# Supplementary material
Source: Royal Society of Chemistry journal article supplement (doi:10.1039/d6ob00648e)
Supplement: d6ob00648e1.pdf [file d6ob00648e1.pdf]

## Supporting Information

### One-pot synthesis of *N*-arylated benzotriazoles and benzotriazinones via *in situ* diazotization and aryne trapping

Balaji M. Ghodake<sup>ab</sup> and Asish K. Bhattacharya<sup>\*ab</sup>

<sup>a</sup>Division of Organic Chemistry, CSIR-National Chemical Laboratory (CSIR-NCL), Dr. Homi Bhabha Road, Pune-411 008, India. E-mail: [ak.bhattacharya.ncl@csir.res.in](mailto:ak.bhattacharya.ncl@csir.res.in)

<sup>b</sup>Academy of Scientific and Innovative Research (AcSIR), CSIR-HRDC Campus, Sector 19, Kamla Nehru Nagar, Ghaziabad, UP, 201 002, India.

#### Content

1. Copies of NMR Spectra and HRMS of all the Synthesized Compounds

# 1. Copies of $^1\text{H}$ , $^{13}\text{C}$ , $^{19}\text{F}$ NMR Spectra and HRMS of all the Synthesized Compounds:

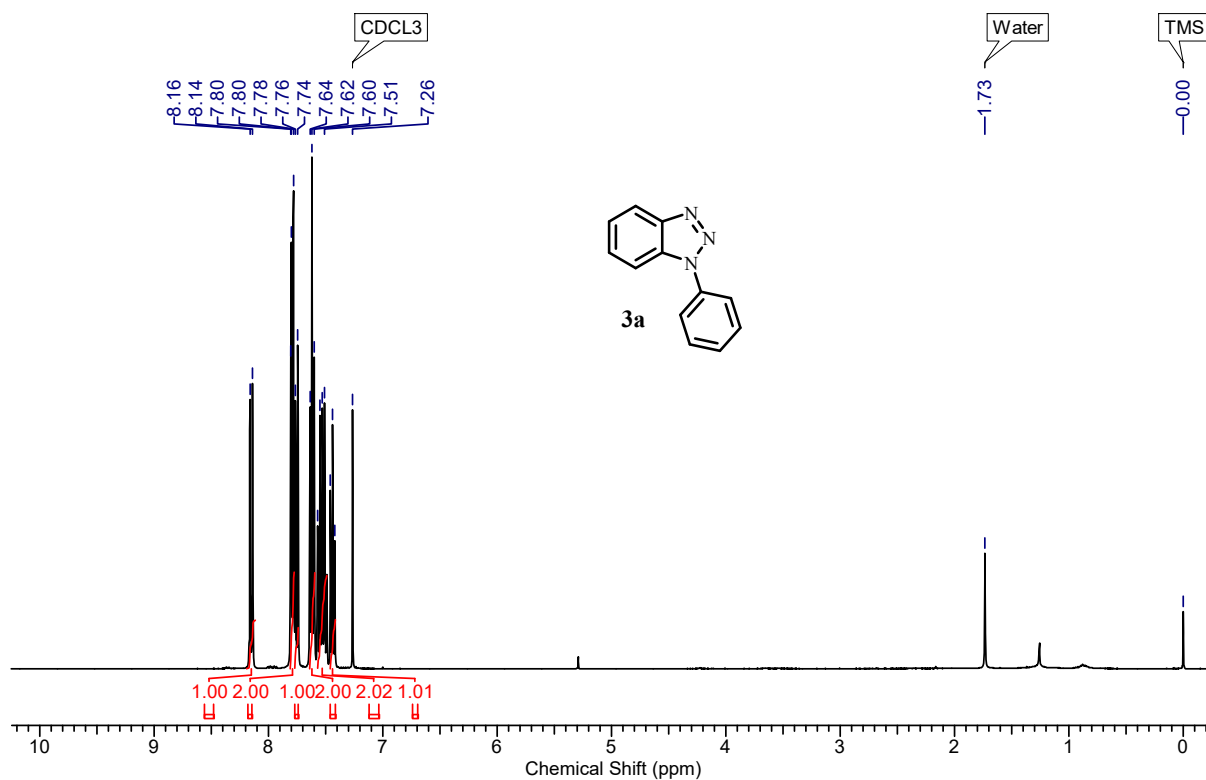

$^1\text{H}$  NMR ( $\text{CDCl}_3$ , 400 MHz) of Compound 3a

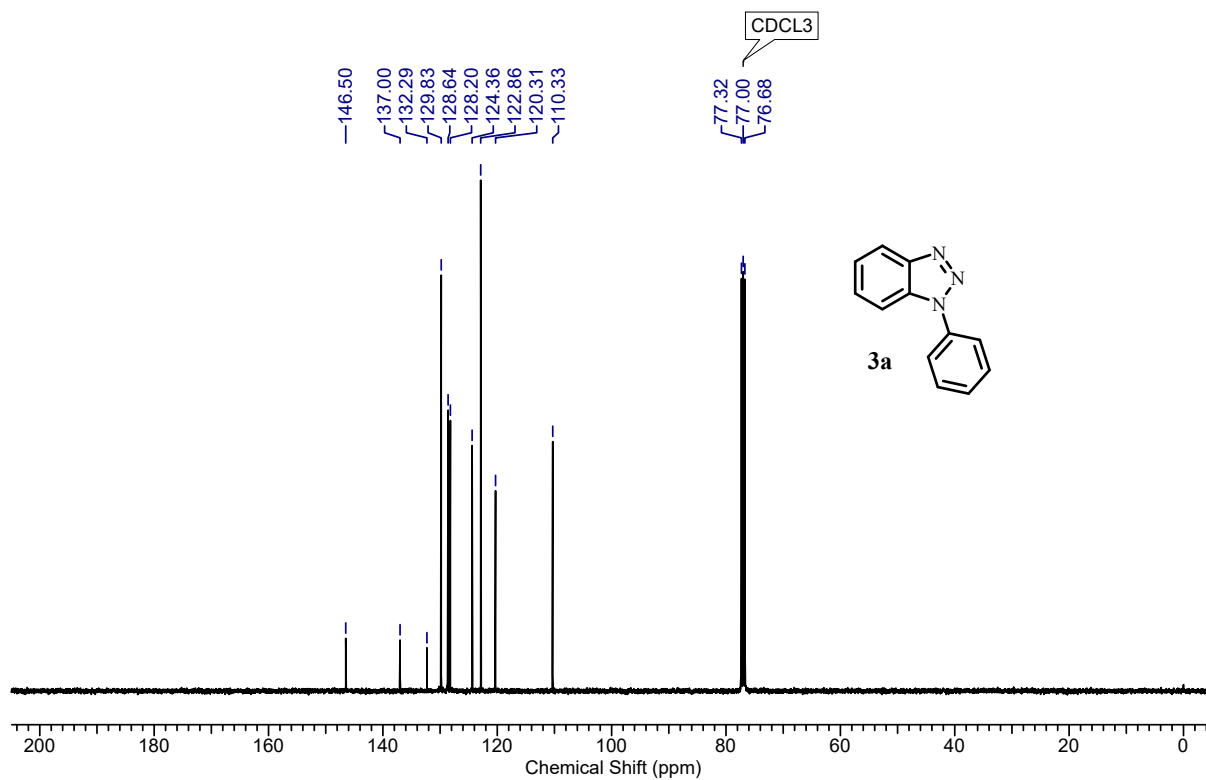

$^{13}\text{C}$  NMR ( $\text{CDCl}_3$ , 100 MHz) of Compound 3a

BTA-1 #375 RT: 2.02 AV: 1 NL: 2.83E9  
T: FTMS + p ESIFull ms [100.0000-1500.0000]

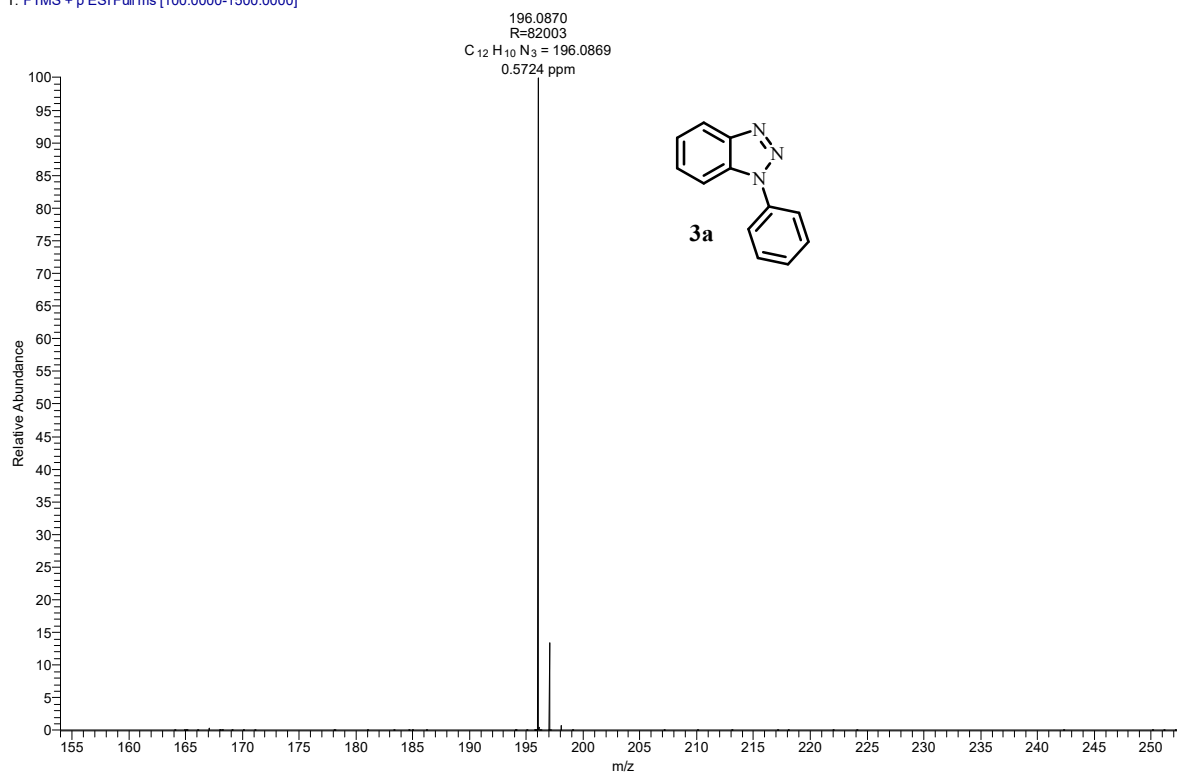

### HRMS of Compound 3a

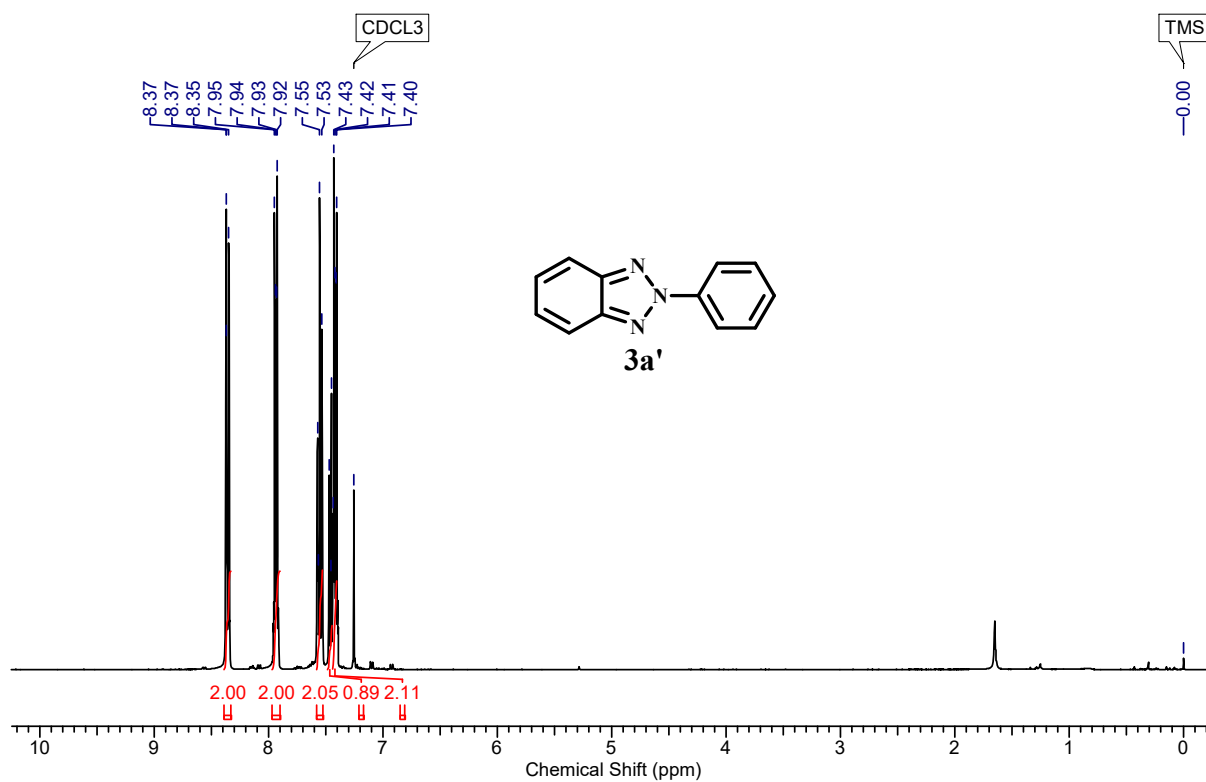

### <sup>1</sup>H NMR (CDCl<sub>3</sub>, 400 MHz) of Compound 3a'

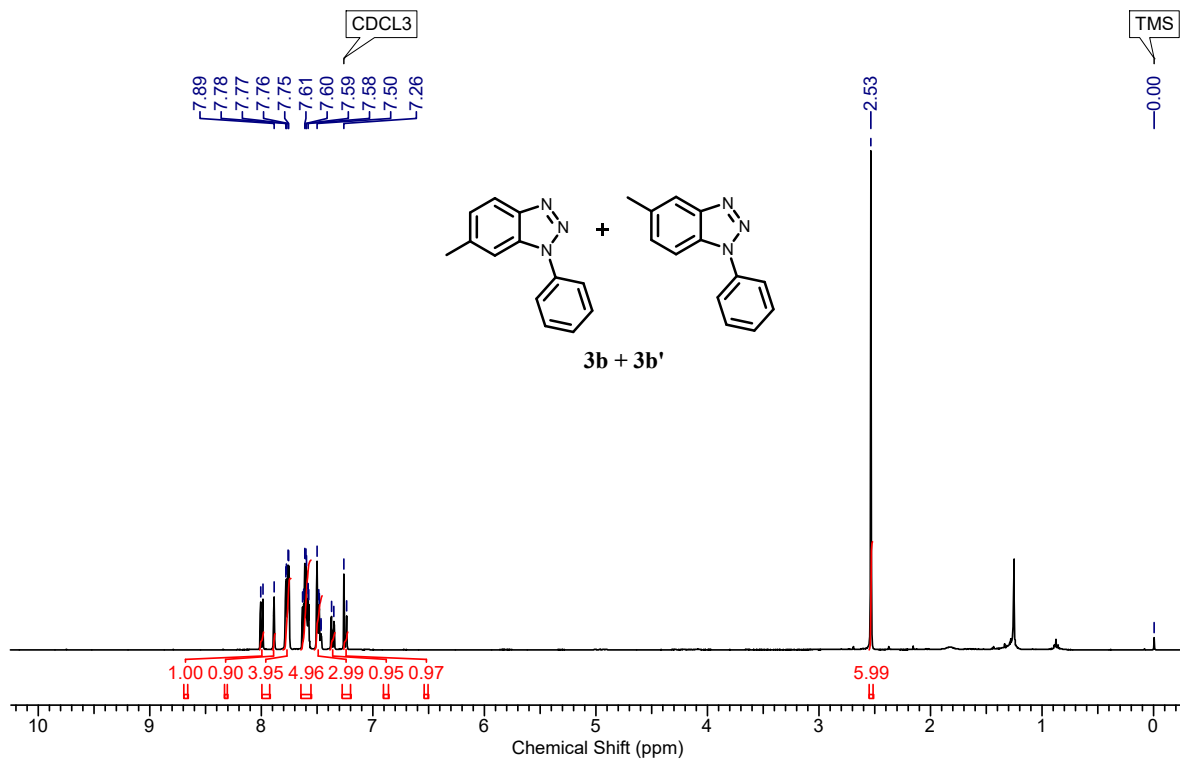

<sup>1</sup>H NMR (CDCl<sub>3</sub>, 400 MHz) of Compound **3b** + **3b'**

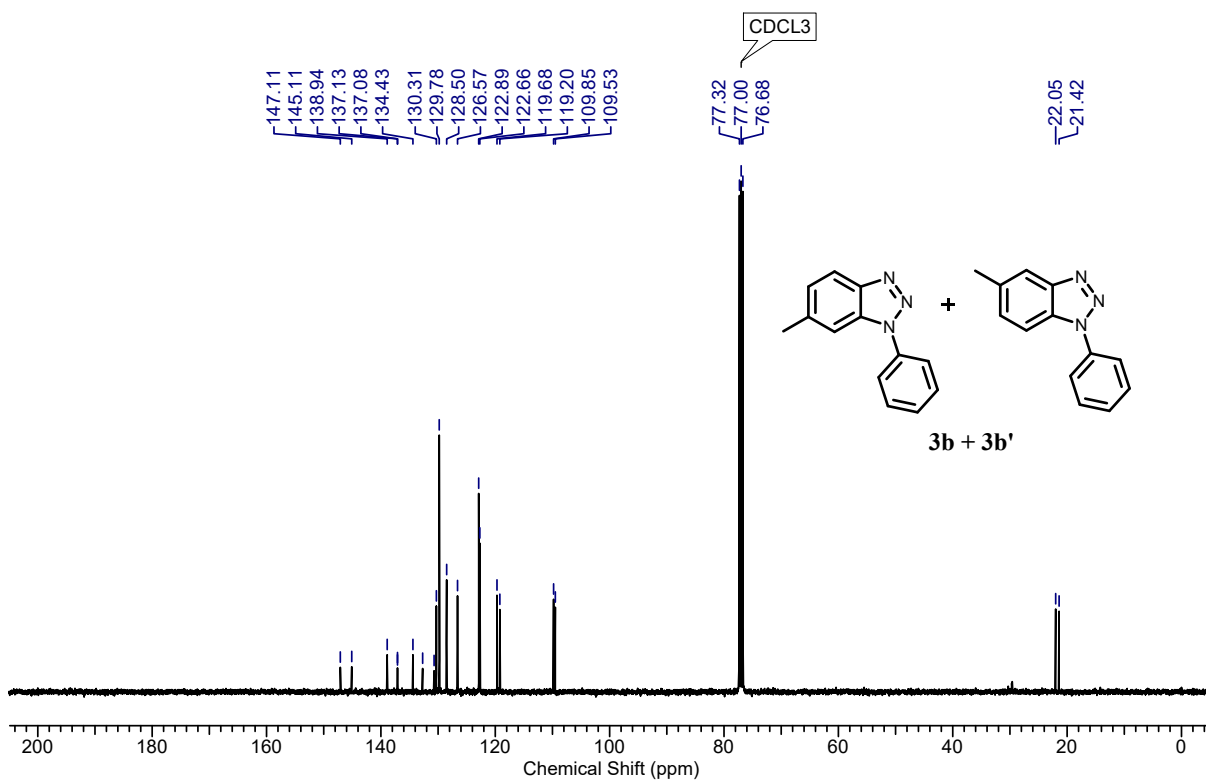

<sup>13</sup>C NMR (CDCl<sub>3</sub>, 100 MHz) of Compound **3b** + **3b'**

BTA-2#483 RT: 2.58 AV: 1 NL: 3.54E8  
T: FTMS + p ESIFull ms [100.0000-1500.0000]

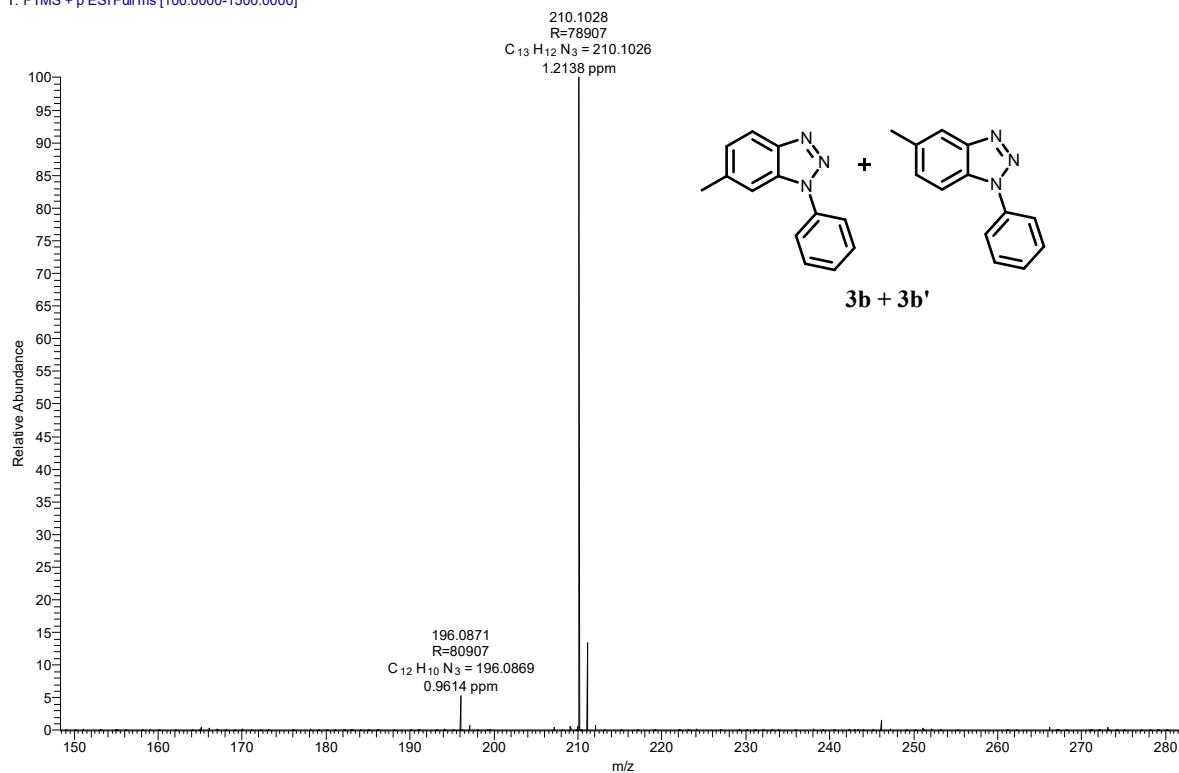

### HRMS of Compound 3b + 3b'

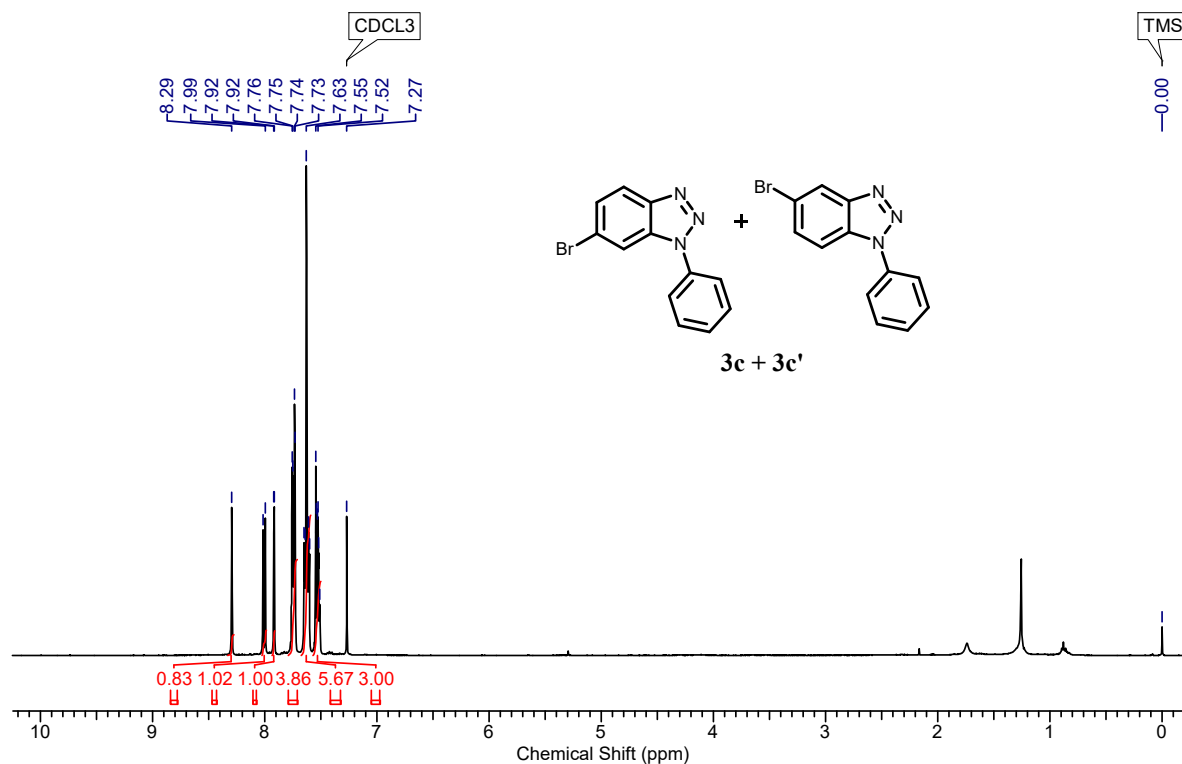

### <sup>1</sup>H NMR (CDCl<sub>3</sub>, 400 MHz) of Compound 3c + 3c'

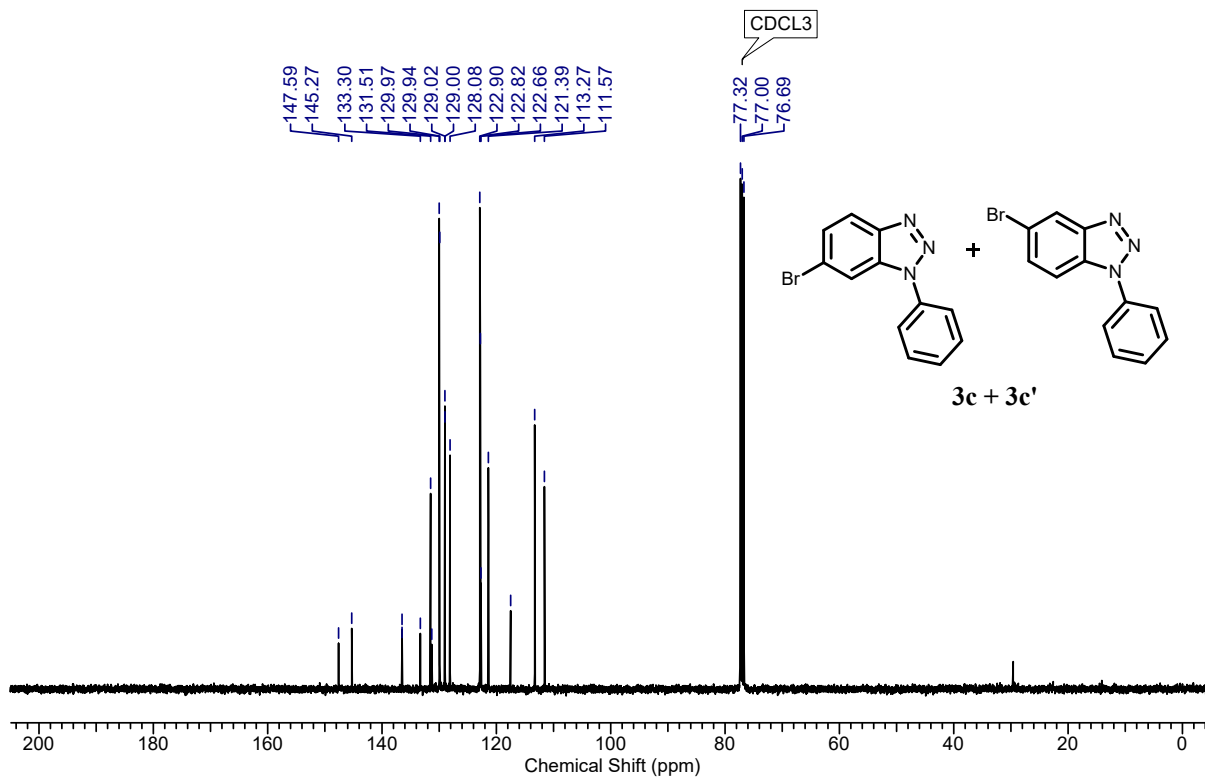

<sup>13</sup>C NMR (CDCl<sub>3</sub>, 100 MHz) of Compound 3c + 3c'

BTA-3 #873 RT: 4.70 AV: 1 NL: 5.13E6  
T: FTMS + p ESI Full ms [100.0000-1500.0000]

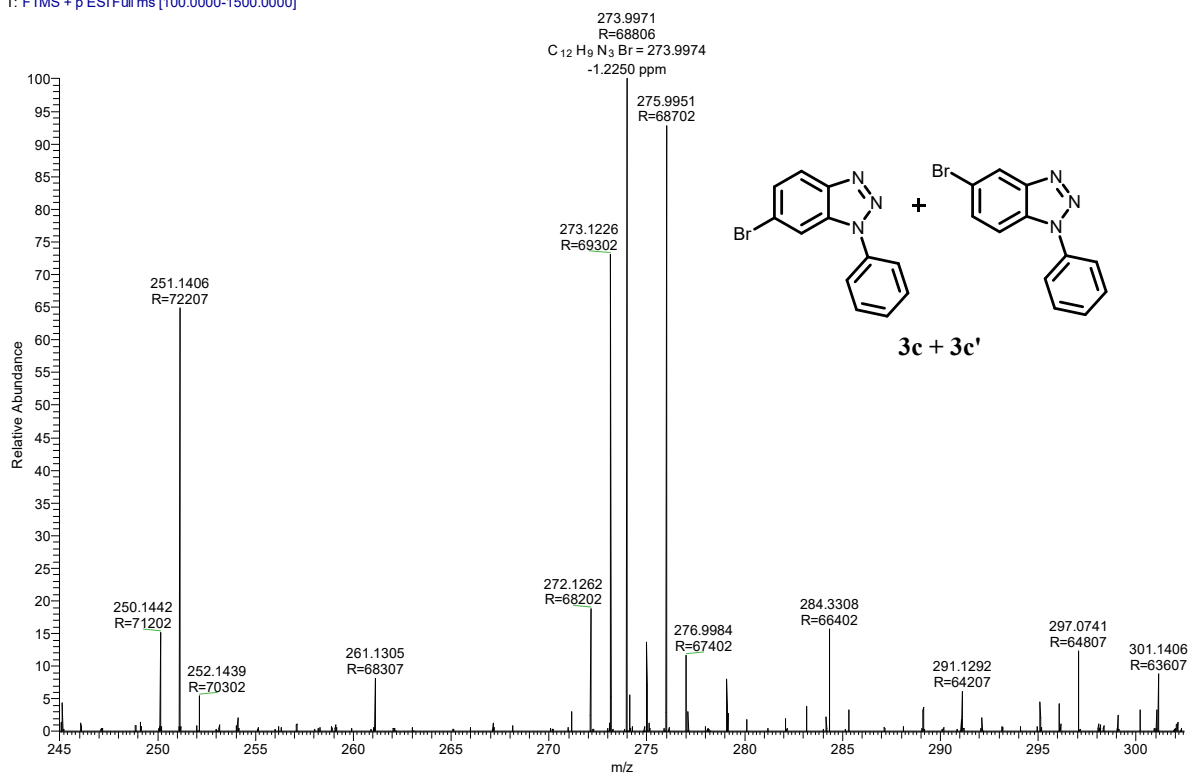

HRMS of Compound 3c + 3c'

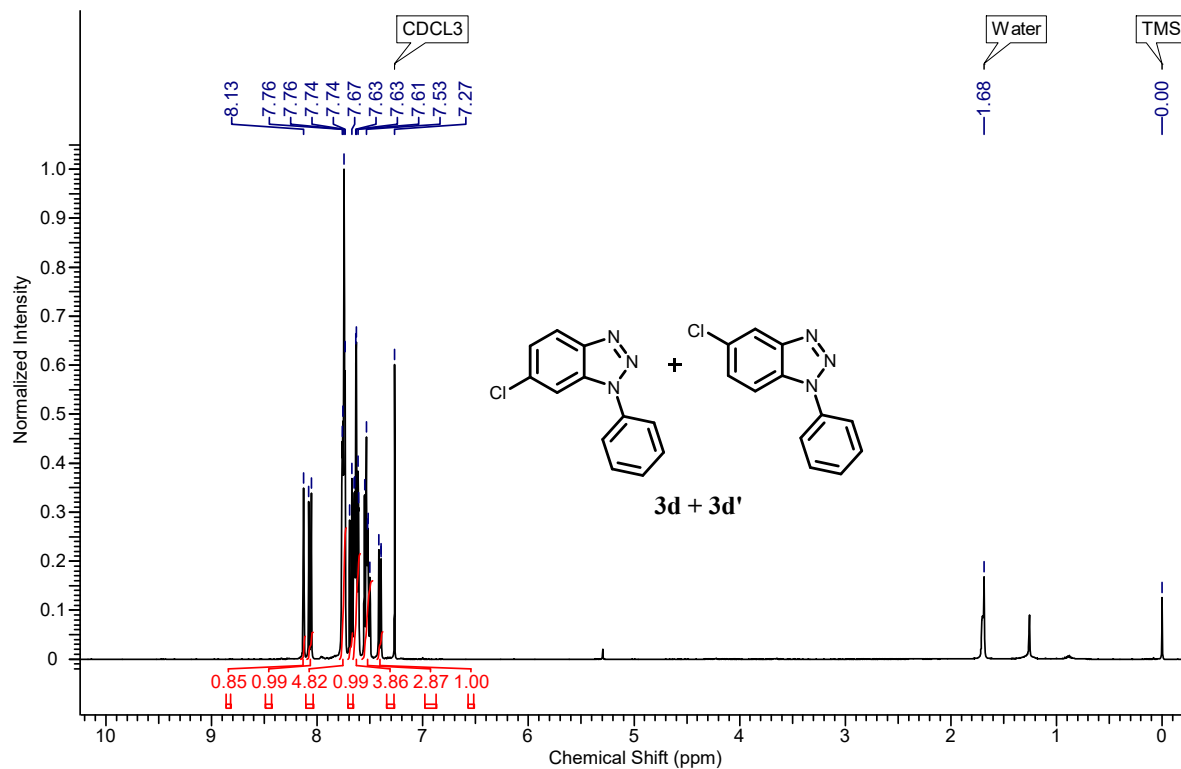

**<sup>1</sup>H NMR (CDCl<sub>3</sub>, 400 MHz) of Compound 3d + 3d'**

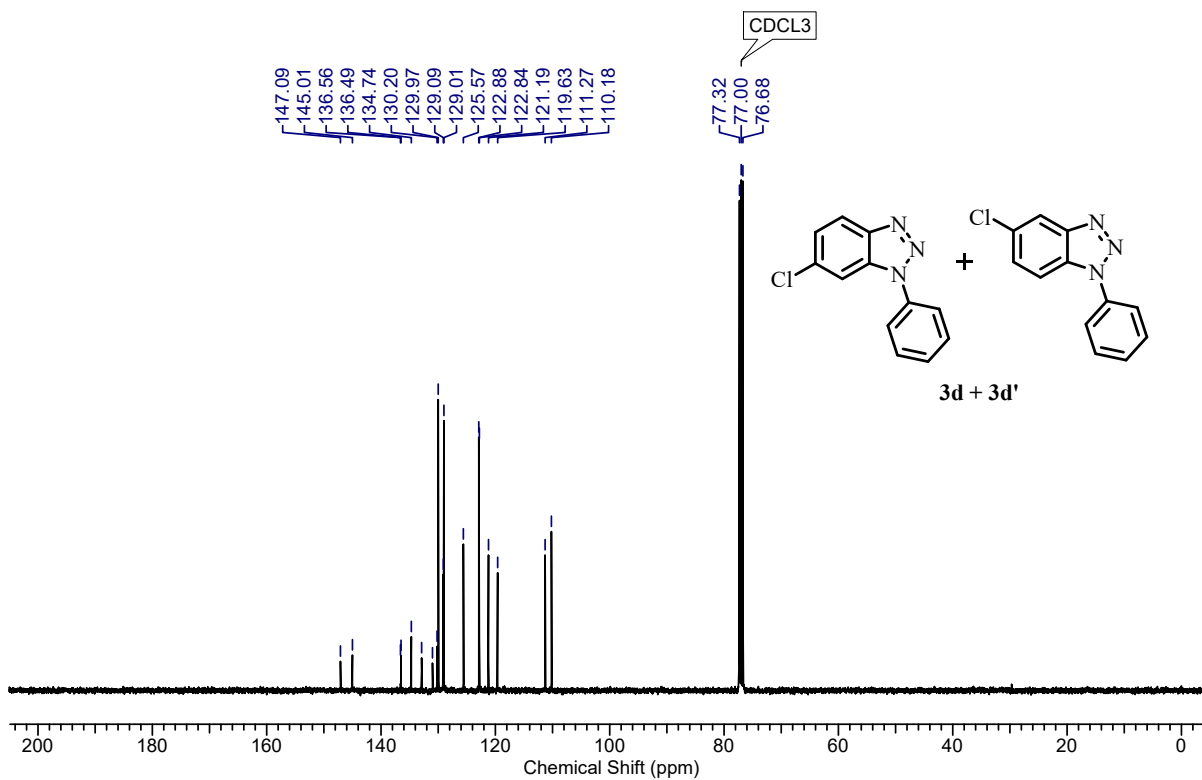

**<sup>13</sup>C NMR (CDCl<sub>3</sub>, 100 MHz) of Compound 3d + 3d'**

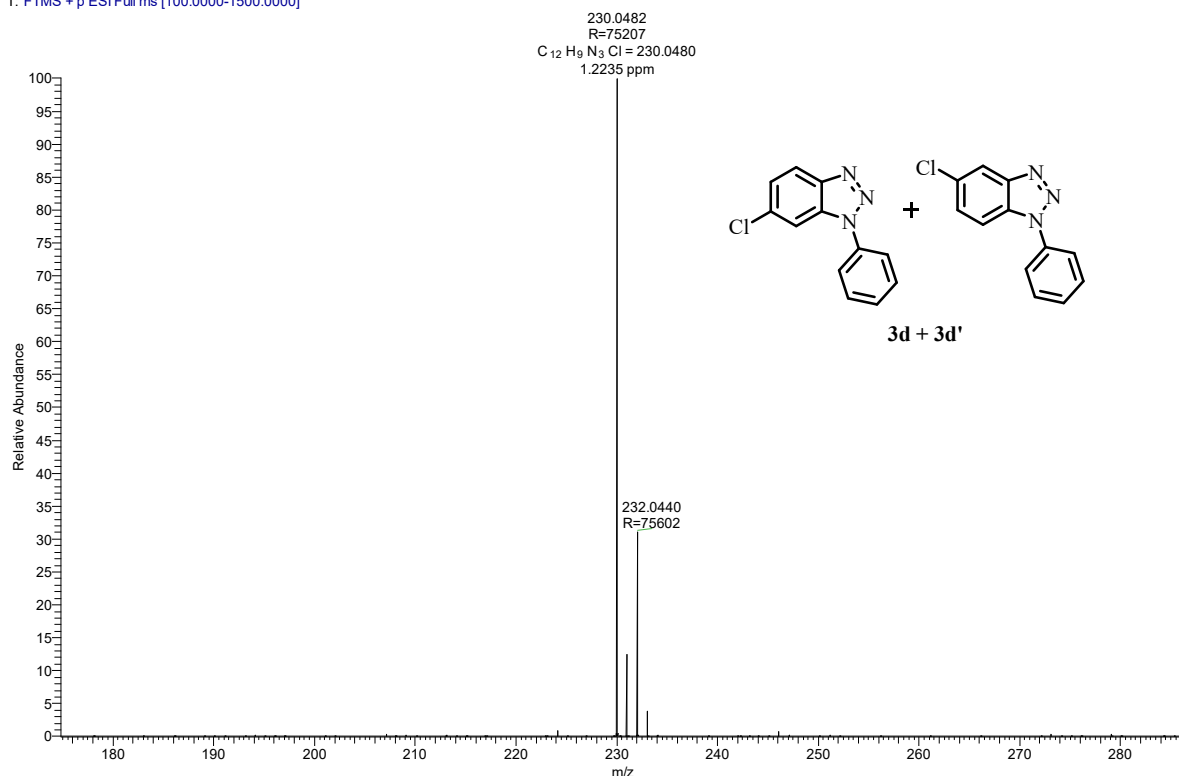

HRMS of Compound 3d + 3d'

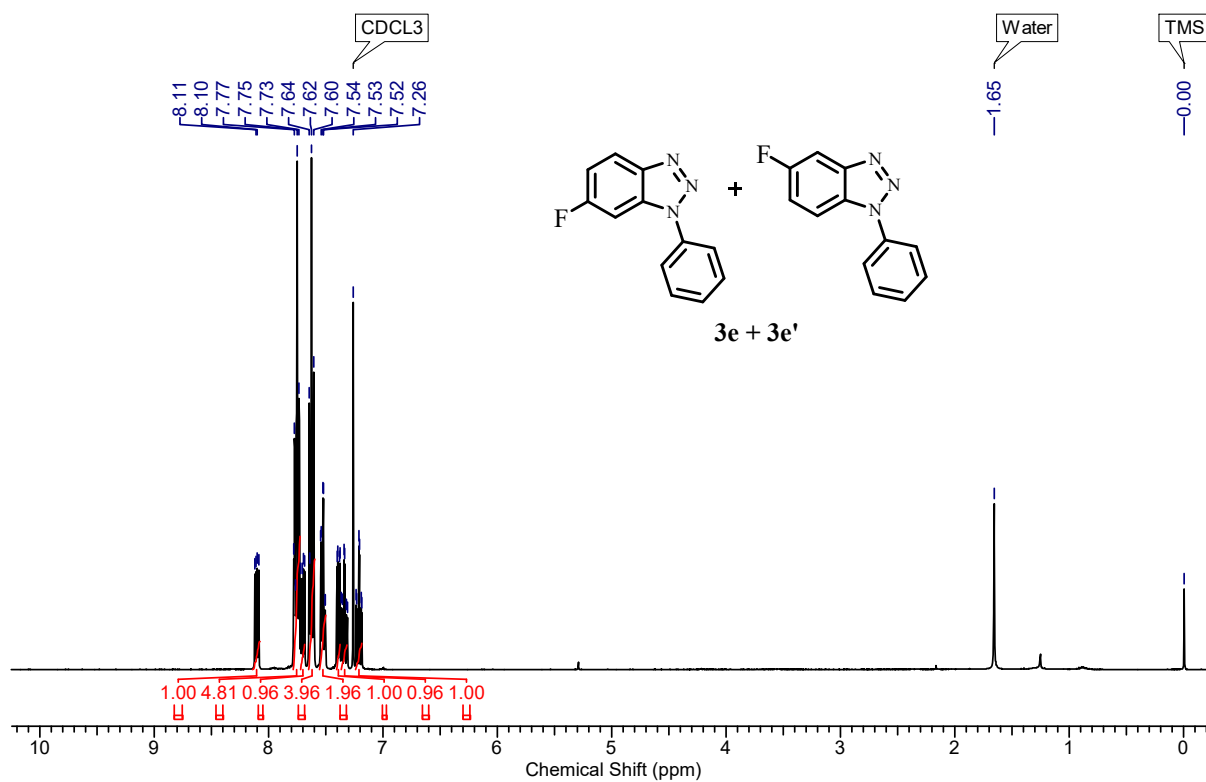

<sup>1</sup>H NMR (CDCl<sub>3</sub>, 400 MHz) of Compound 3e + 3e'

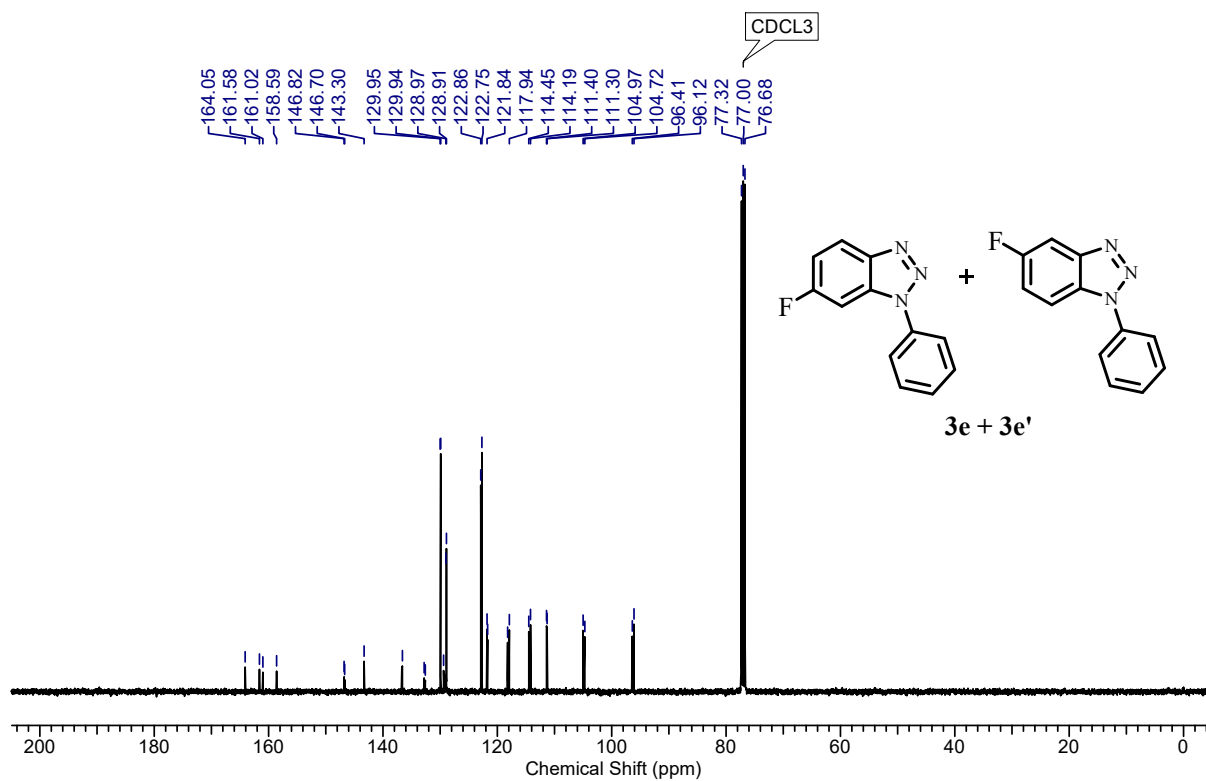

**<sup>13</sup>C NMR (CDCl<sub>3</sub>, 100 MHz) of Compound 3e + 3e'**

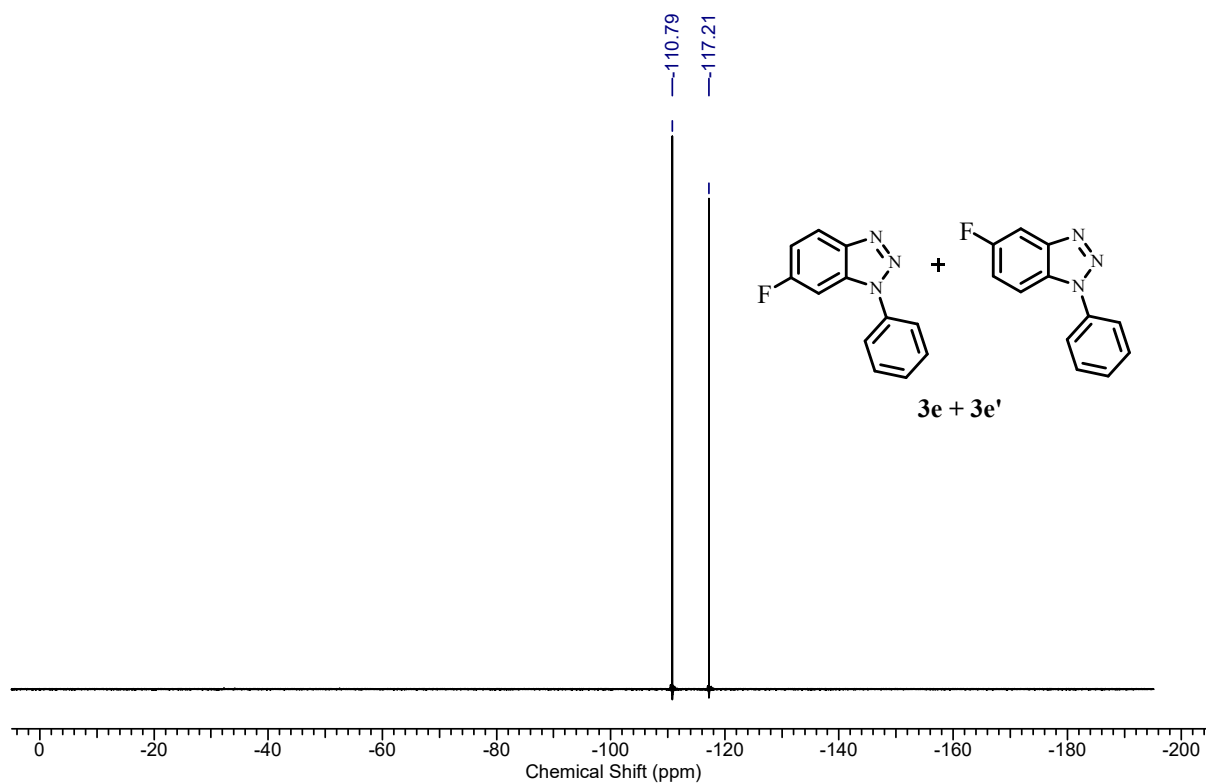

**<sup>19</sup>F NMR (CDCl<sub>3</sub>, 376 MHz) of Compound 3e + 3e'**

BTA-5 #335 RT: 1.81 AV: 1 NL: 1.72E9  
T: FTMS + p ESIFull ms [100.0000-1500.0000]

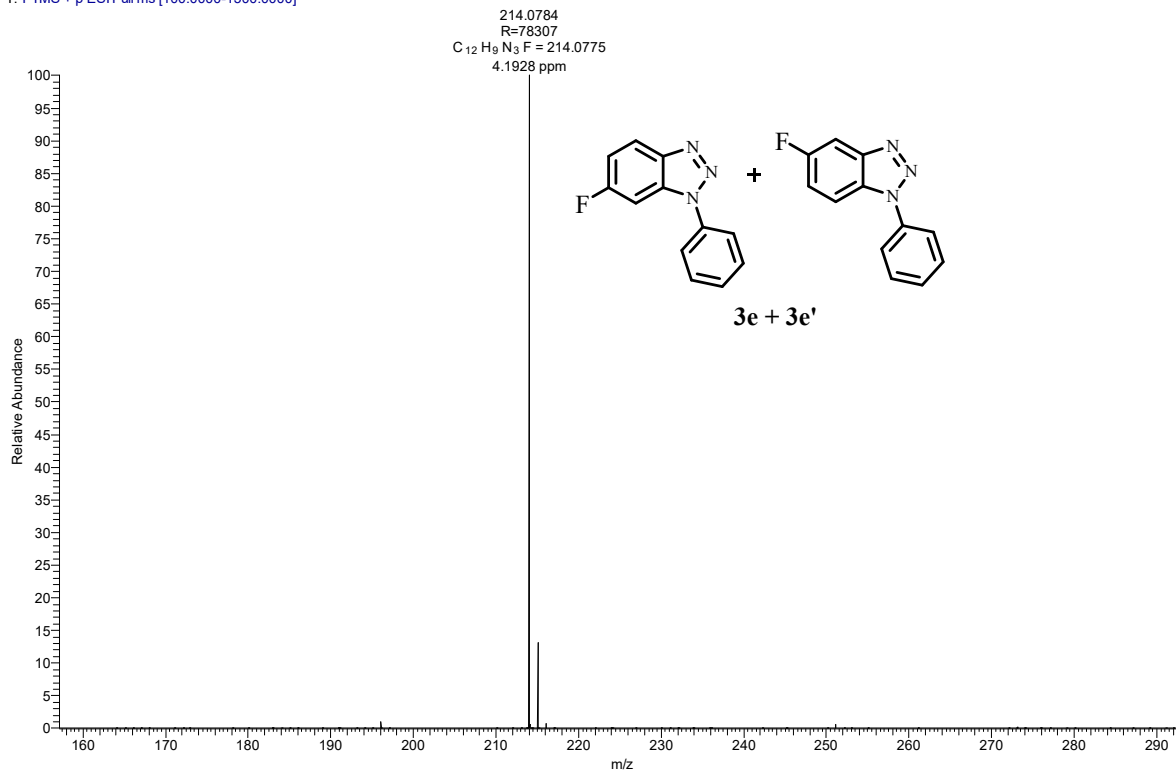

### HRMS of Compound 3e + 3e'

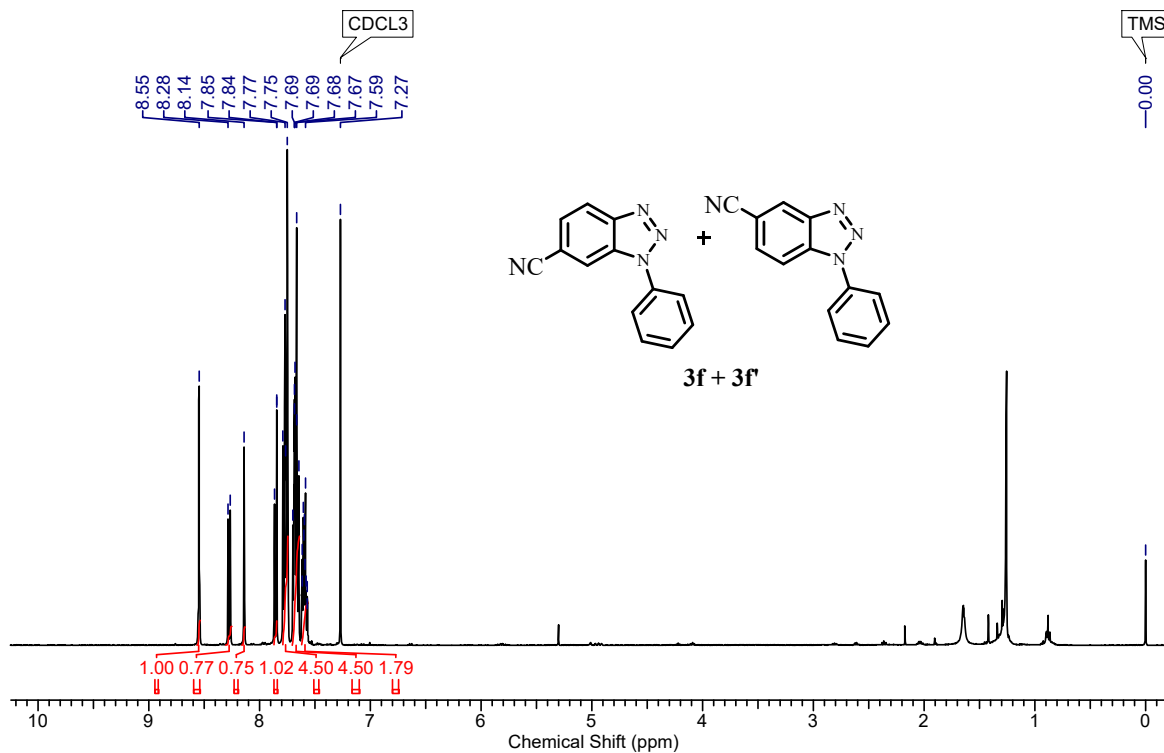

### <sup>1</sup>H NMR (CDCl<sub>3</sub>, 400 MHz) of Compound 3f + 3f'

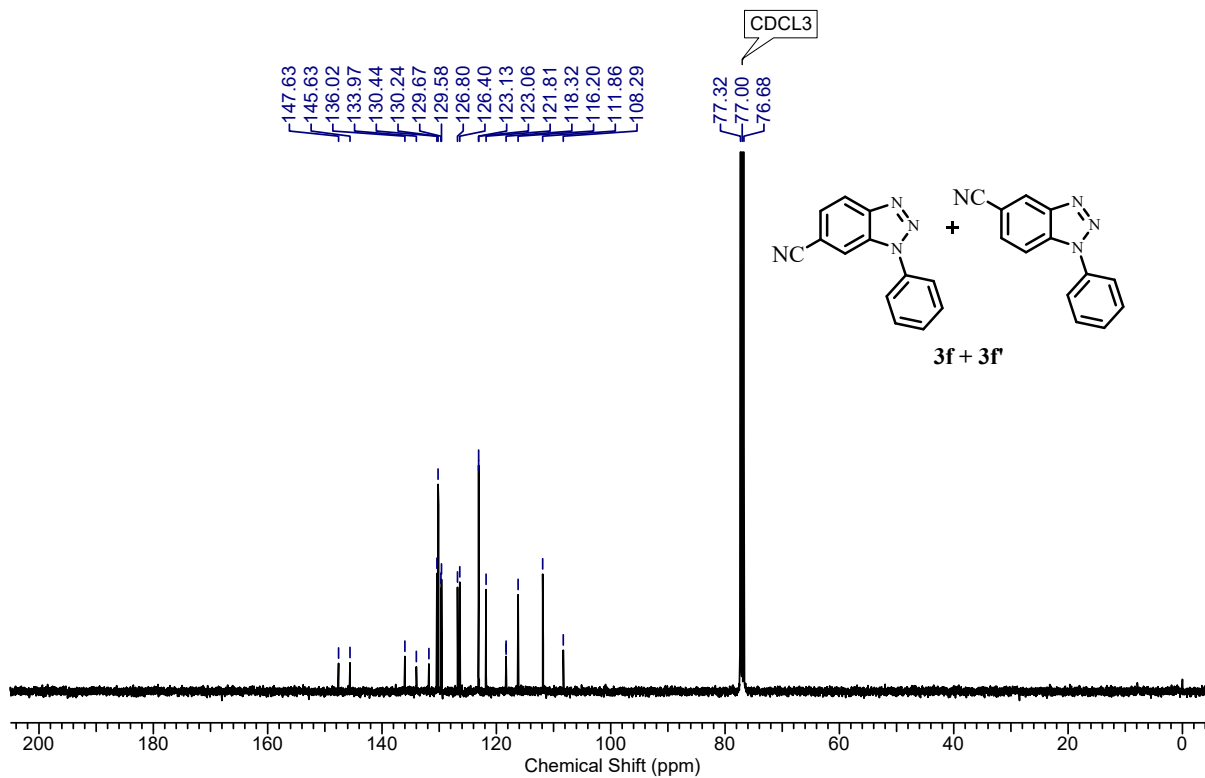

**<sup>13</sup>C NMR (CDCl<sub>3</sub>, 100 MHz) of Compound 3f + 3f'**

BTA-6 #326 RT: 1.76 AV: 1 NL: 7.96E7  
 T: FTMS + p ESI Full ms [100.0000-1500.0000]

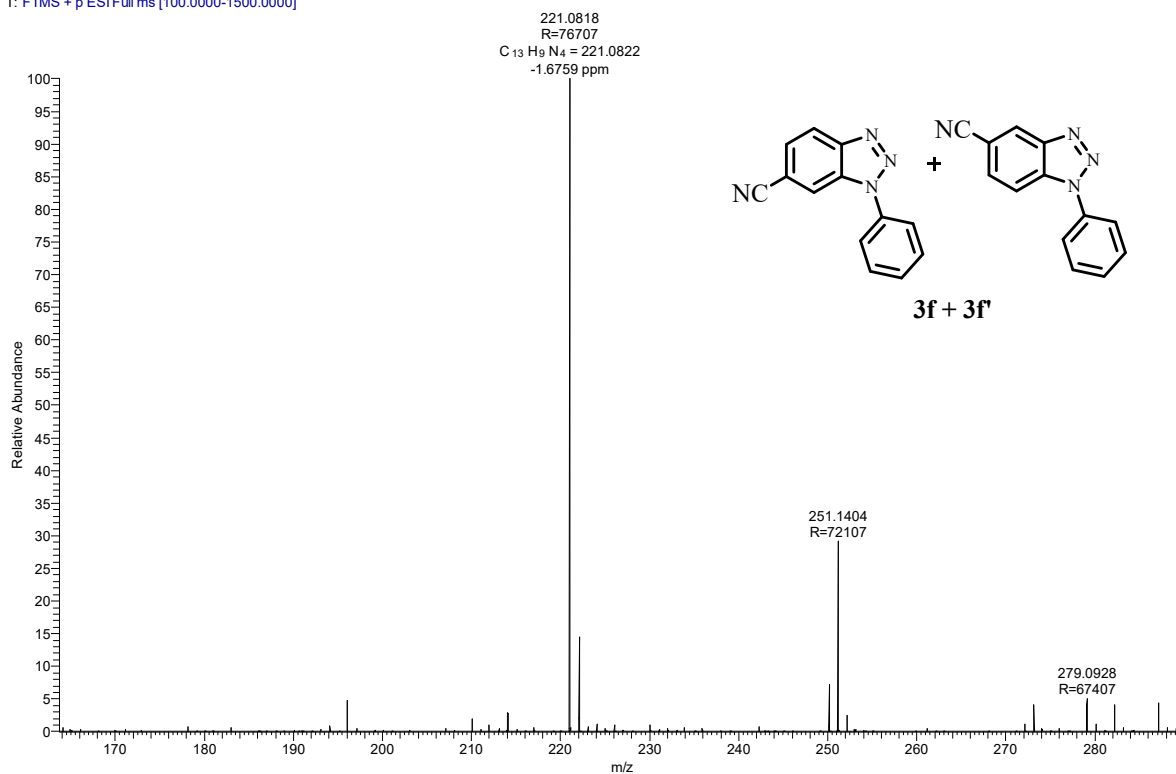

**HRMS of Compound 3f + 3f'**

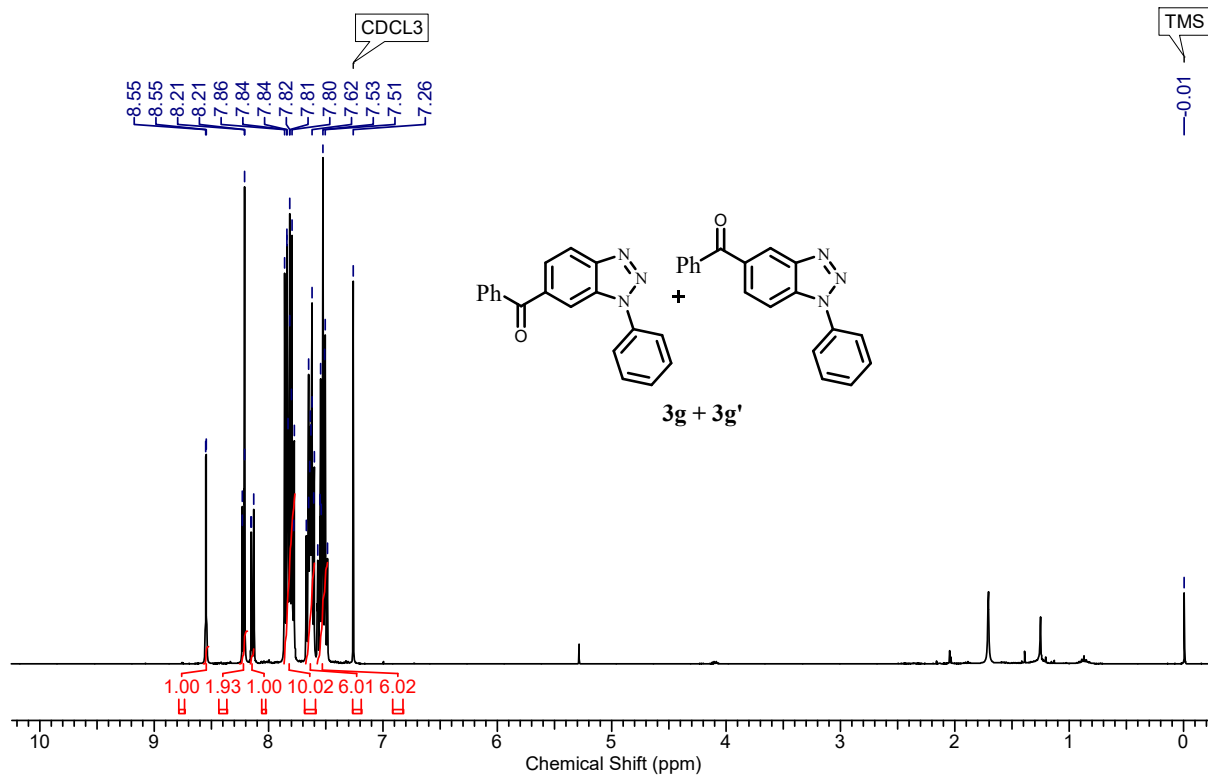

**<sup>1</sup>H NMR (CDCl<sub>3</sub>, 400 MHz) of Compound 3g + 3g'**

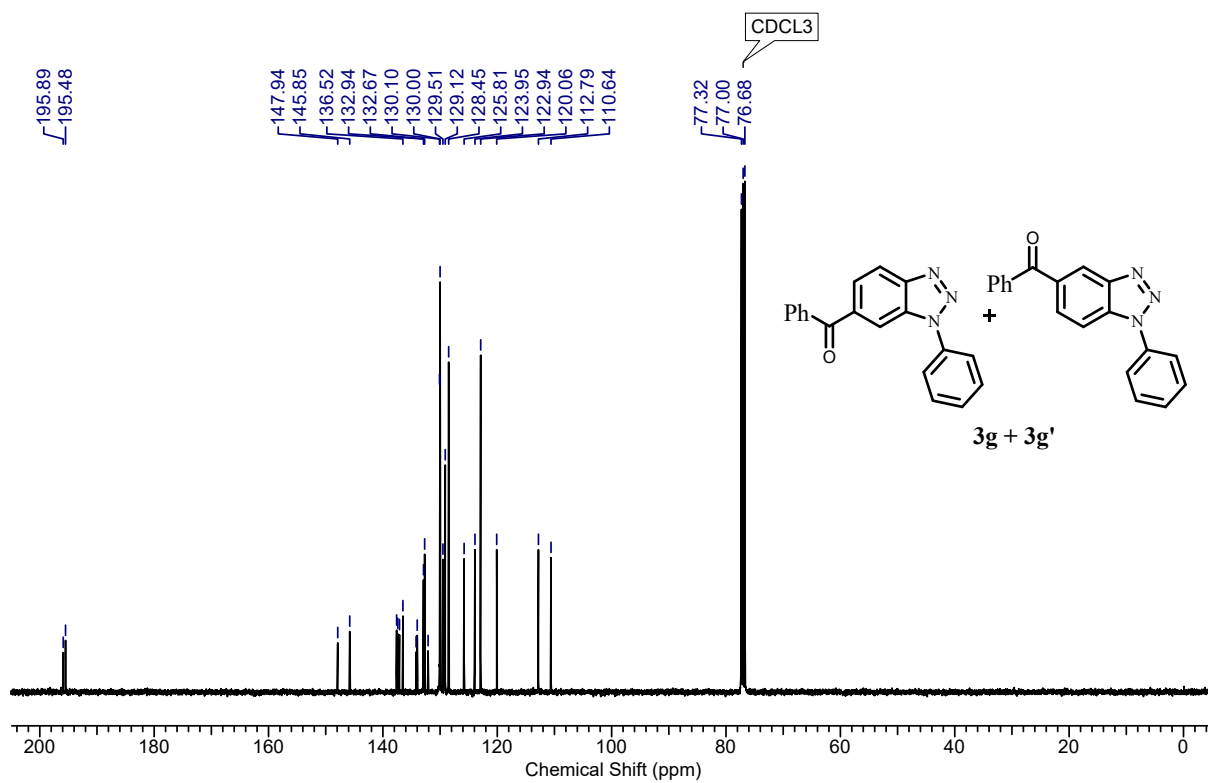

**<sup>13</sup>C NMR (CDCl<sub>3</sub>, 100 MHz) of Compound 3g + 3g'**

BTA-7 #380 RT: 2.04 AV: 1 NL: 1.04E9  
T: FTMS + p ESIFull.ms [100.0000-1500.0000]

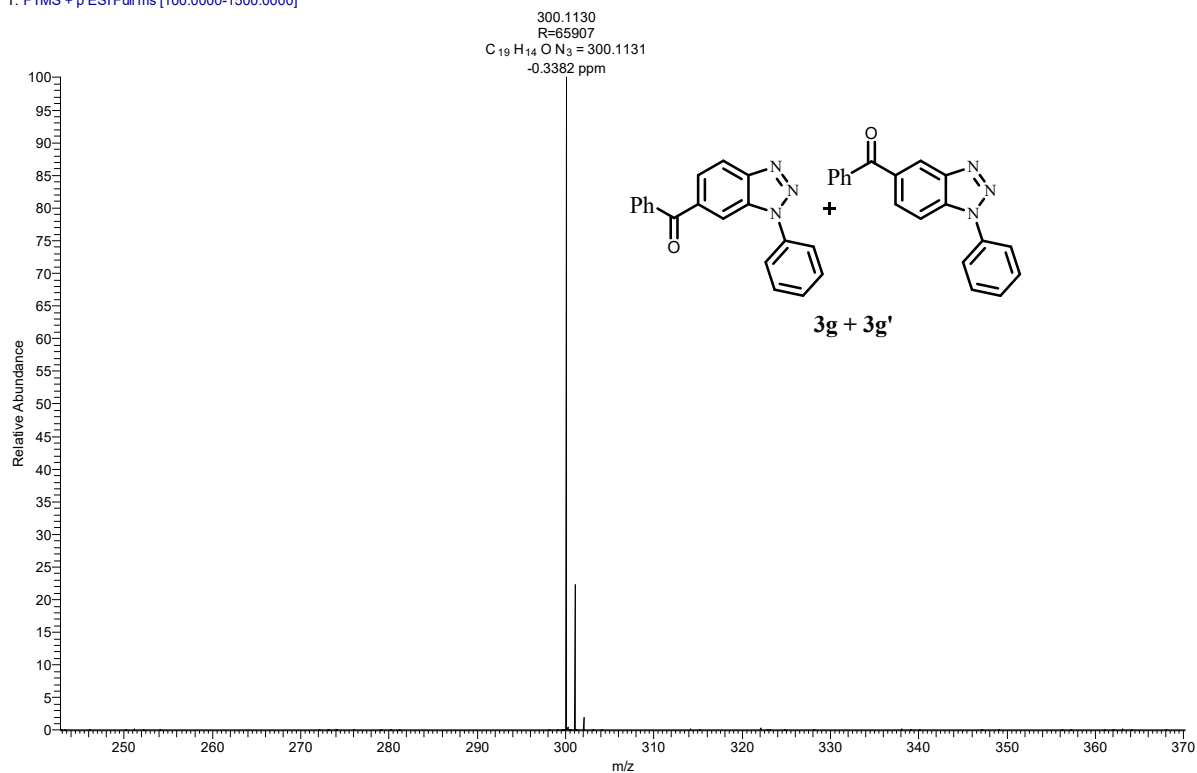

### HRMS of Compound 3g + 3g'

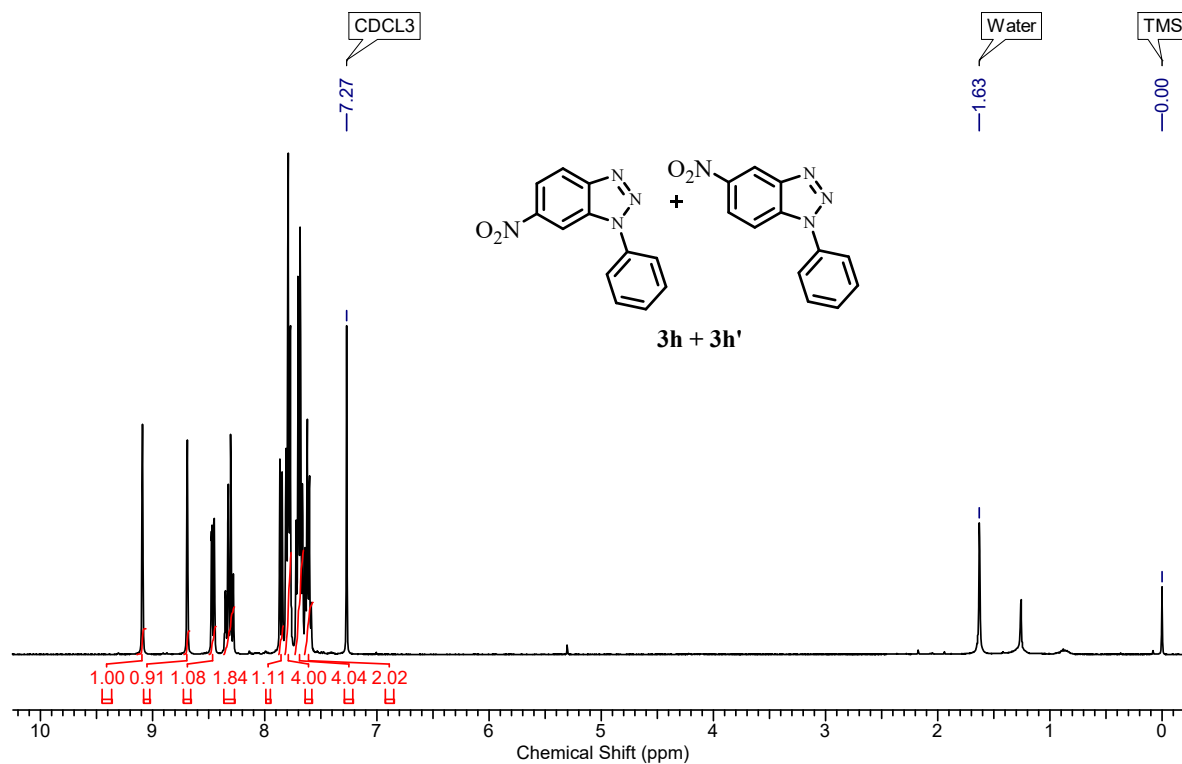

### <sup>1</sup>H NMR (CDCl<sub>3</sub>, 400 MHz) of Compound 3h + 3h'

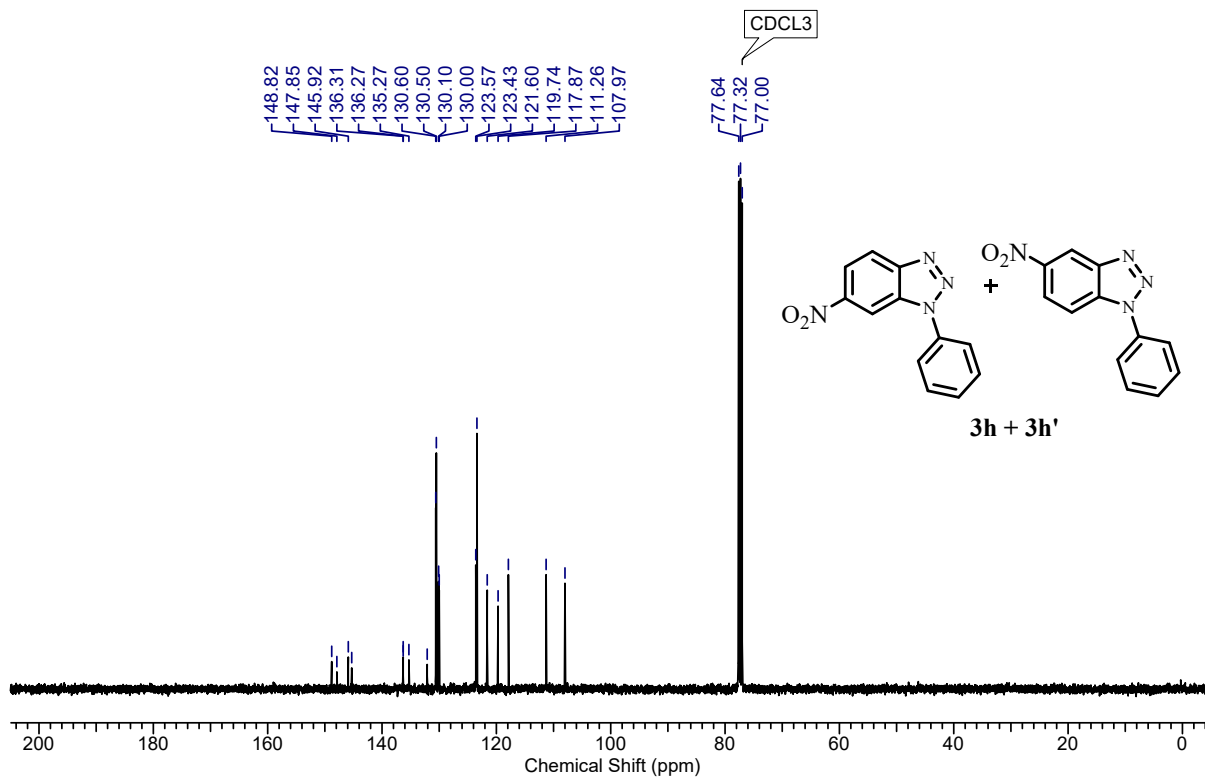

<sup>13</sup>C NMR (CDCl<sub>3</sub>, 100 MHz) of Compound 3h + 3h'

BTA-8 #337 RT: 1.81 AV: 1 NL: 9.63E7  
T: FTMS + p ESI Full ms [100.0000-1500.0000]

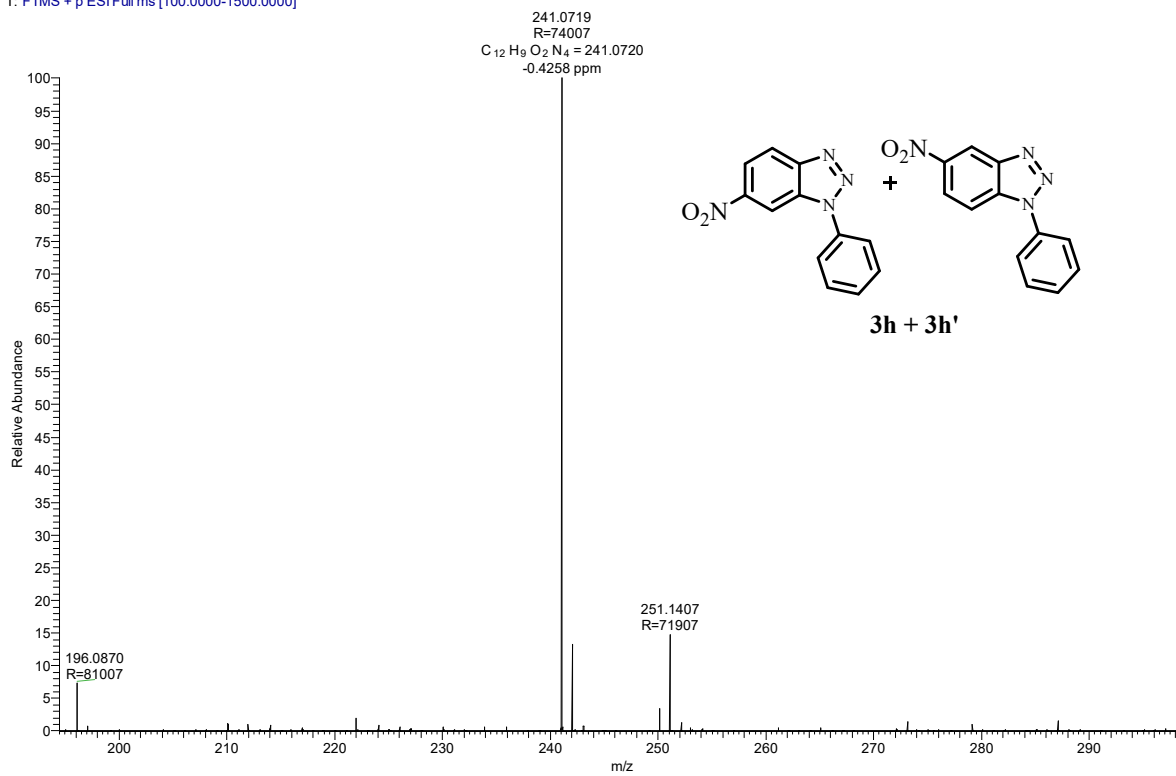

HRMS of Compound 3h + 3h'

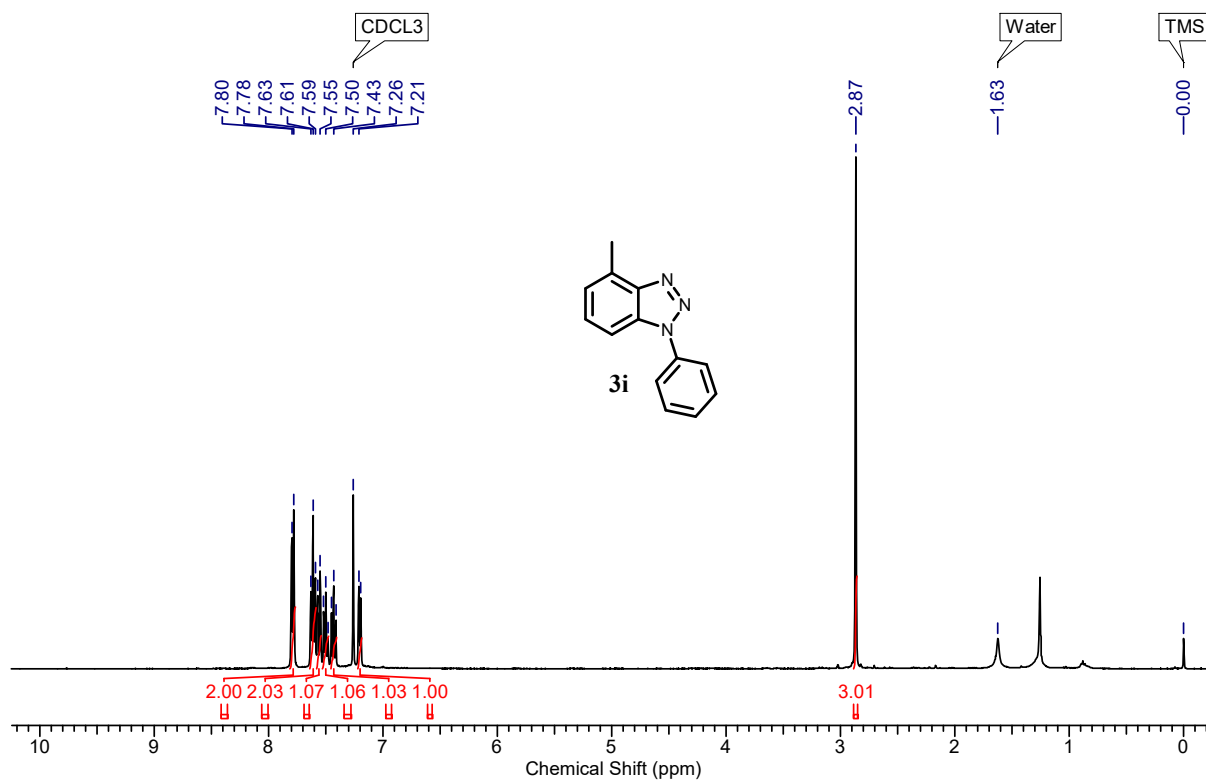

**<sup>1</sup>H NMR (CDCl<sub>3</sub>, 400 MHz) of Compound 3i**

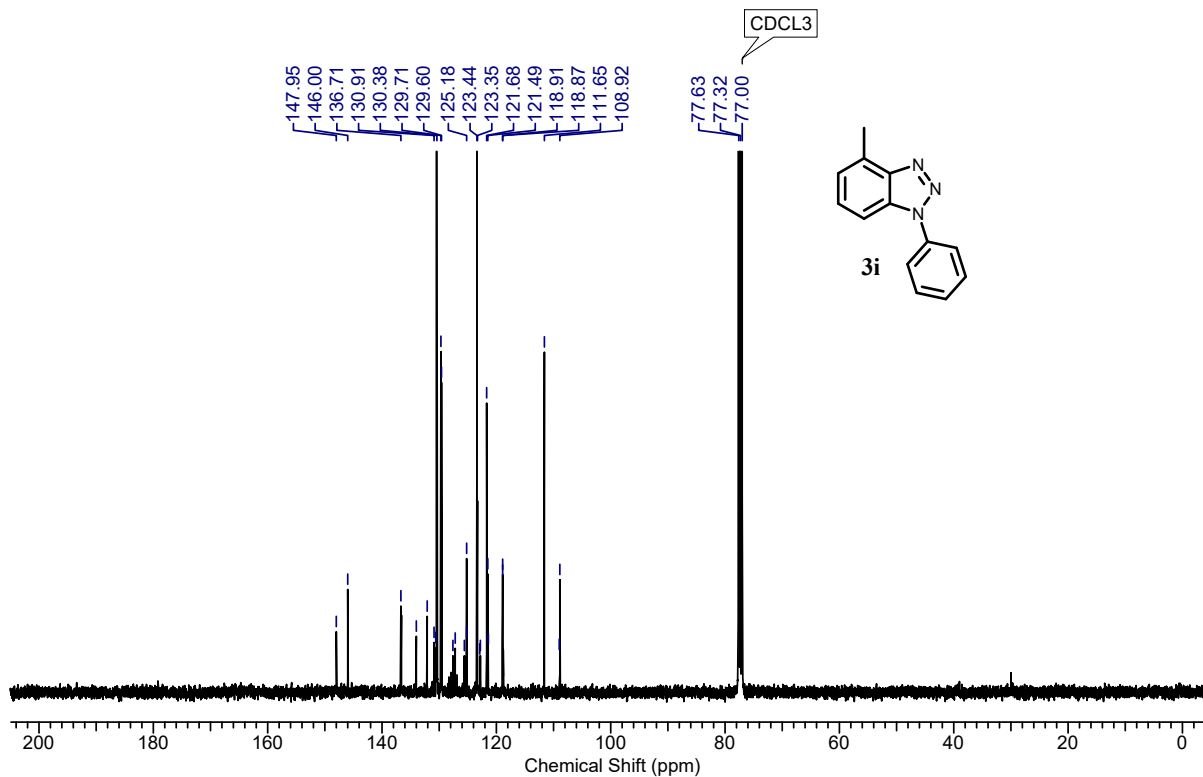

**<sup>13</sup>C NMR (CDCl<sub>3</sub>, 100 MHz) of Compound 3i**

BTA-10 #360 RT: 1.94 AV: 1 NL: 1.75E9  
T: FTMS + p ESI Full ms [100.0000-1500.0000]

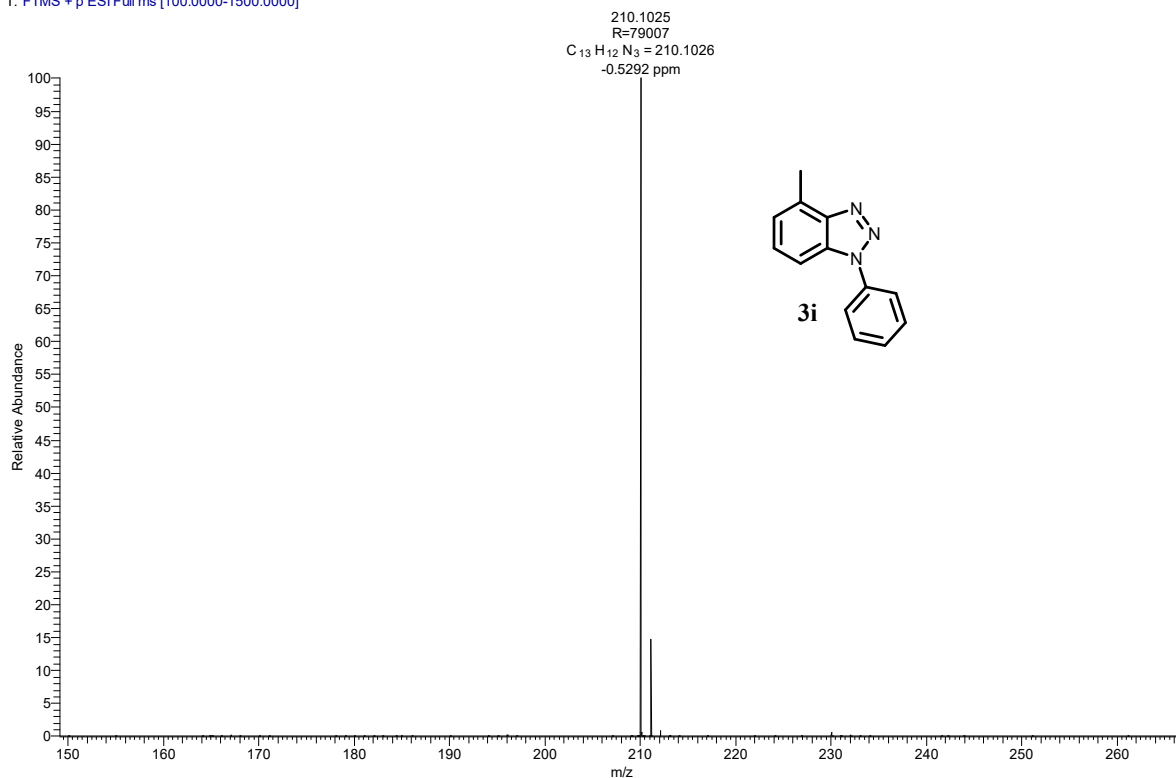

HRMS of Compound 3i

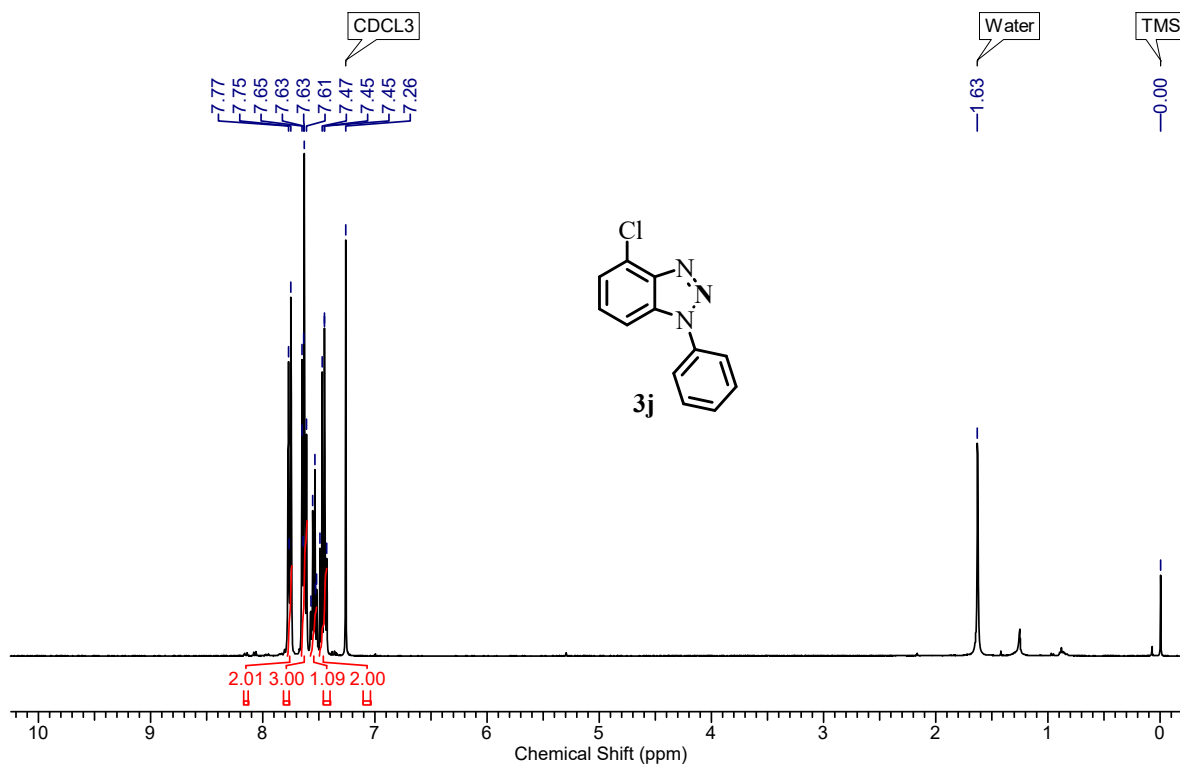

<sup>1</sup>H NMR (CDCl<sub>3</sub>, 400 MHz) of Compound 3j

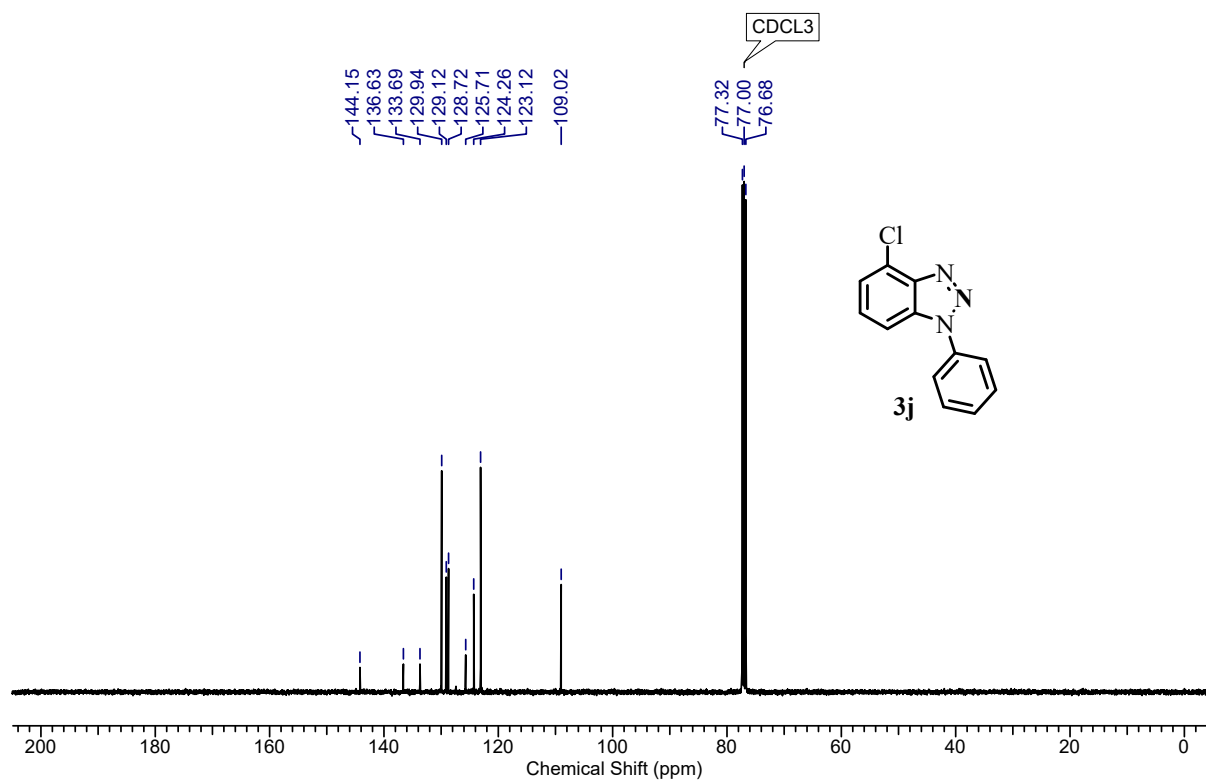

**<sup>13</sup>C NMR (CDCl<sub>3</sub>, 100 MHz) of Compound 3j**

BTA-9#386 RT: 2.07 AV: 1 NL: 1.45E9  
T: FTMS + p ESI Full ms [100.0000-1500.0000]

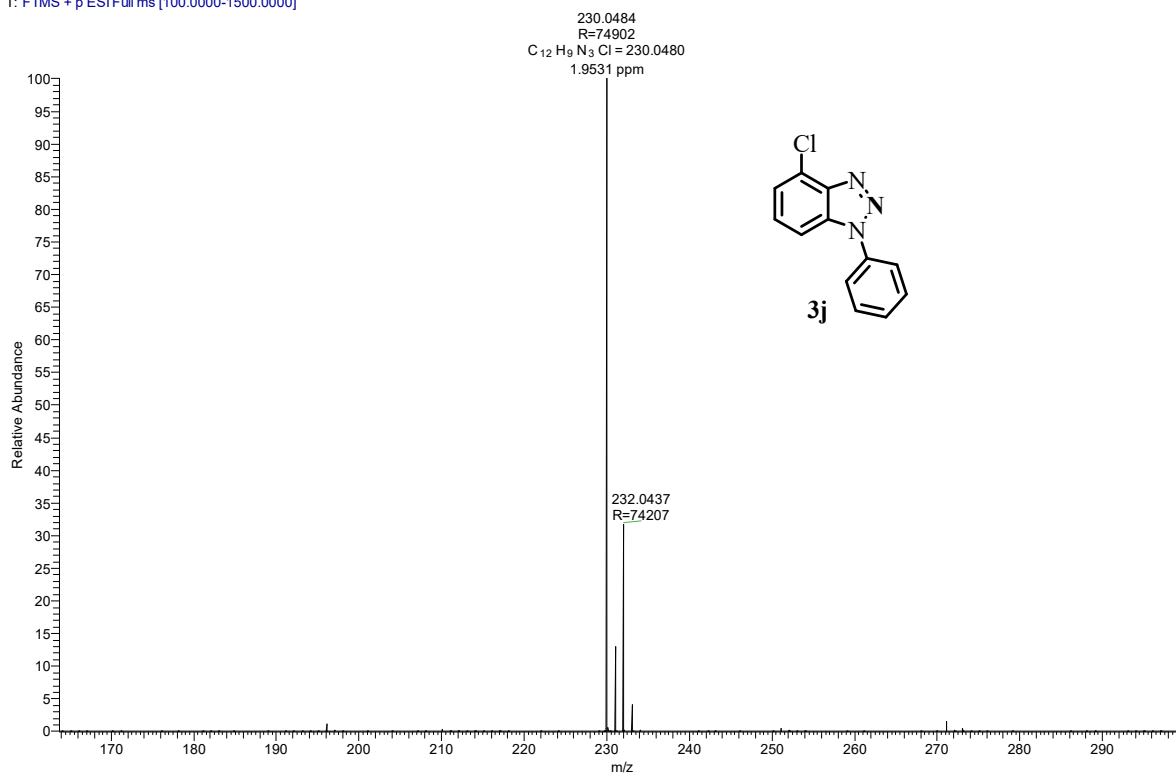

**HRMS of Compound 3j**

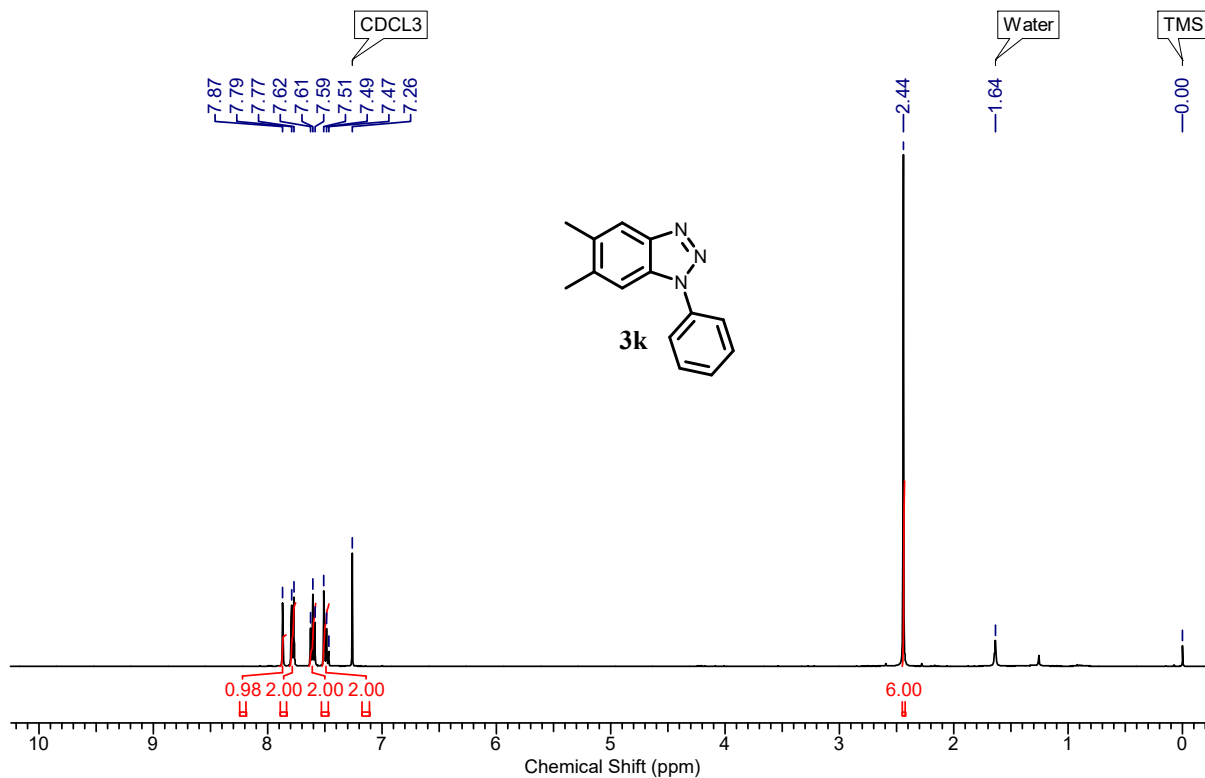

**<sup>1</sup>H NMR (CDCl<sub>3</sub>, 400 MHz) of Compound 3k**

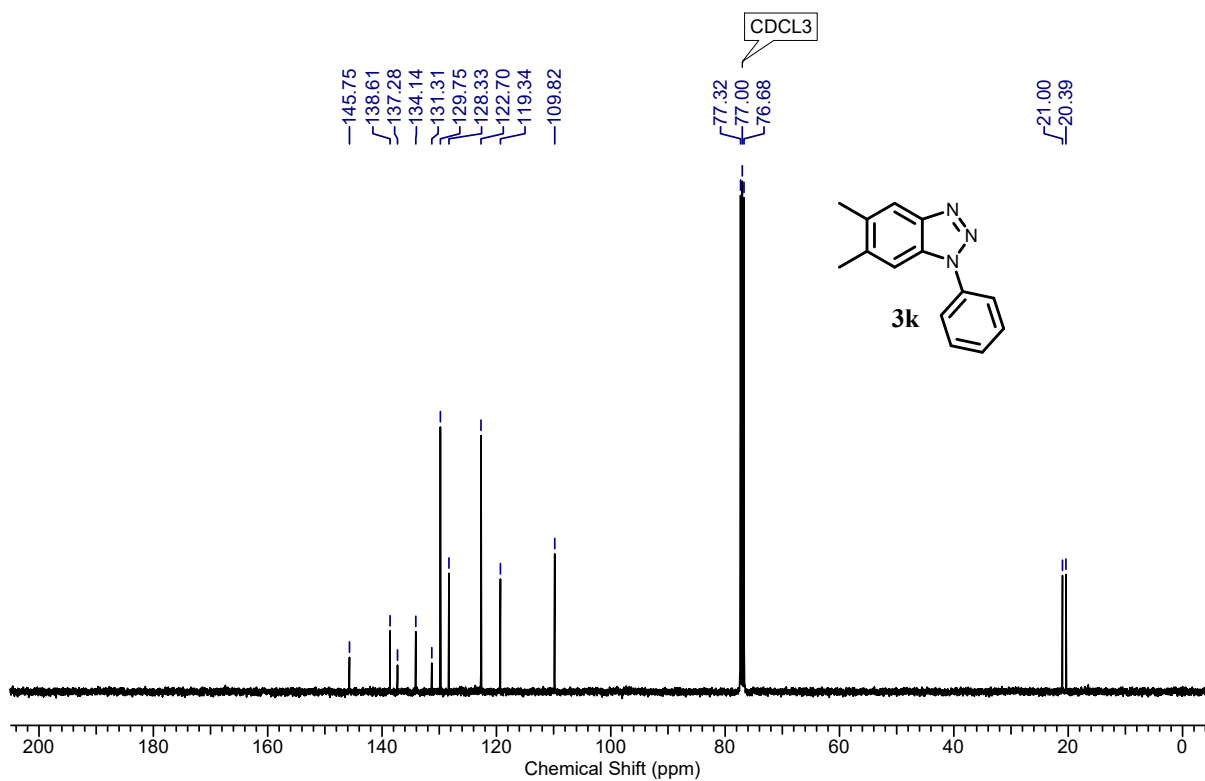

**<sup>13</sup>C NMR (CDCl<sub>3</sub>, 100 MHz) of Compound 3k**

BTA-12 #284 RT: 1.91 AV: 1 NL: 1.85E9  
T: FTMS + p ESI Full ms [100.0000-1500.0000]

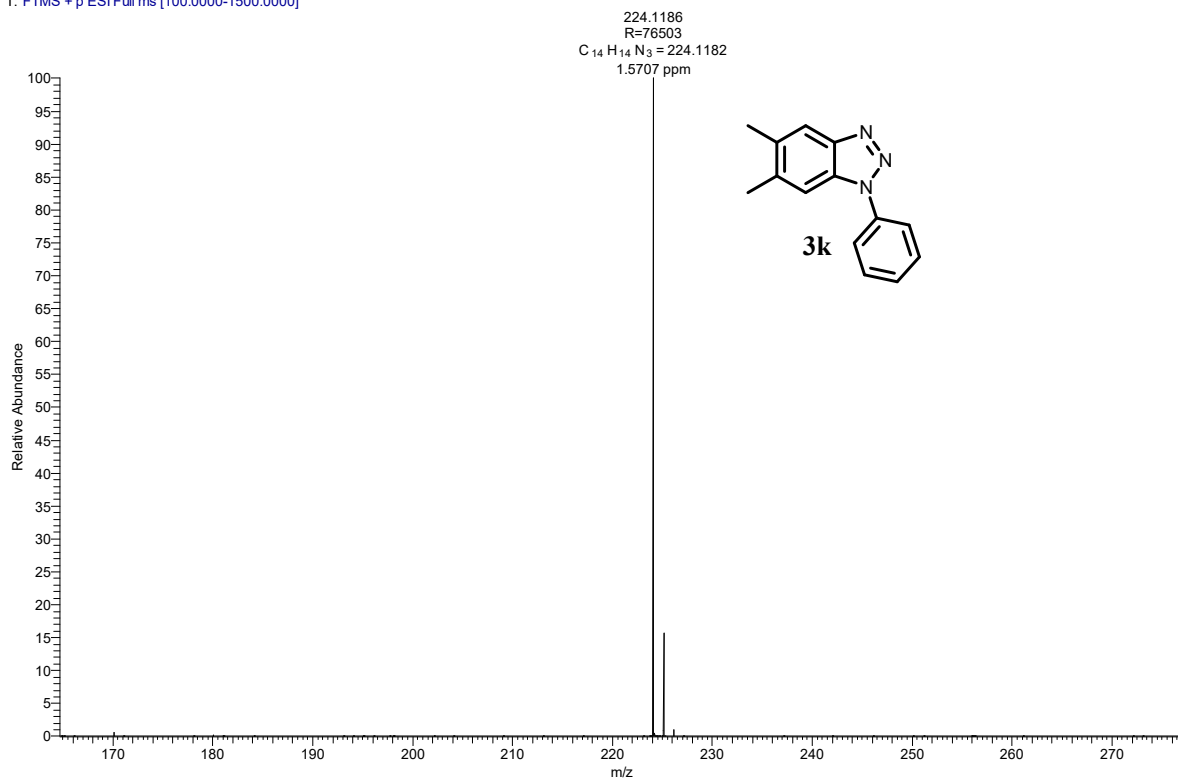

HRMS of Compound 3k

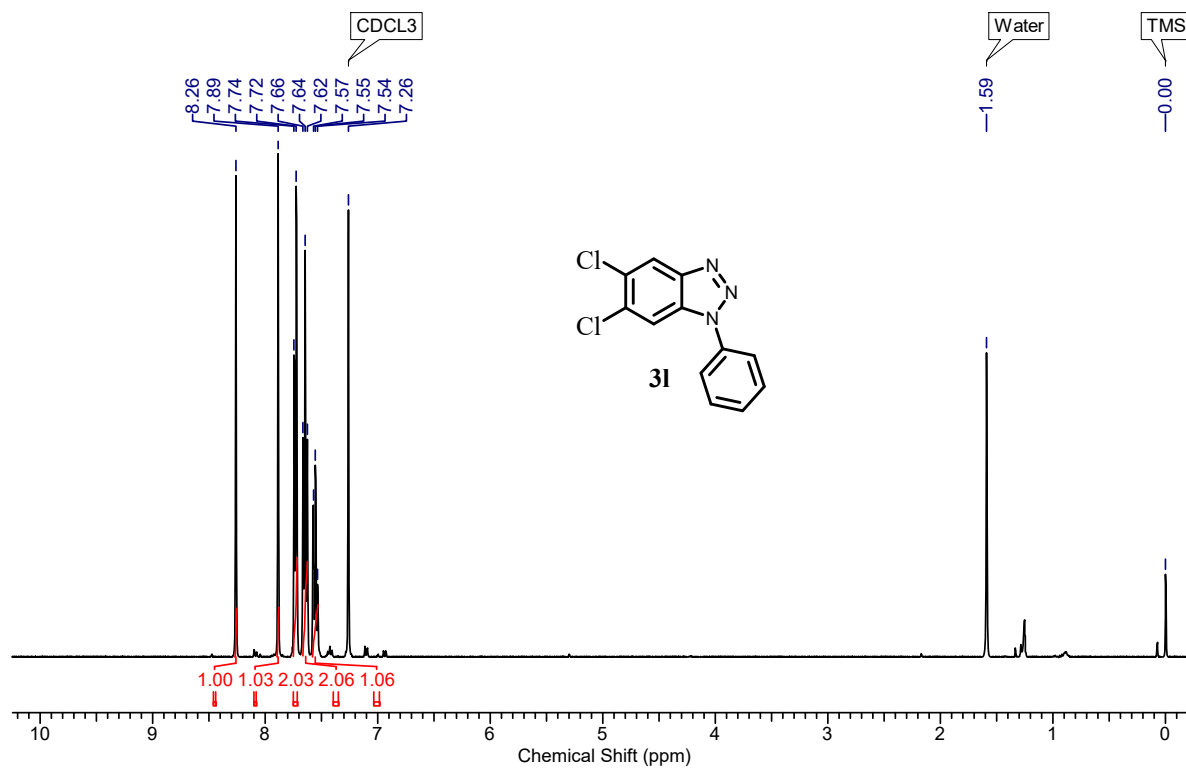

<sup>1</sup>H NMR (CDCl<sub>3</sub>, 400 MHz) of Compound 31

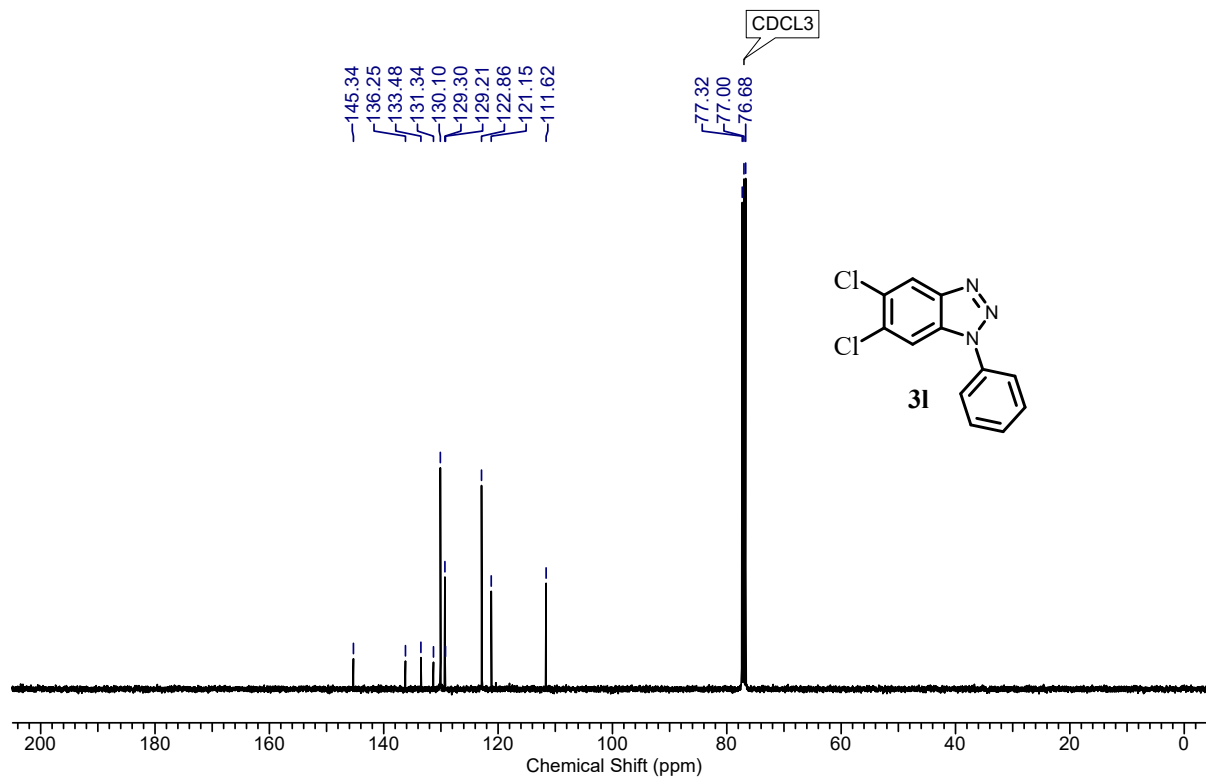

**<sup>13</sup>C NMR (CDCl<sub>3</sub>, 100 MHz) of Compound 31**

BTA-13 #356 RT: 2.24 AV: 1 NL: 8.43E7  
T: FTMS + p ESI Full ms [100.0000-1500.0000]

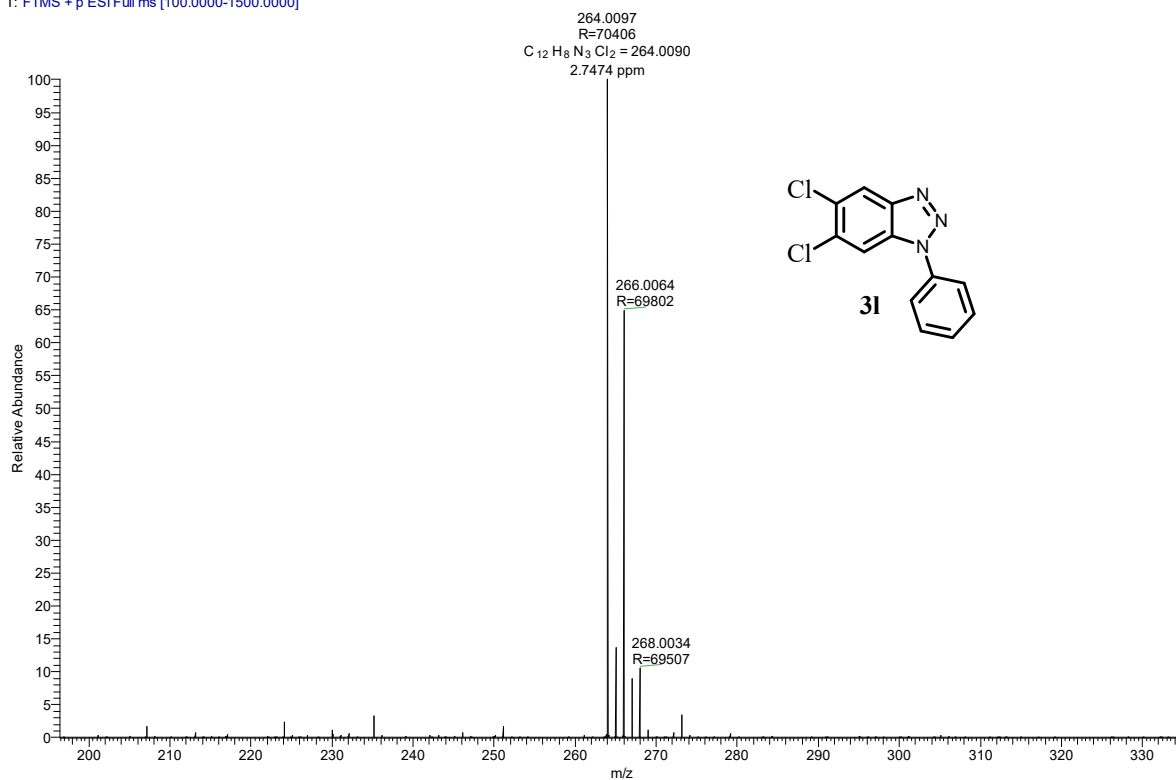

**HRMS of Compound 31**

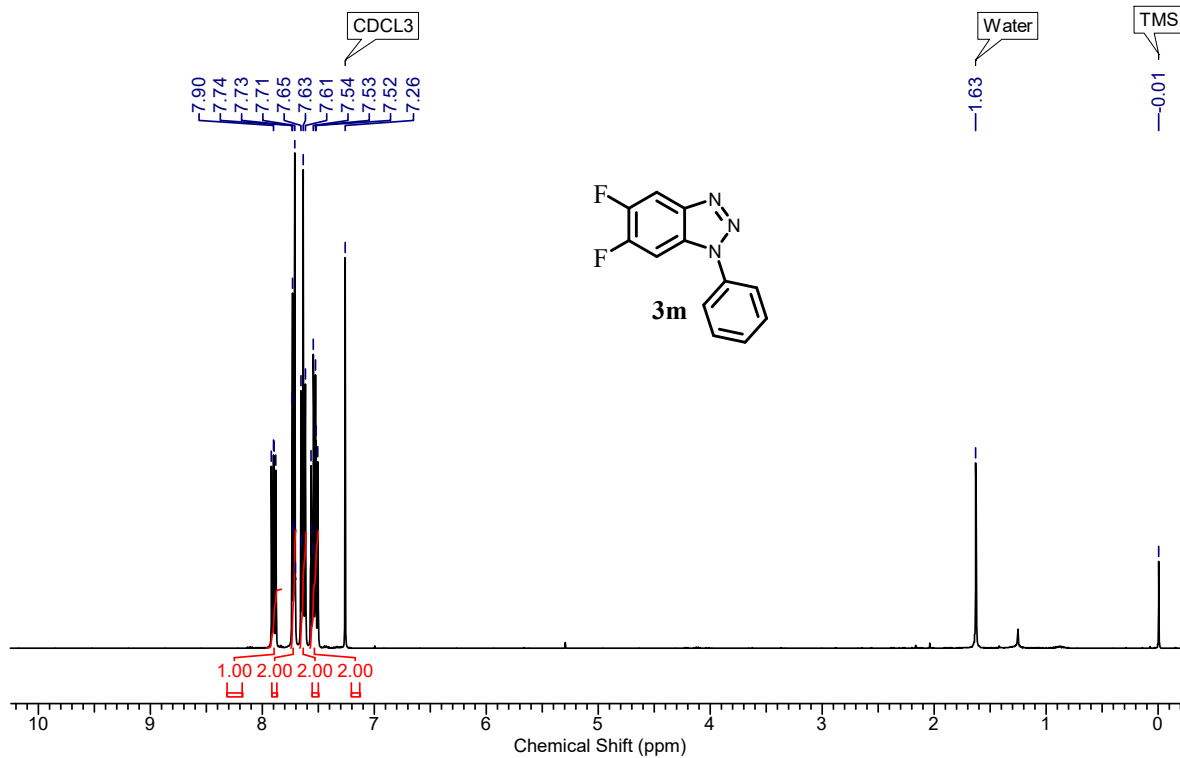

**<sup>1</sup>H NMR (CDCl<sub>3</sub>, 400 MHz) of Compound 3m**

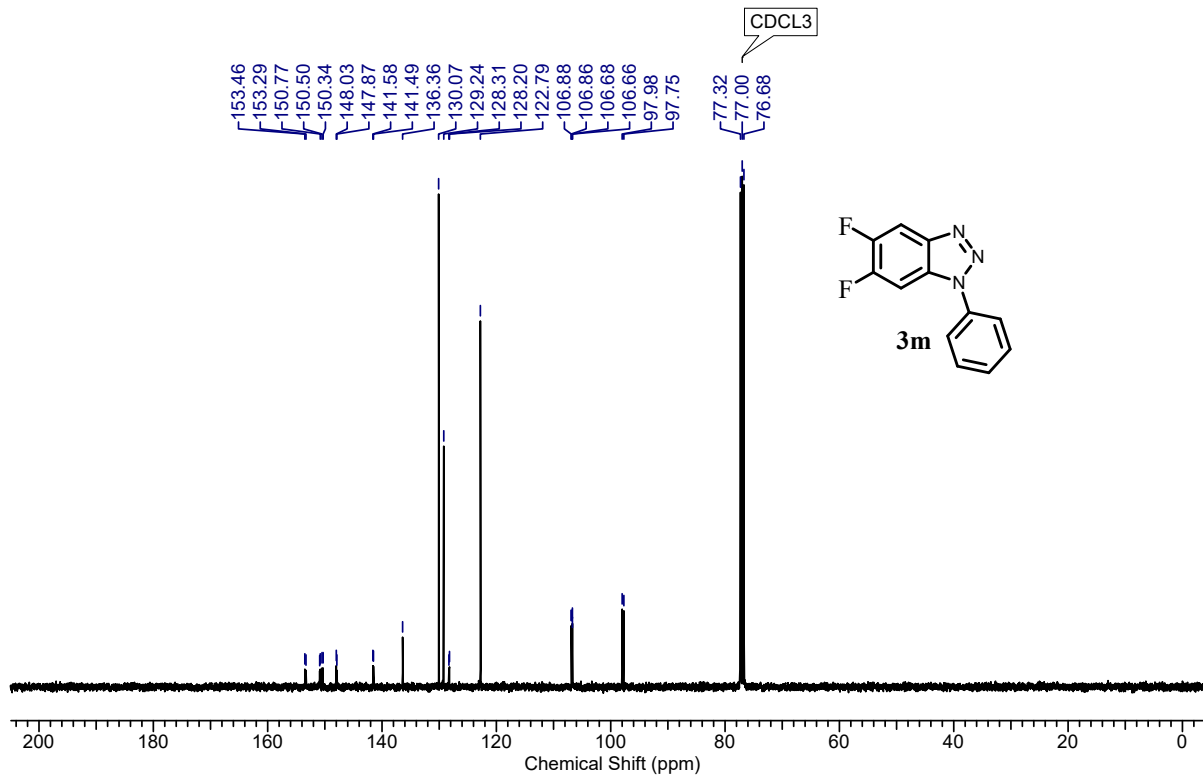

**<sup>13</sup>C NMR (CDCl<sub>3</sub>, 100 MHz) of Compound 3m**

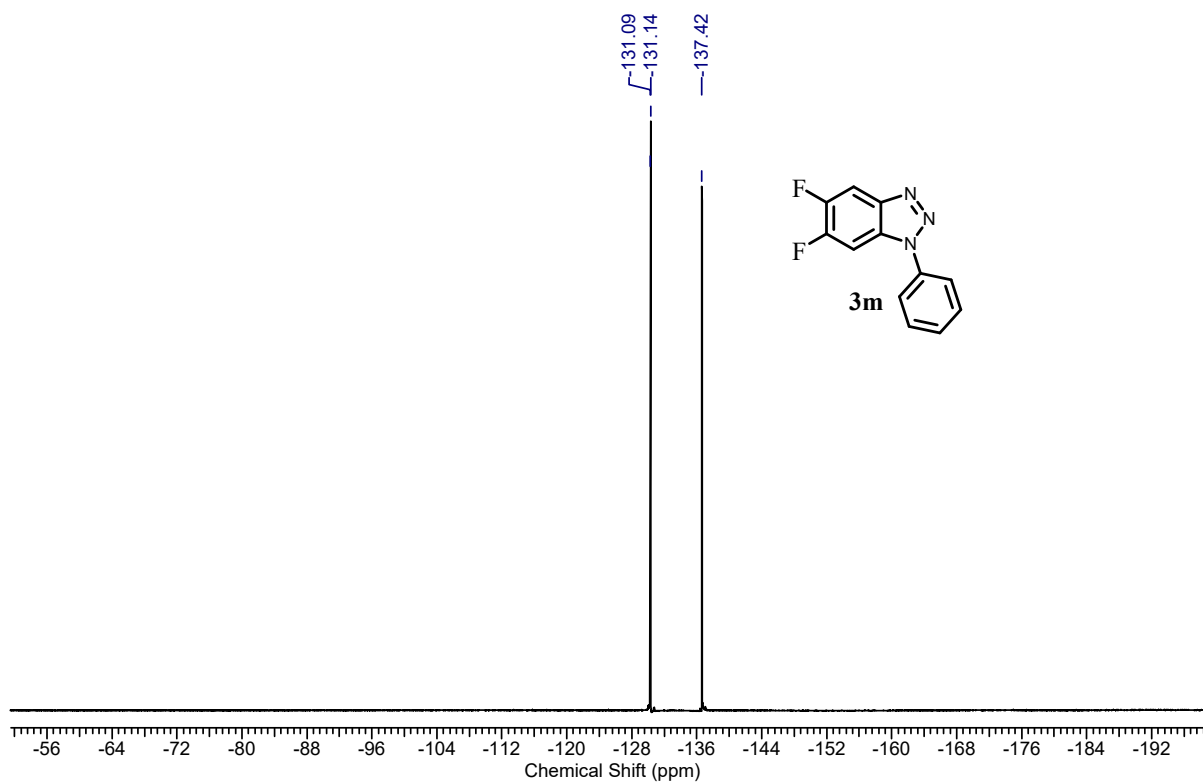

**$^{19}\text{F}$  NMR ( $\text{CDCl}_3$ , 376 MHz) of Compound 3m**

BTA-14 #354 RT: 1.95 AV: 1 NL: 3.38E8  
T: FTMS + p ESI Full ms [100.0000-1500.0000]

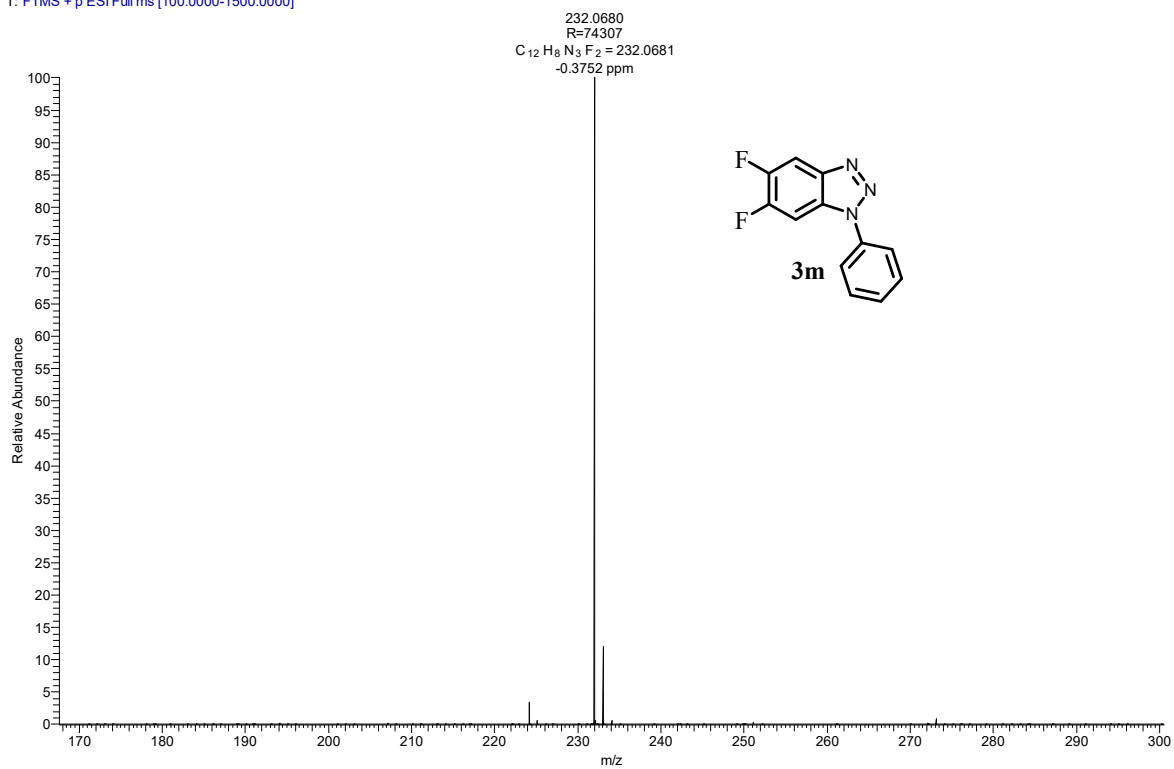

**HRMS of Compound 3m**

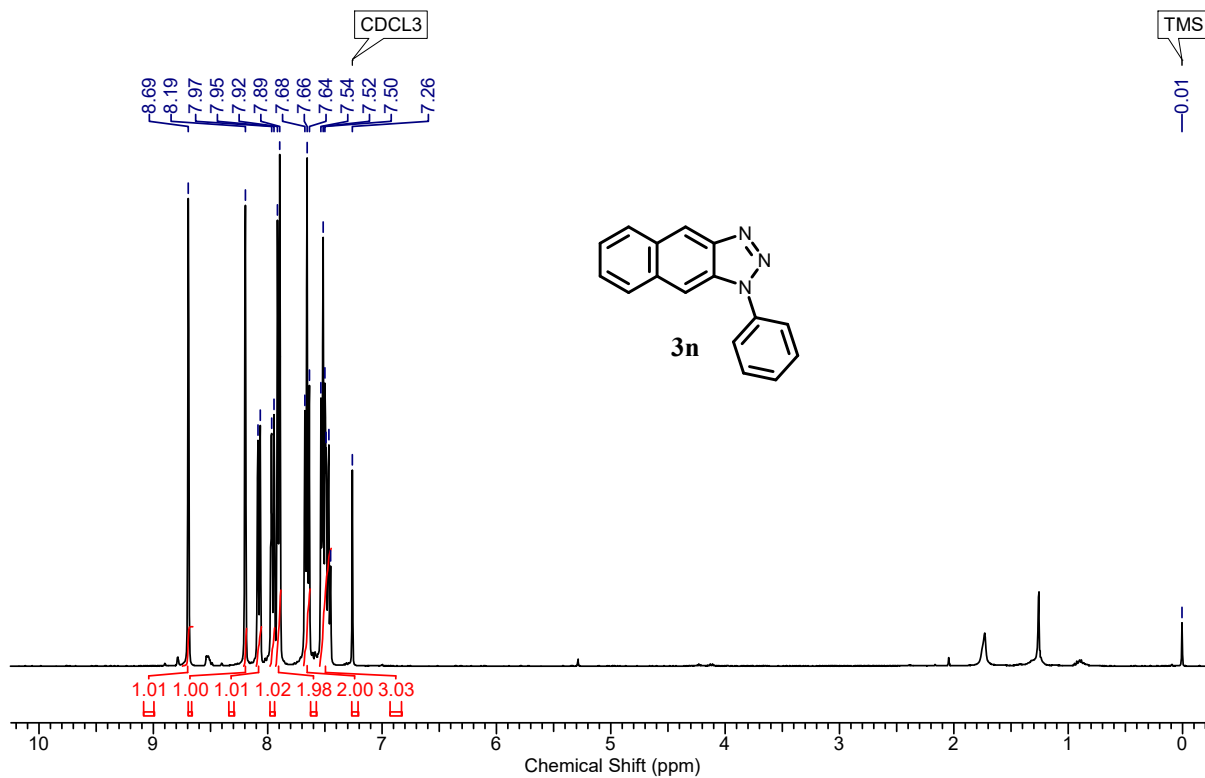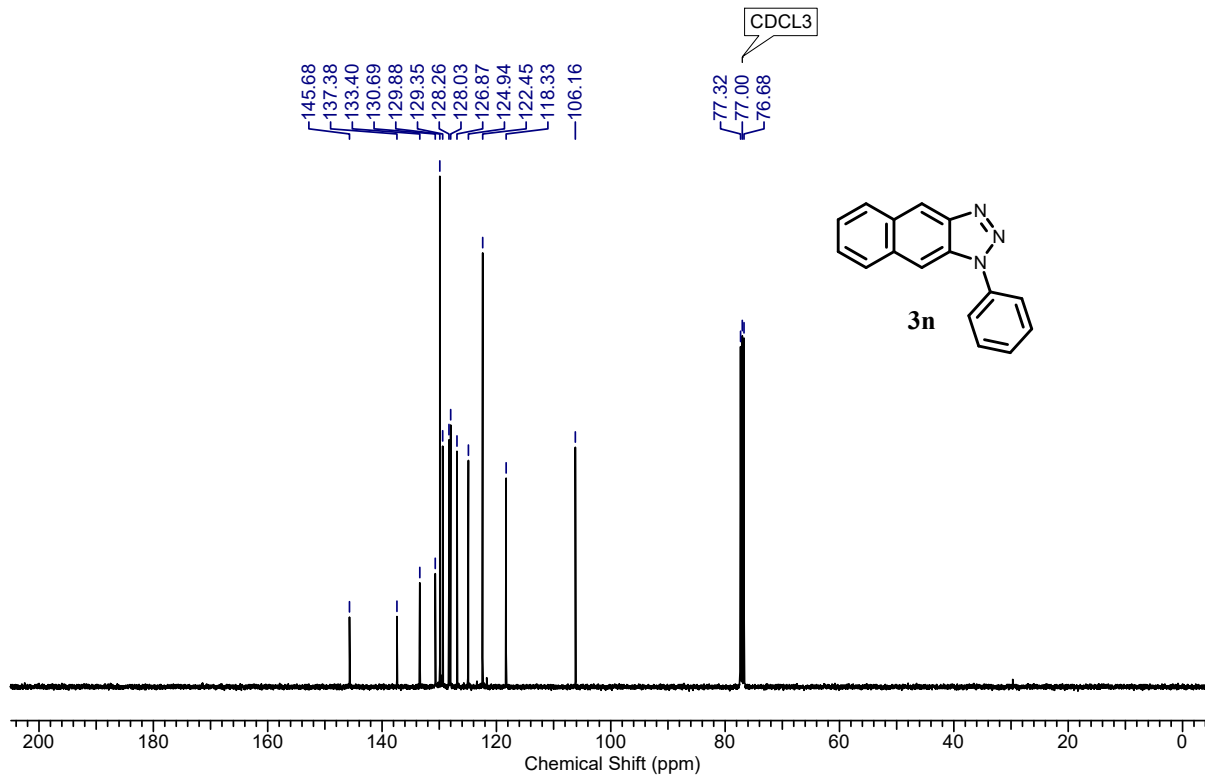

BTA-15 #369 RT: 2.28 AV: 1 NL: 6.26E7  
T: FTMS + p ESI Full ms [100.0000-1500.0000]

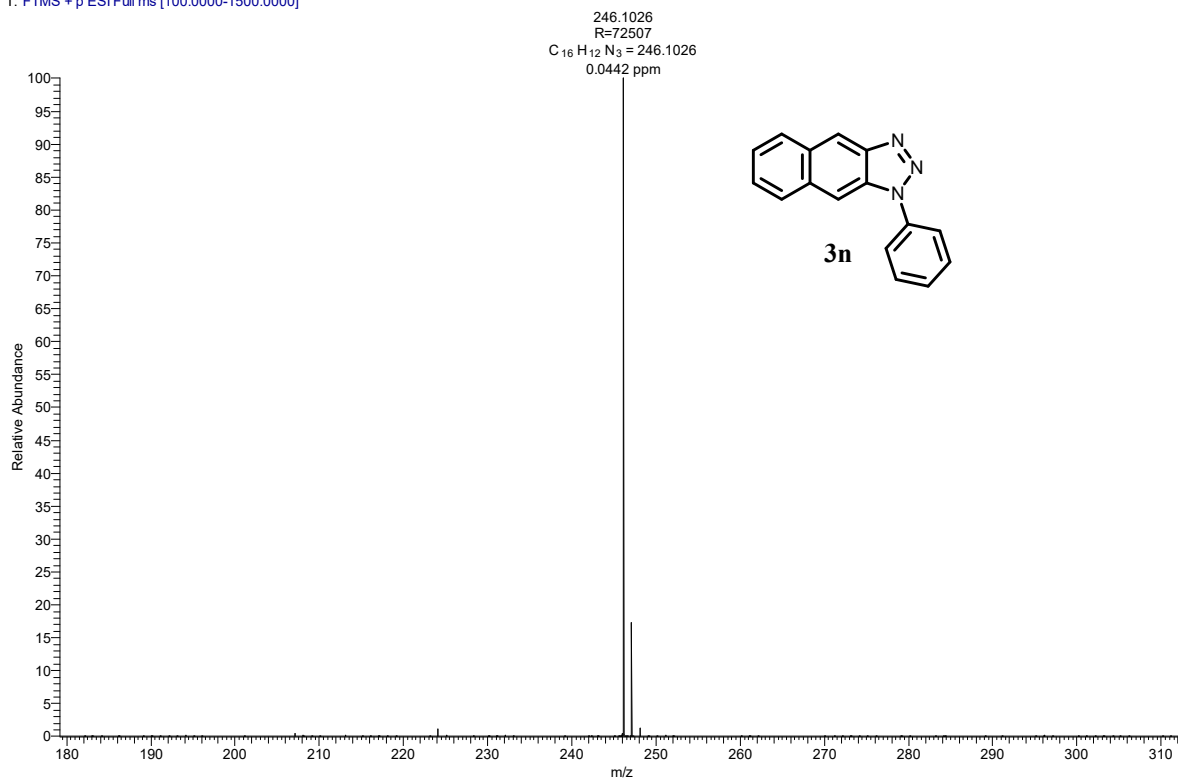

HRMS of Compound 3n

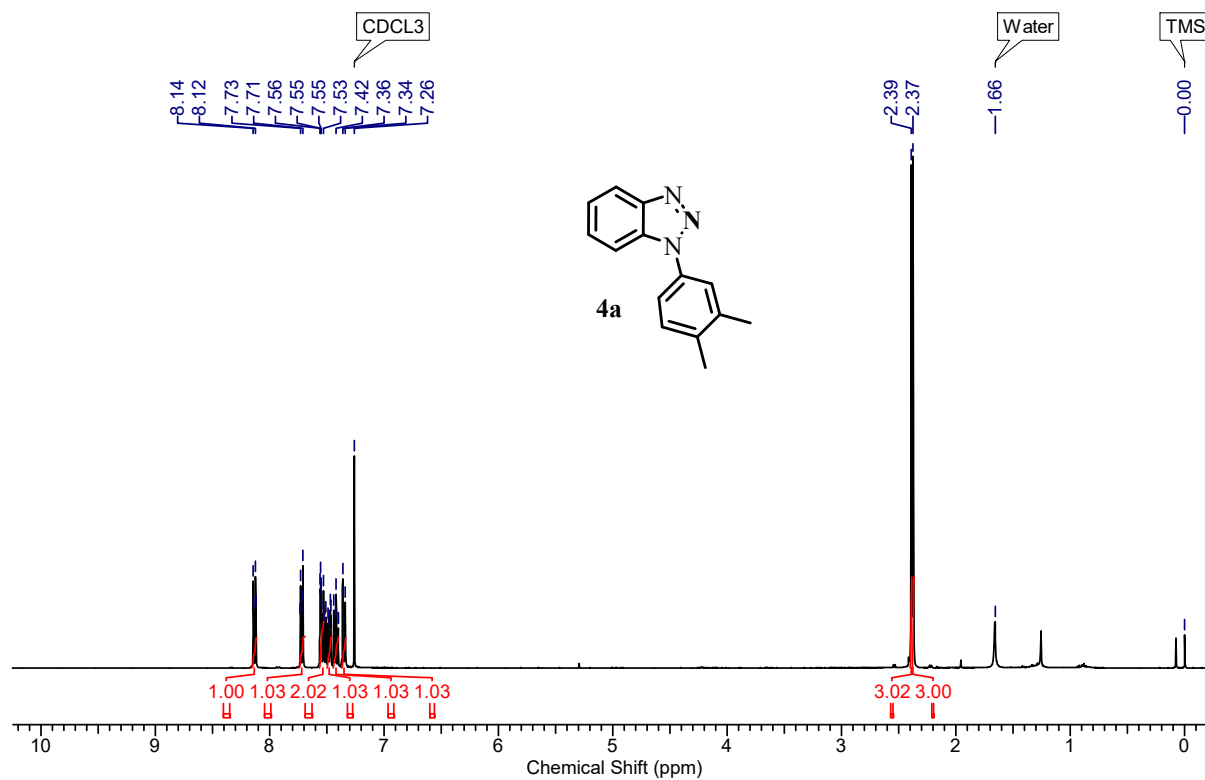

<sup>1</sup>H NMR (CDCl<sub>3</sub>, 400 MHz) of Compound 4a

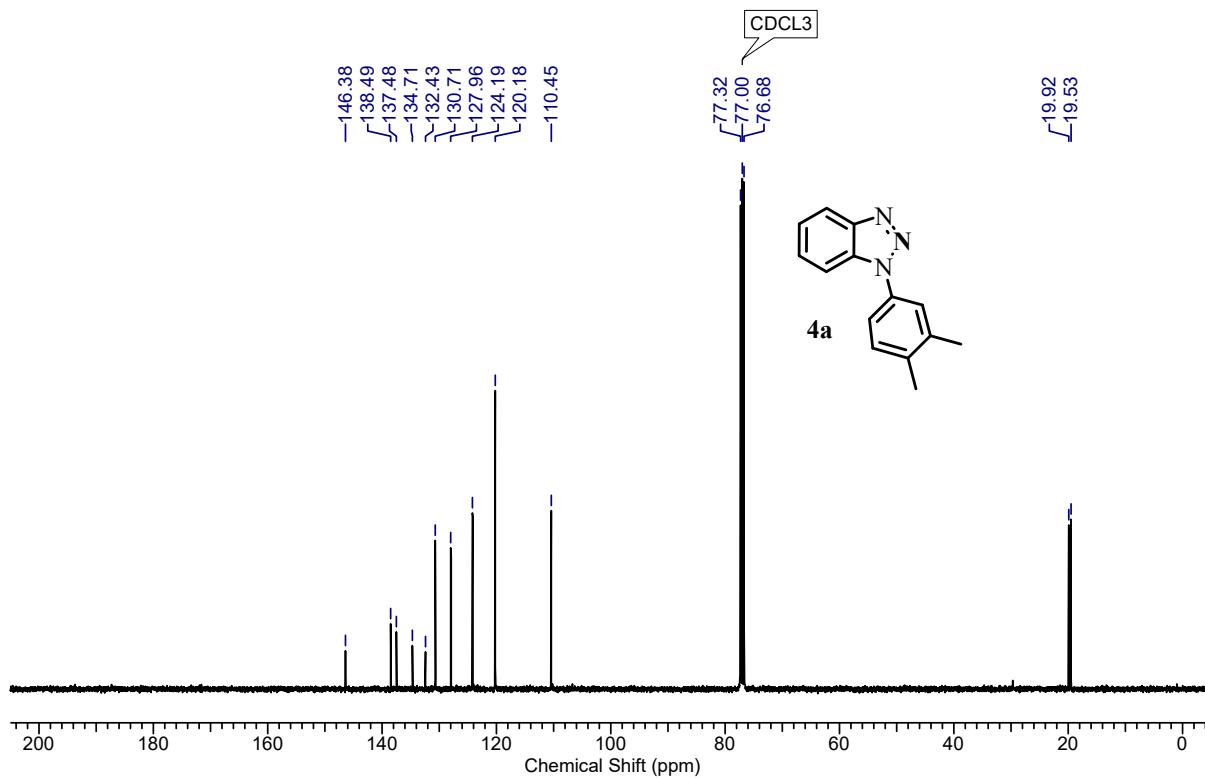

**<sup>13</sup>C NMR (CDCl<sub>3</sub>, 100 MHz) of Compound 4a**

BTA-19 #344 RT: 1.91 AV: 1 NL: 2.76E8  
T: FTMS + p ESI Full ms [100.0000-1500.0000]

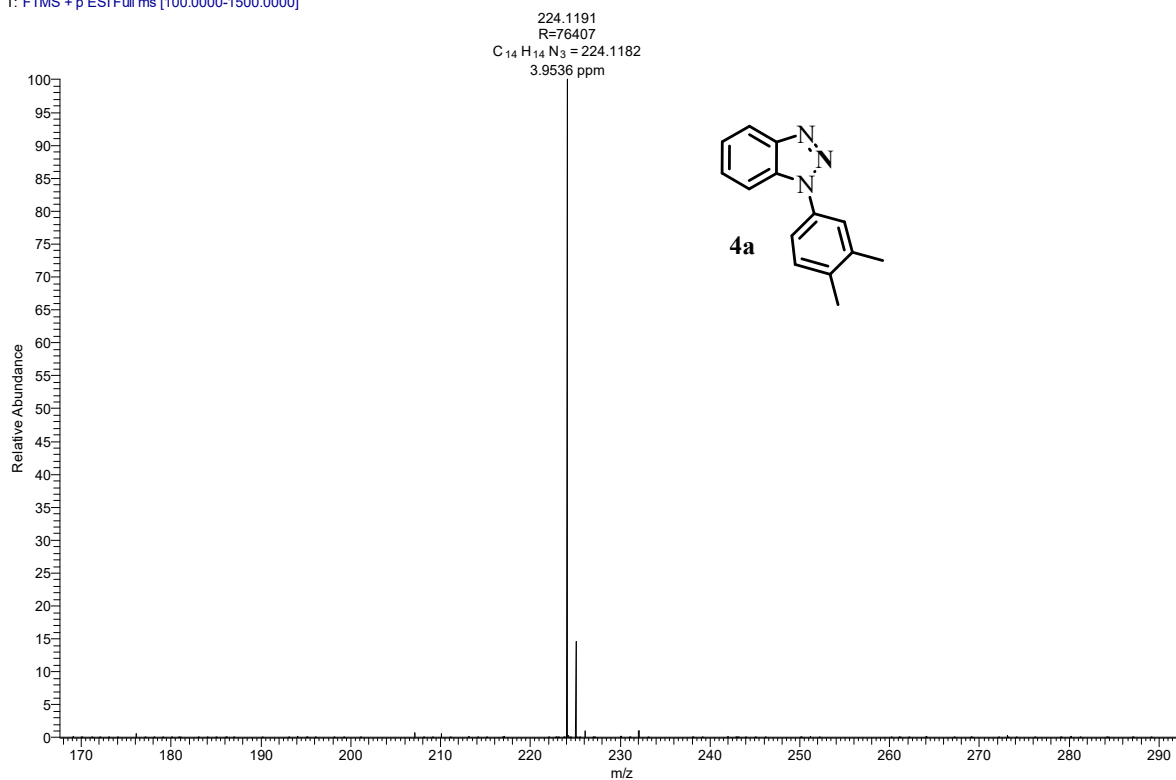

**HRMS of Compound 4a**

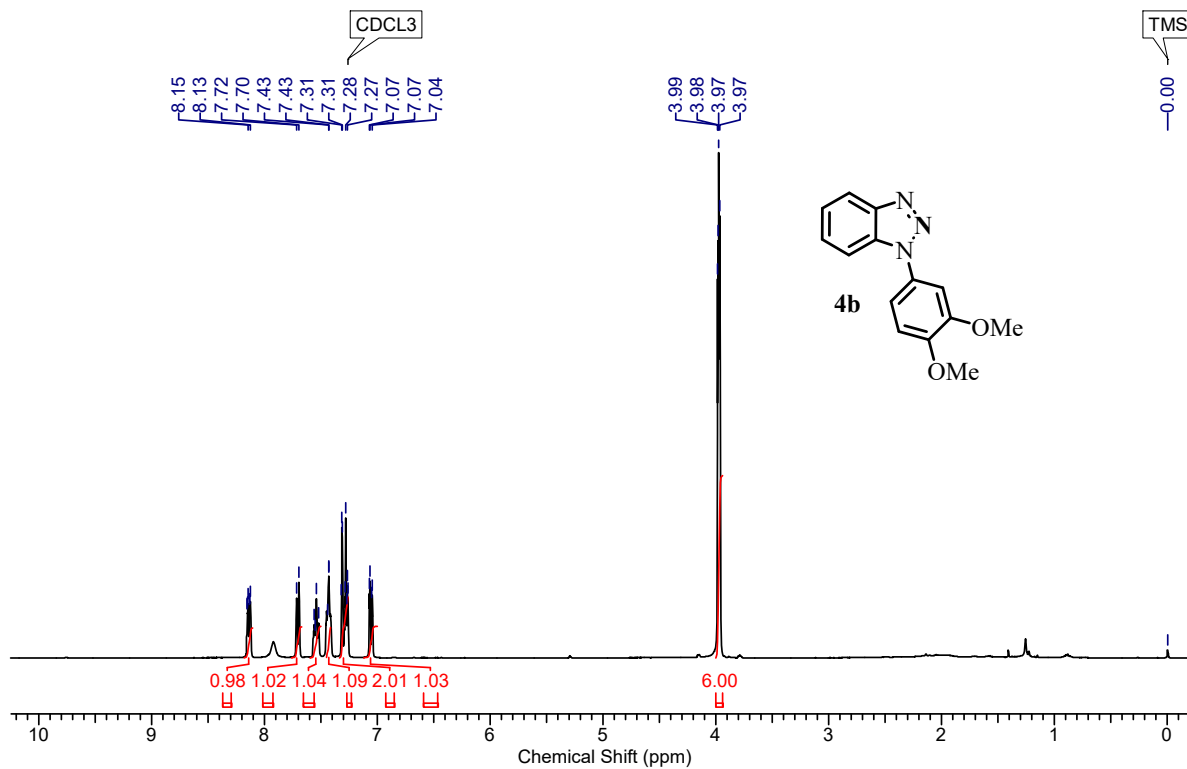

<sup>1</sup>H NMR (CDCl<sub>3</sub>, 400 MHz) of Compound 4b

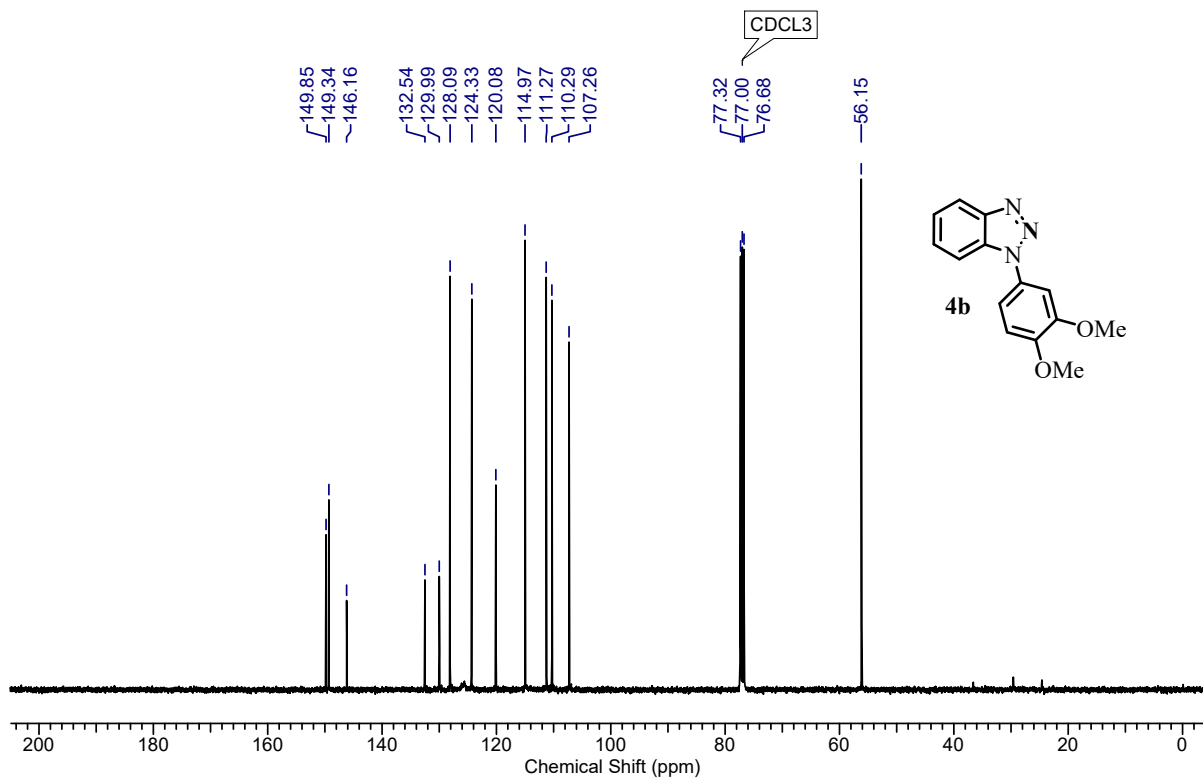

<sup>13</sup>C NMR (CDCl<sub>3</sub>, 100 MHz) of Compound 4b

BTA-20 #324 RT: 1.88 AV: 1 NL: 9.50E9  
T: FTMS + p ESI Full ms [100.0000-1500.0000]

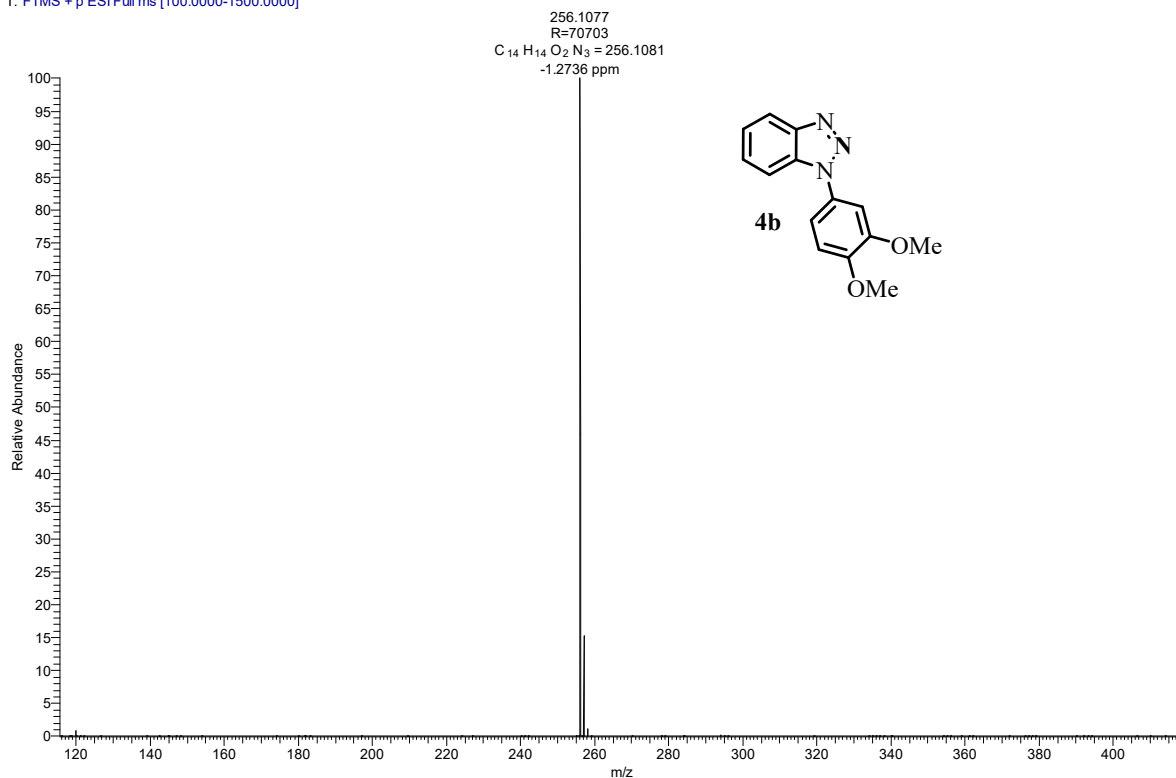

HRMS of Compound 4b

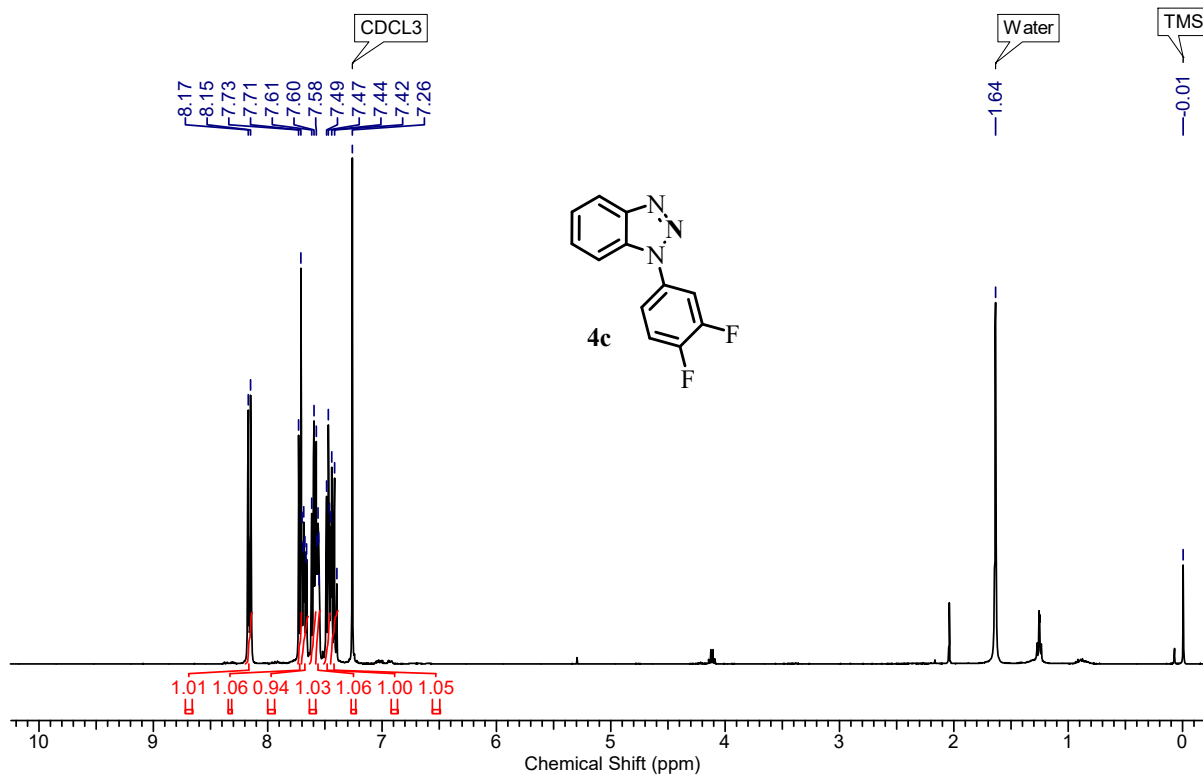

<sup>1</sup>H NMR (CDCl<sub>3</sub>, 400 MHz) of Compound 4c

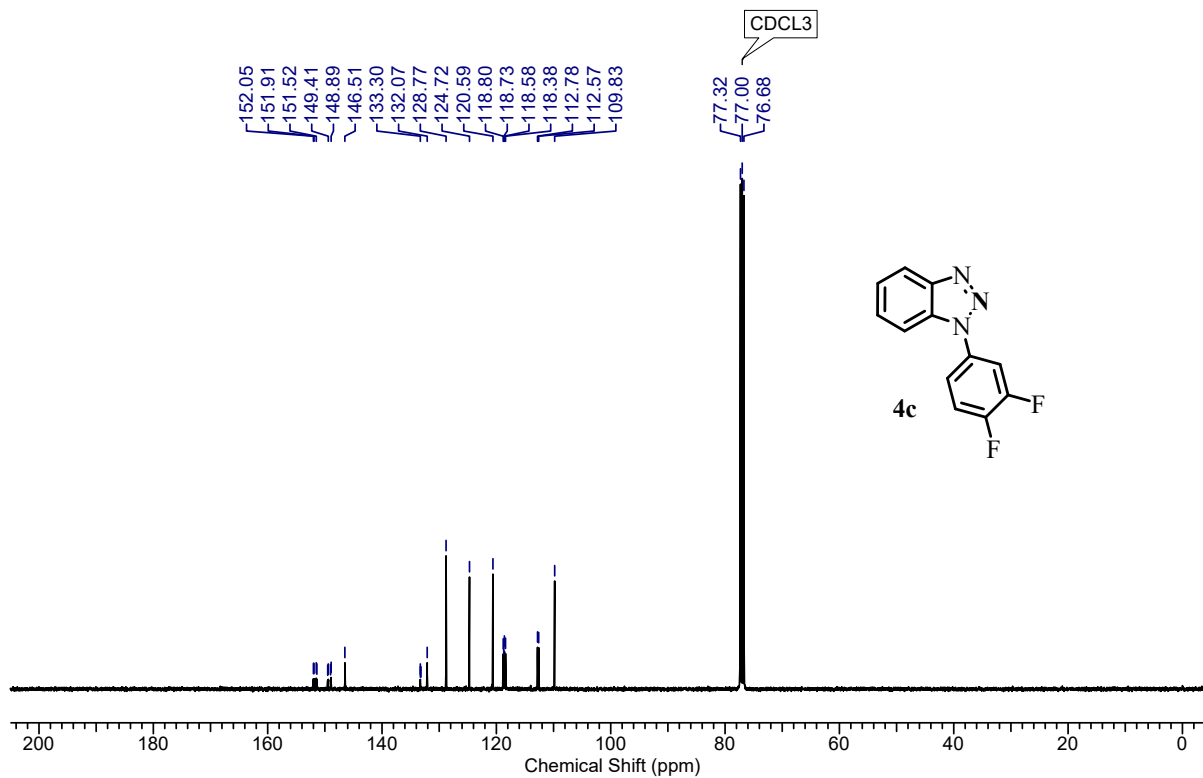

**<sup>13</sup>C NMR (CDCl<sub>3</sub>, 100 MHz) of Compound 4c**

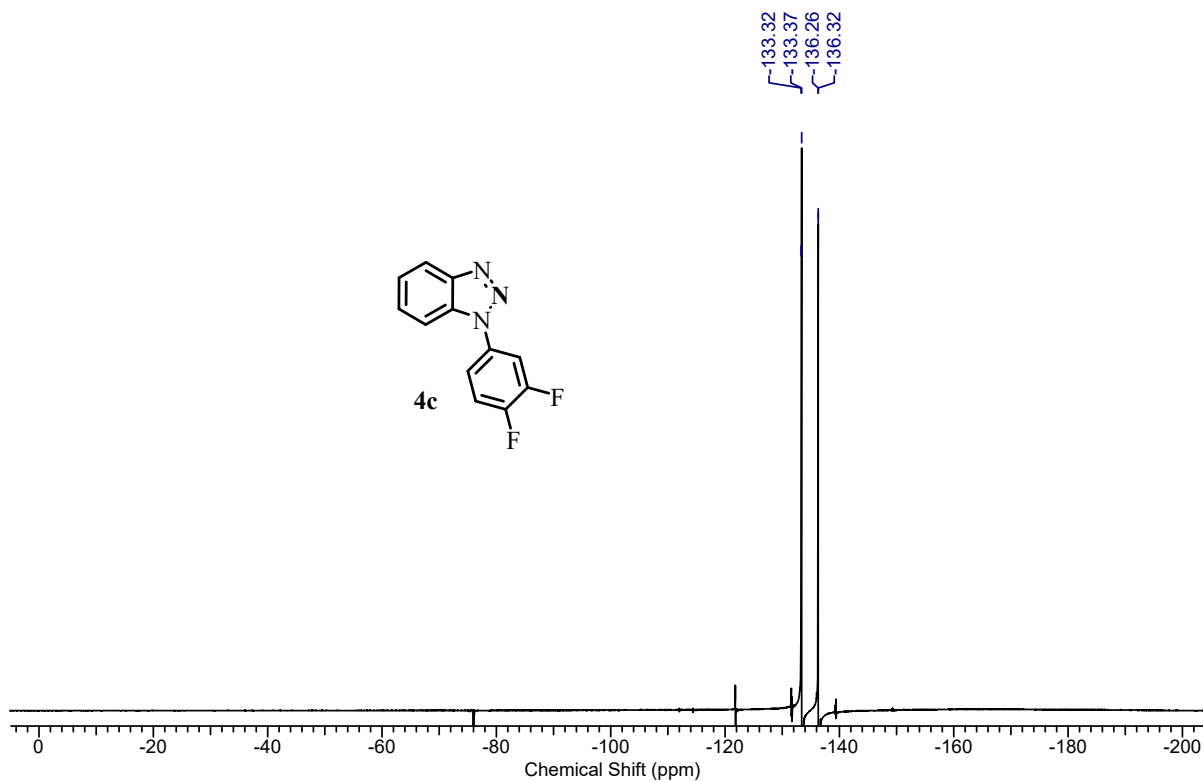

**<sup>19</sup>F NMR (CDCl<sub>3</sub>, 376 MHz) of Compound 4c**

BTA-21 #712 RT: 3.96 AV: 1 NL: 2.25E6  
T: FTMS + p ESI Full ms [100.0000-1500.0000]

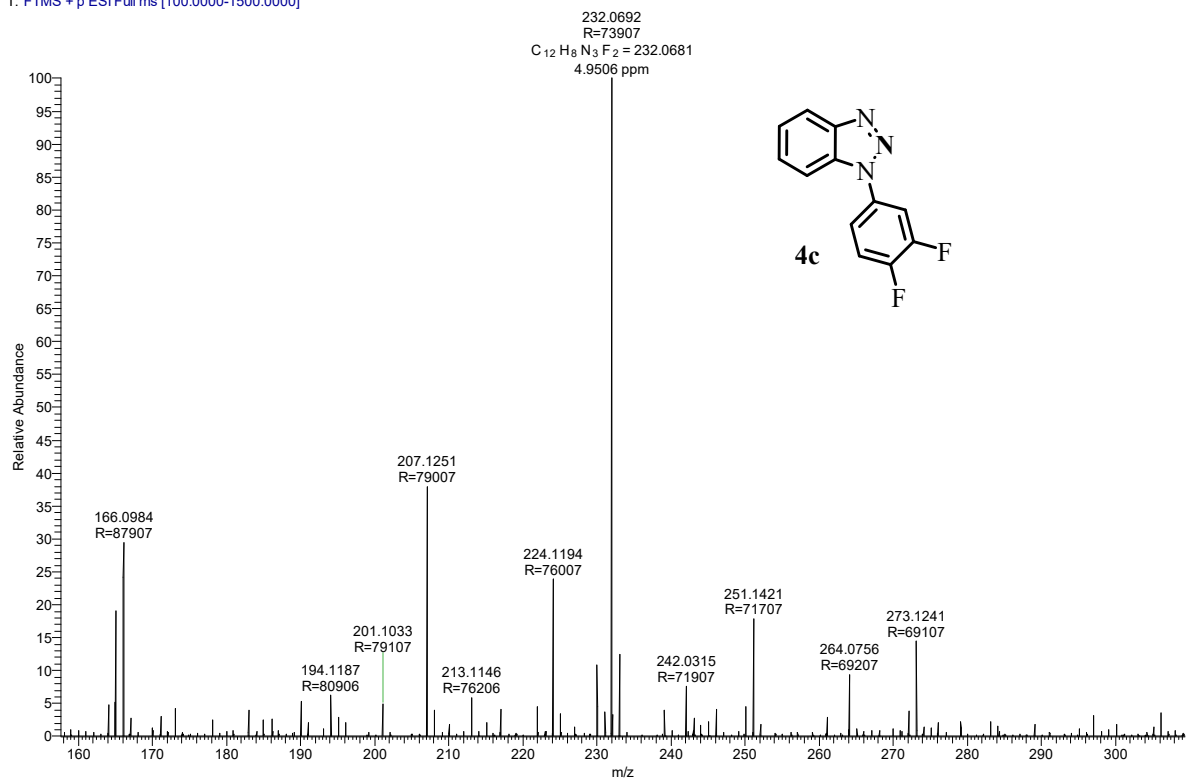

HRMS of Compound 4c

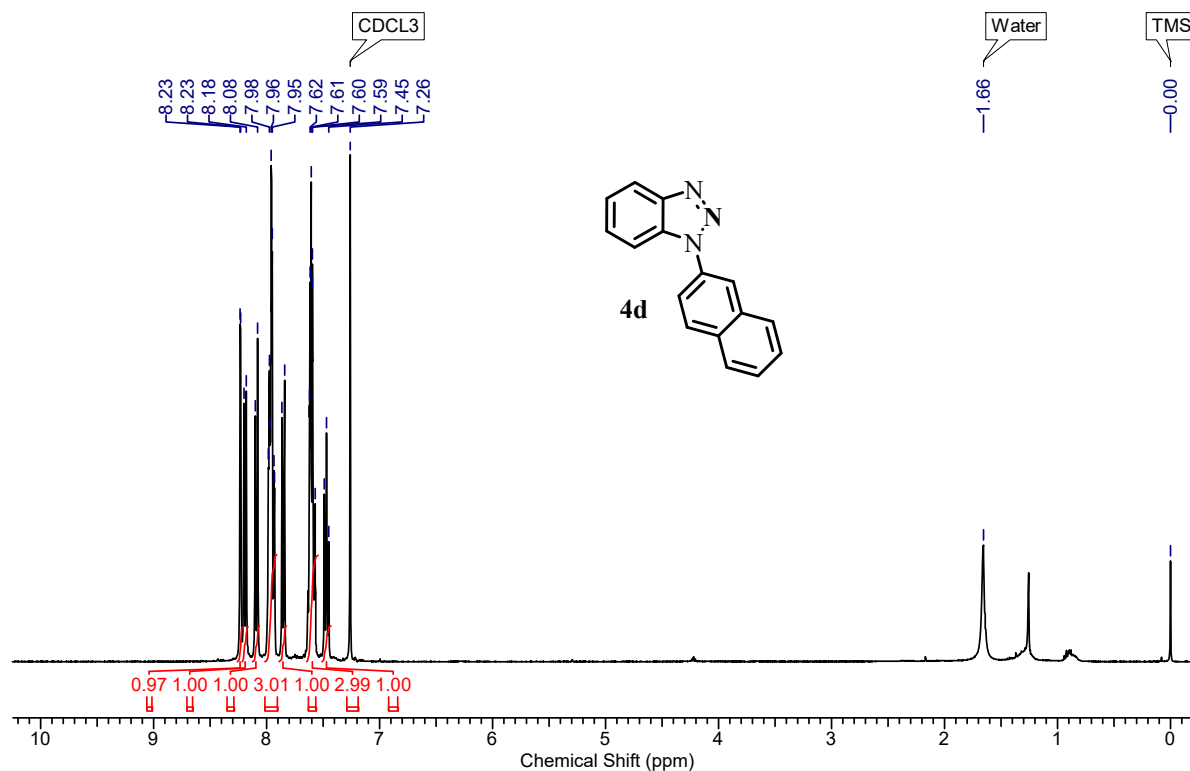

<sup>1</sup>H NMR (CDCl<sub>3</sub>, 400 MHz) of Compound 4d

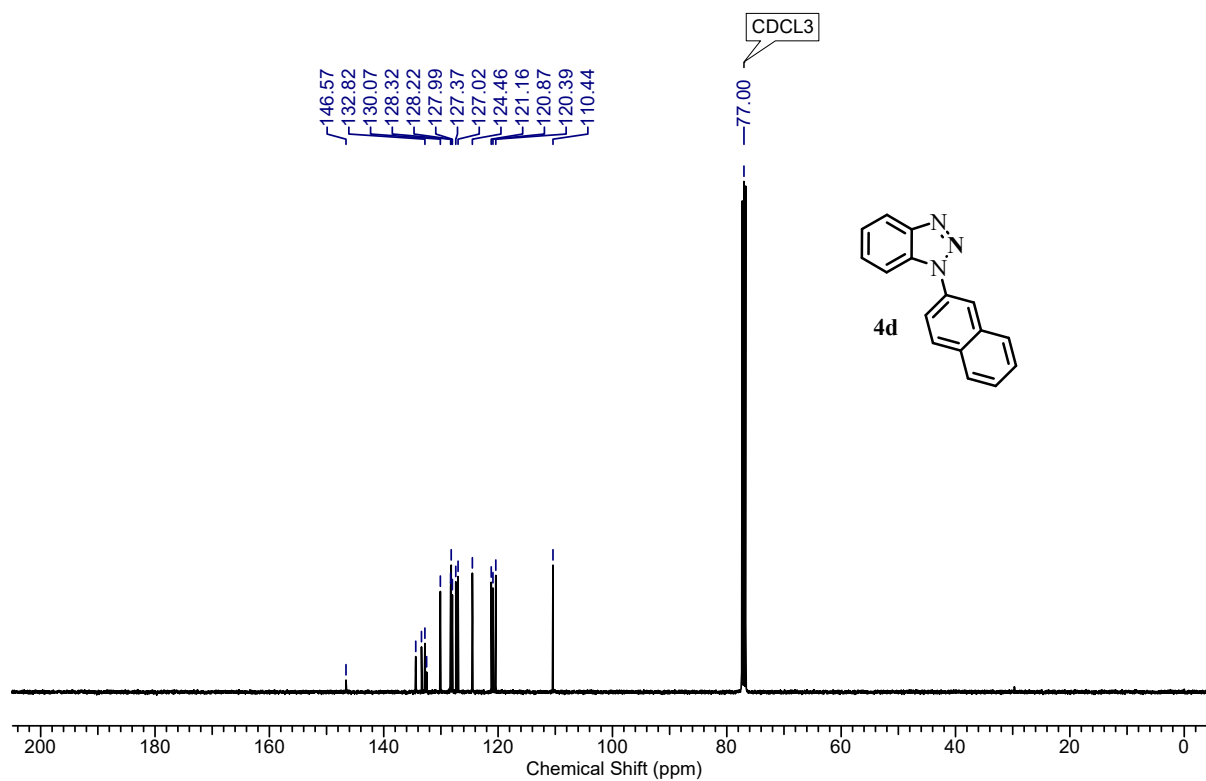

**<sup>13</sup>C NMR (CDCl<sub>3</sub>, 100 MHz) of Compound 4d**

BTA-22 #367 RT: 2.02 AV: 1 NL: 6.86E8  
T: FTMS + p ESI Full ms [100.0000-1500.0000]

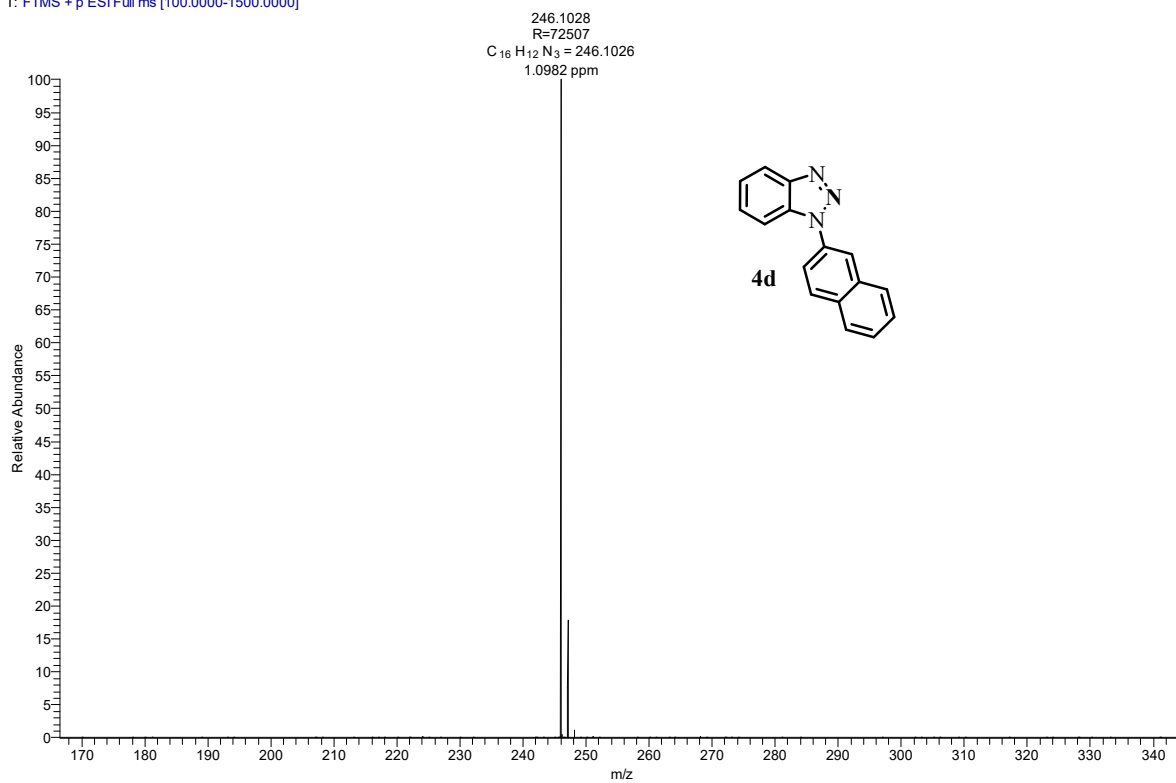

**HRMS of Compound 4d**

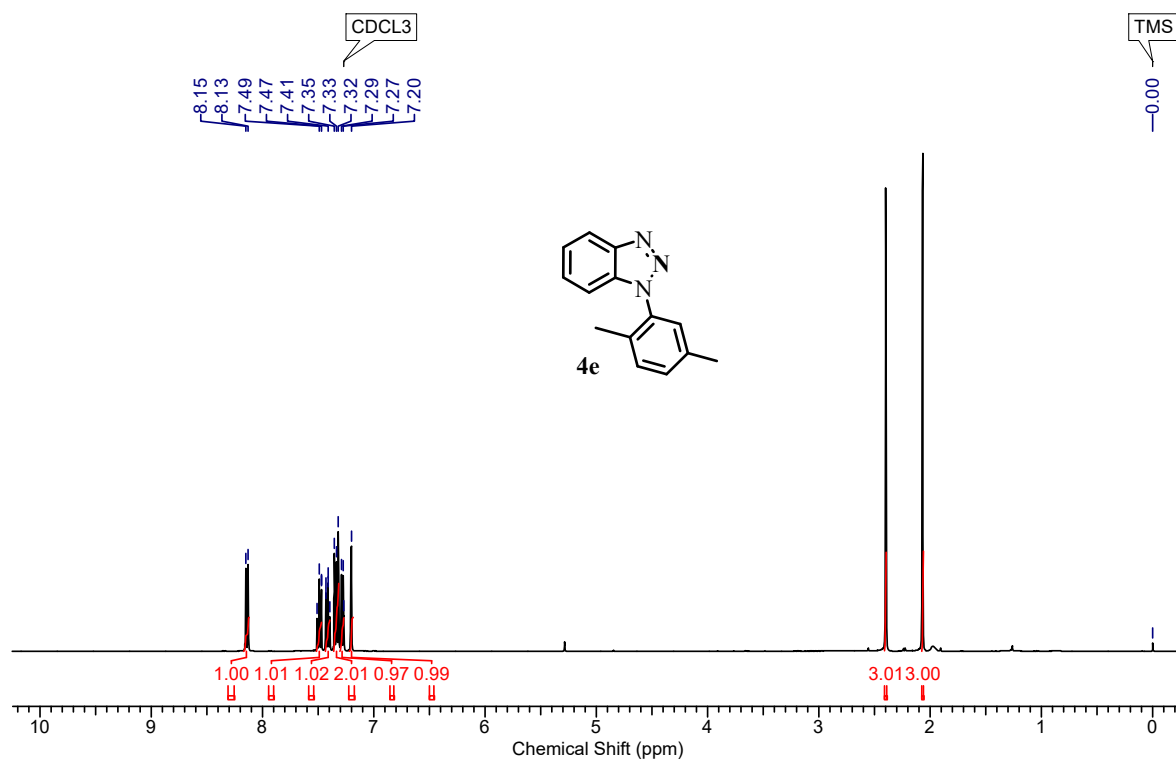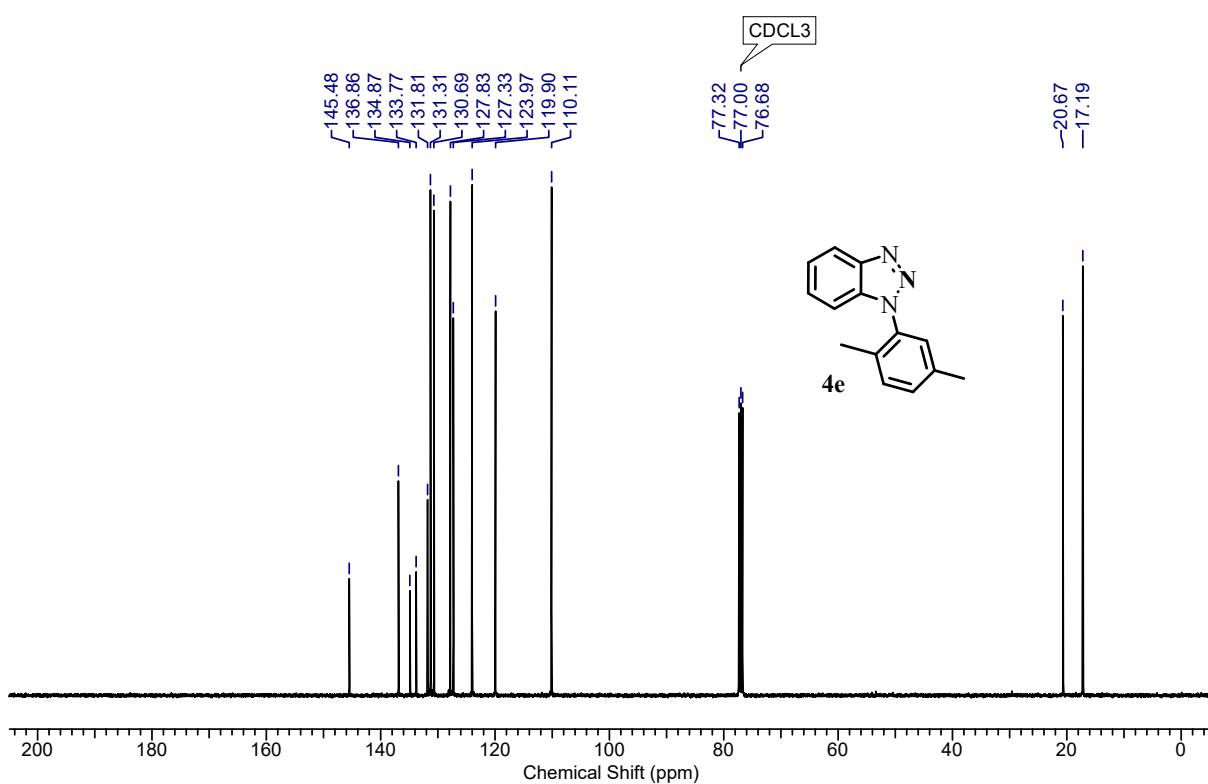

BTA-26 #366 RT: 2.11 AV: 1 NL: 1.53E10  
T: FTMS + p ESI Full ms [100.0000-1500.0000]

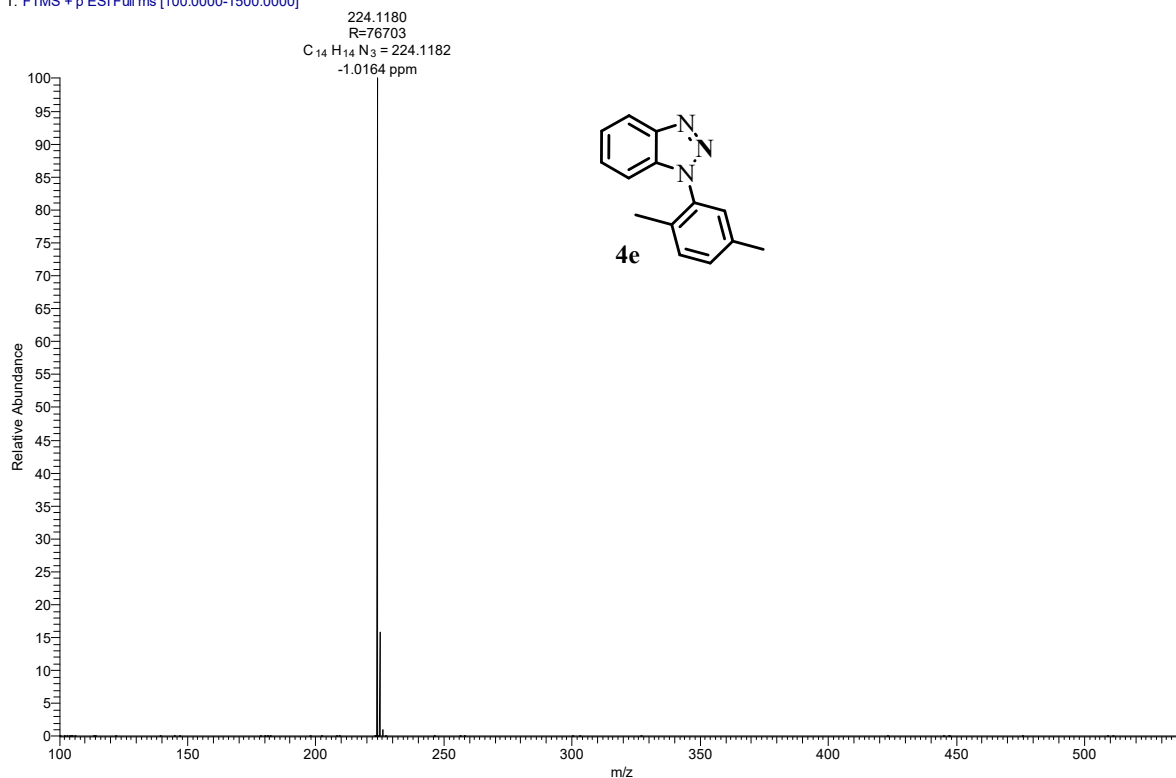

HRMS of Compound 4e

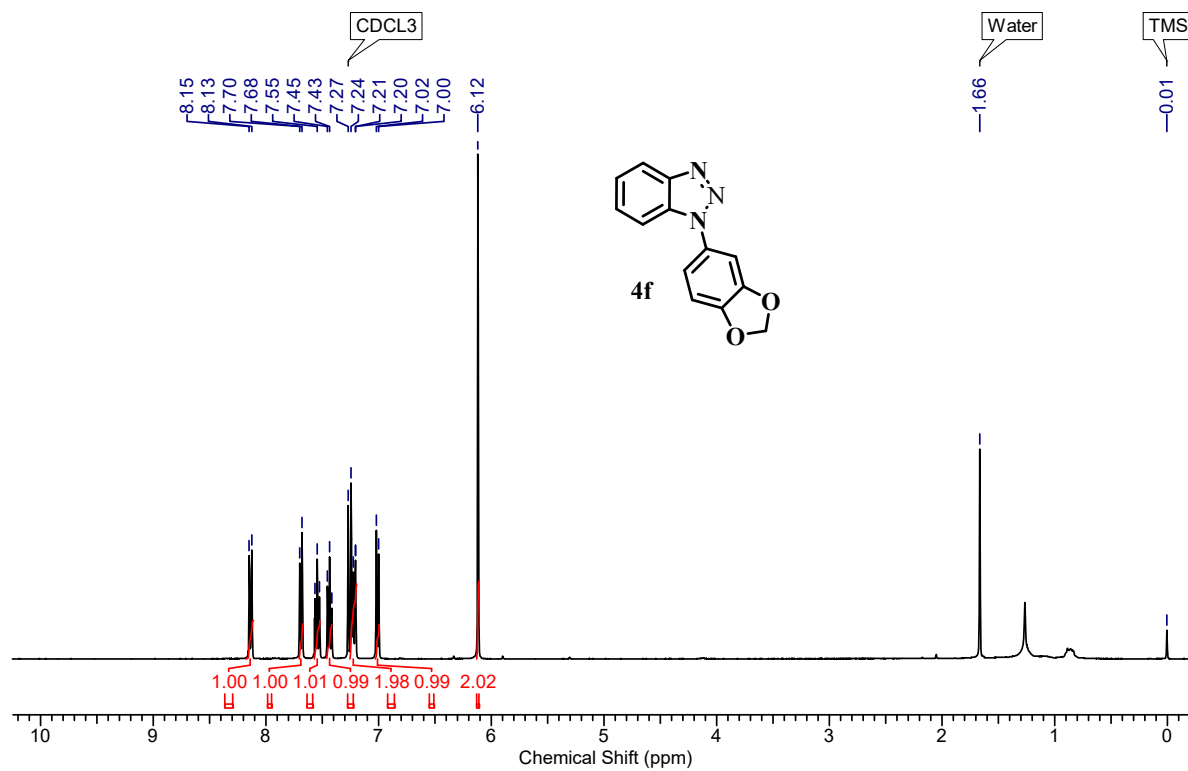

<sup>1</sup>H NMR (CDCl<sub>3</sub>, 400 MHz) of Compound 4f

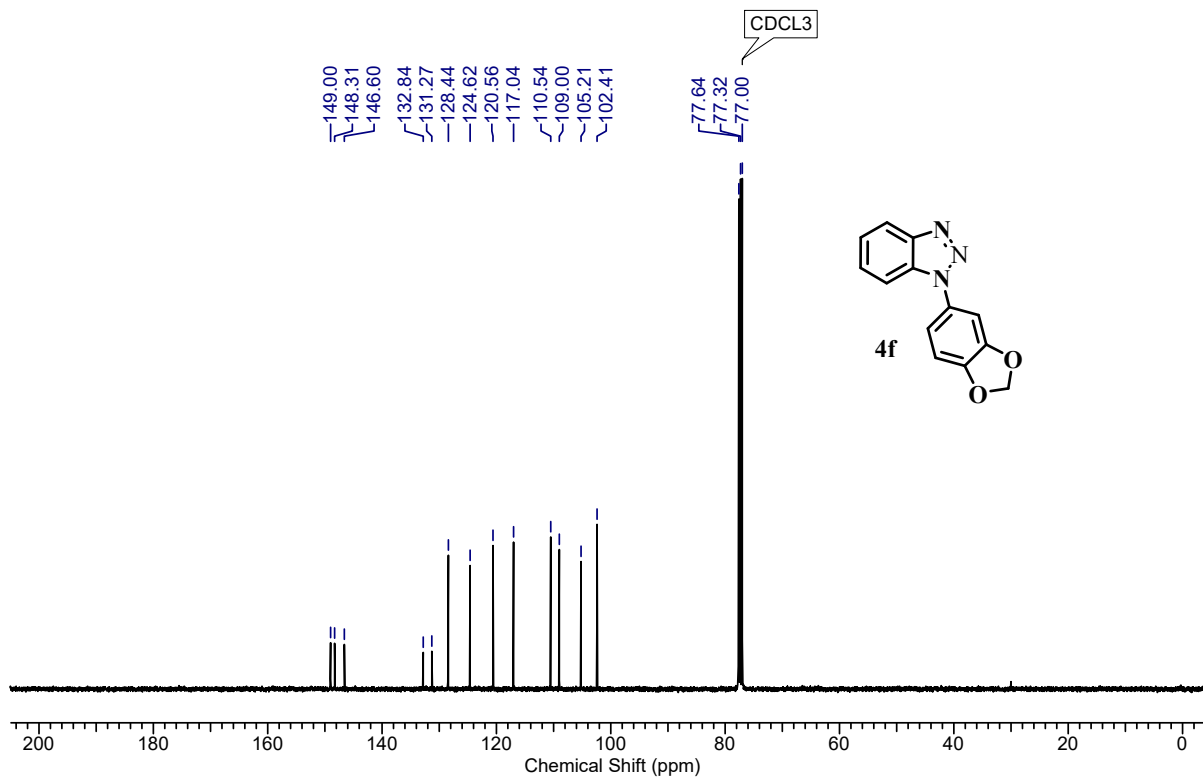

**<sup>13</sup>C NMR (CDCl<sub>3</sub>, 100 MHz) of Compound 4f**

BTA-27 #318 RT: 1.86 AV: 1 NL: 5.17E9  
T: FTMS + p ESI Full ms [100.0000-1500.0000]

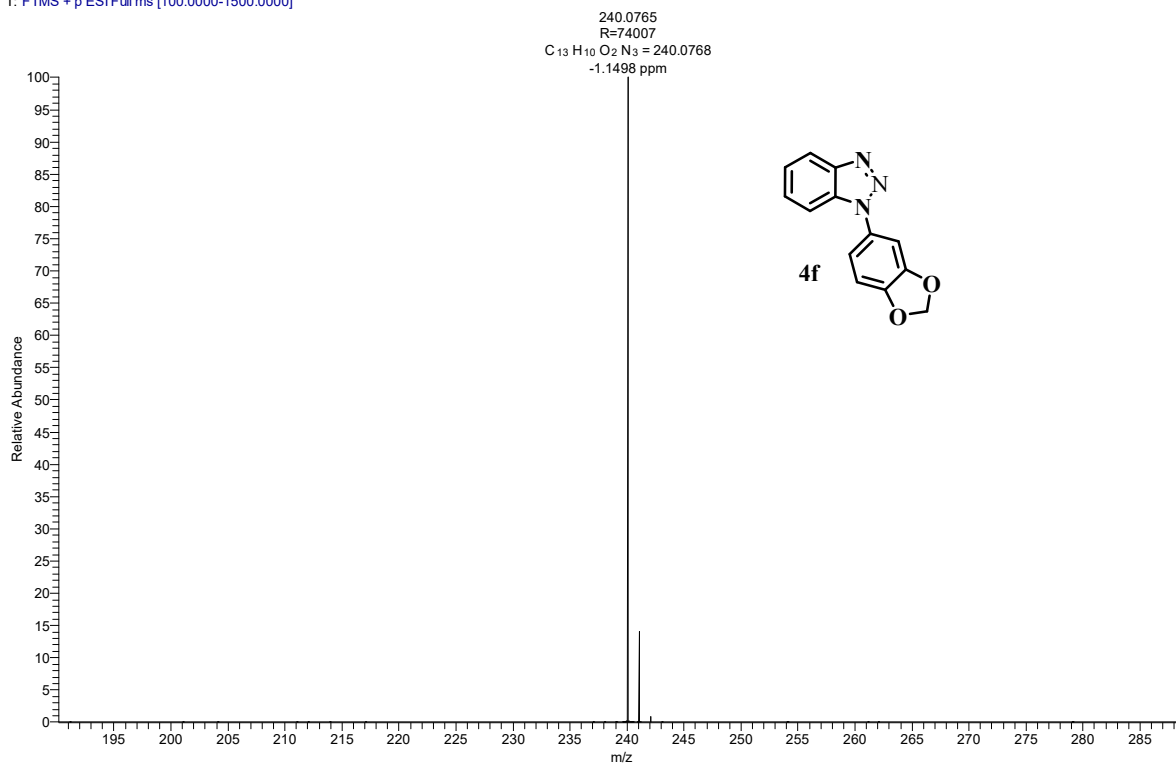

**HRMS of Compound 4f**

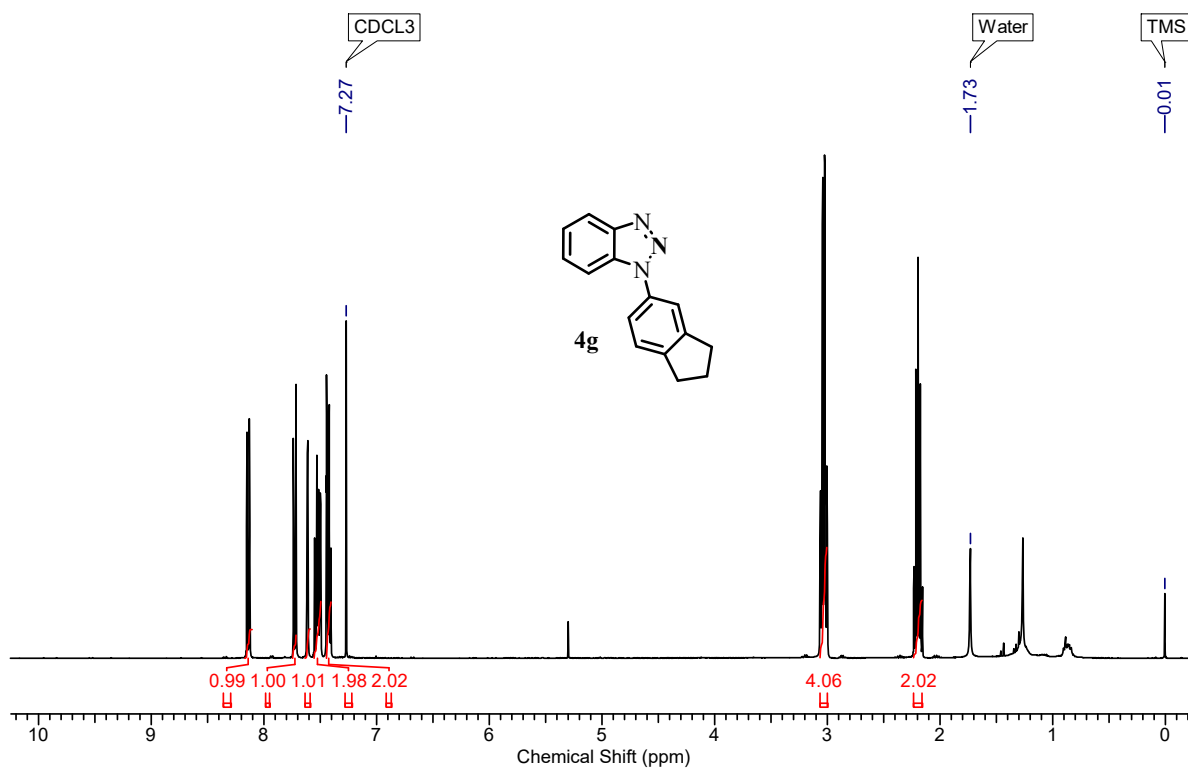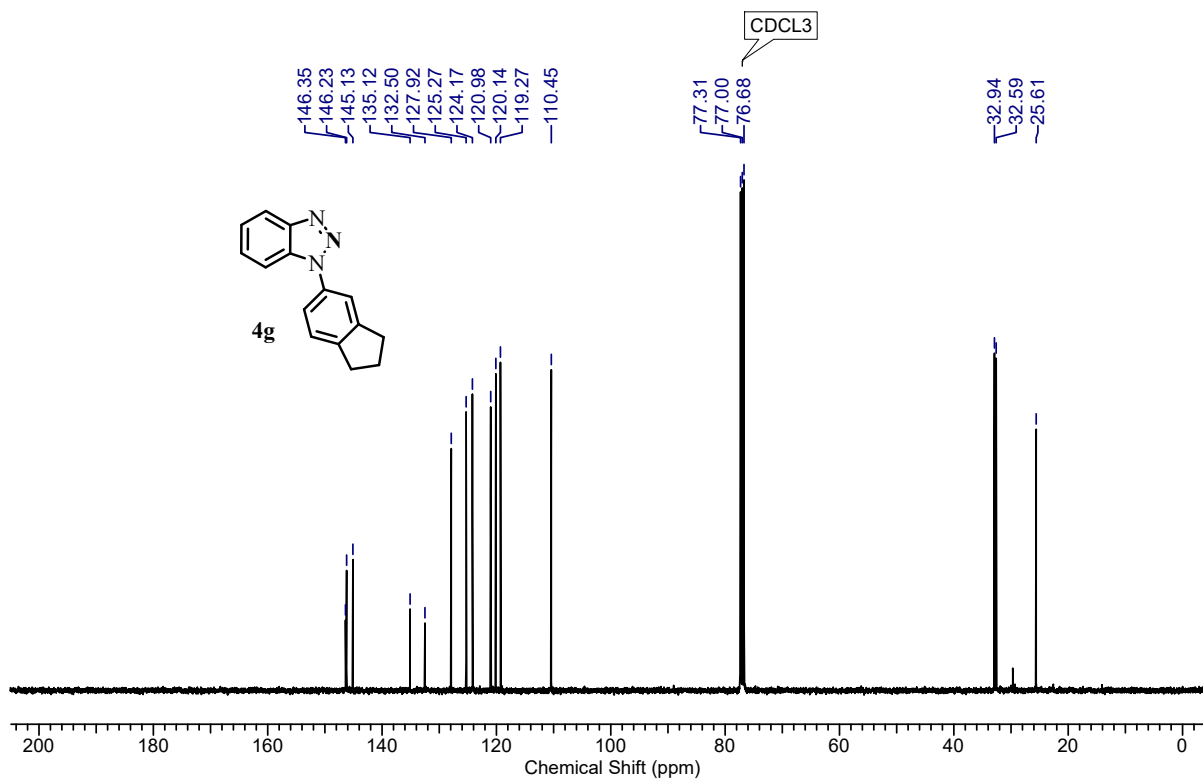

BTA-28 #491 RT: 2.84 AV: 1 NL: 8.27E7  
T: FTMS + p ESI Full ms [100.0000-1500.0000]

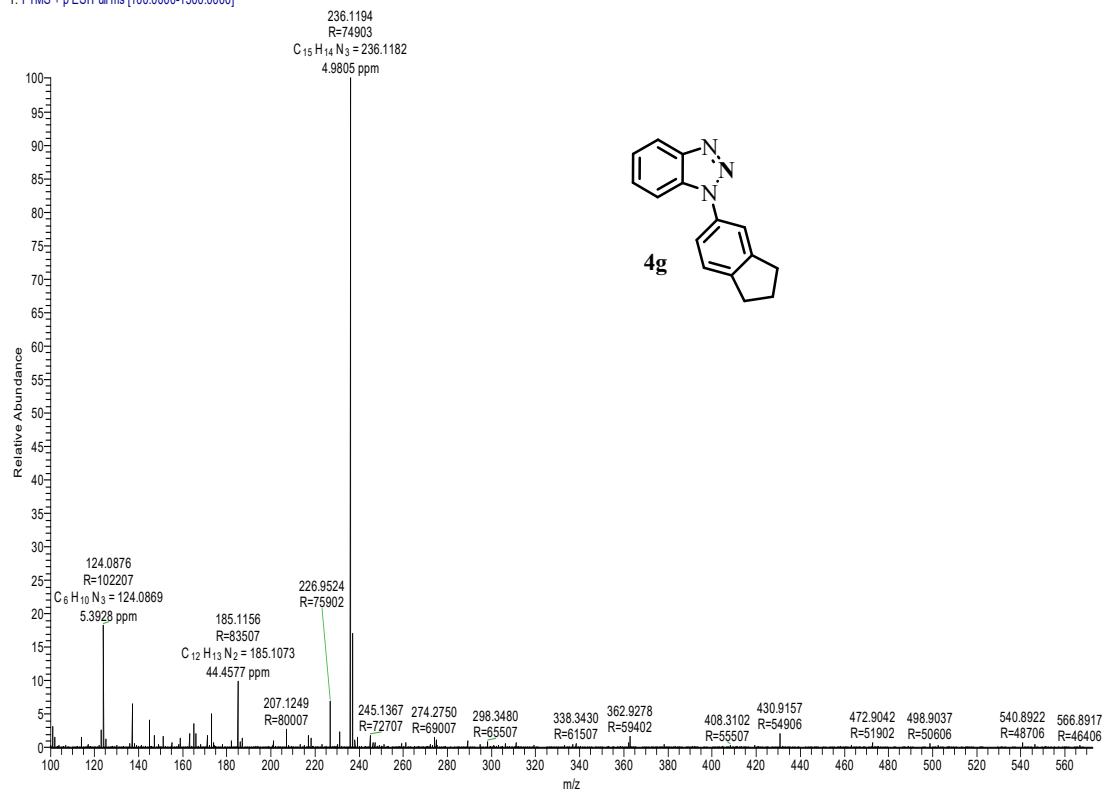

HRMS of Compound 4g

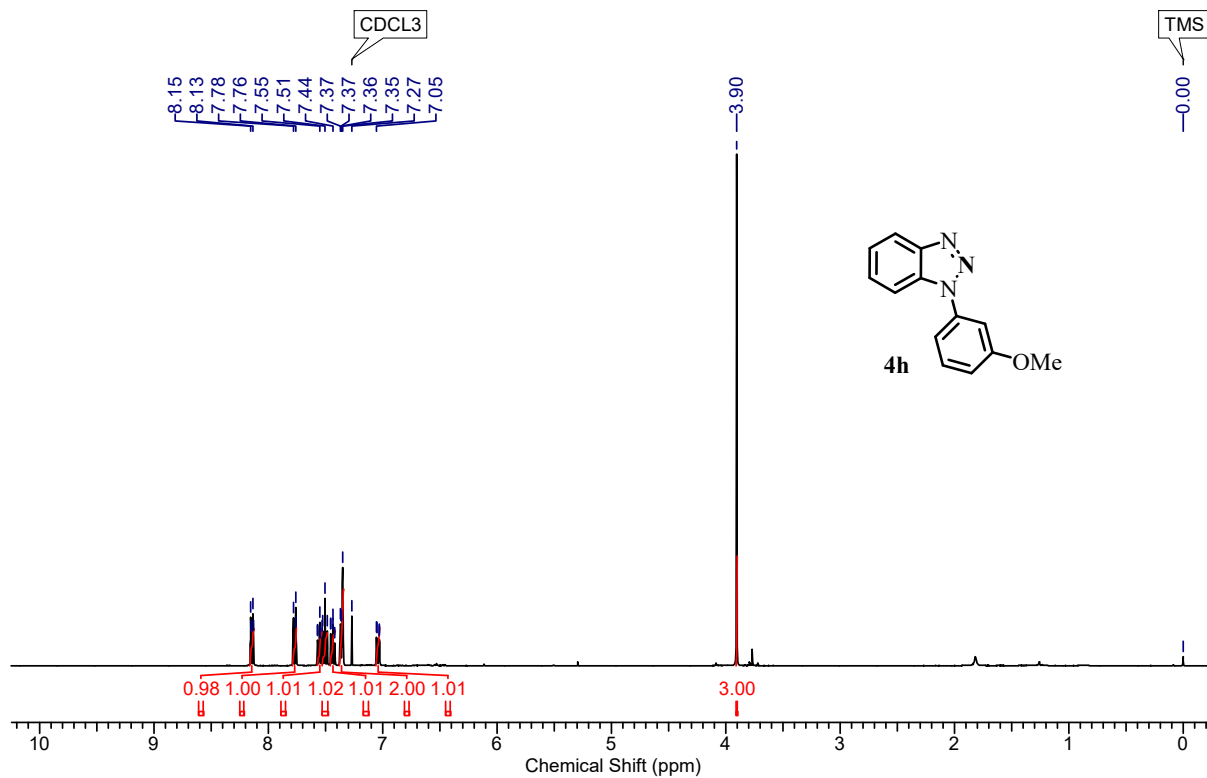

<sup>1</sup>H NMR (CDCl<sub>3</sub>, 400 MHz) of Compound 4h

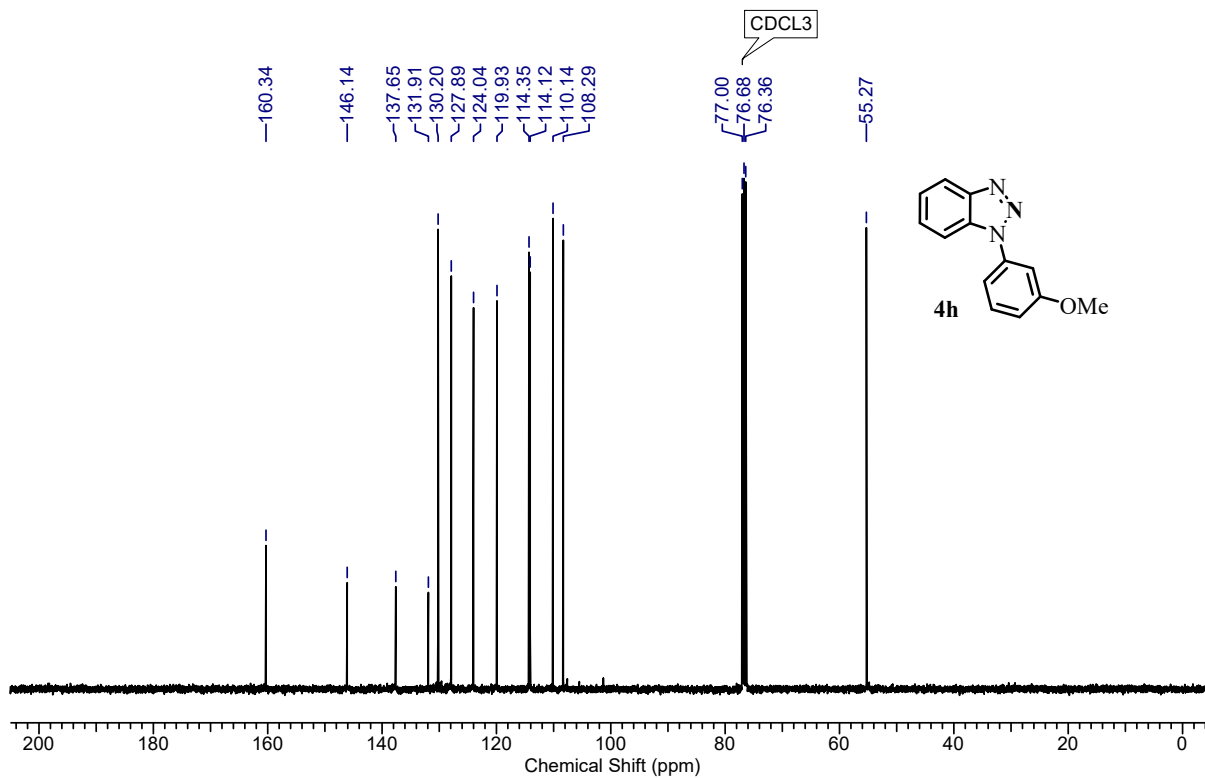

**<sup>13</sup>C NMR (CDCl<sub>3</sub>, 100 MHz) of Compound 4h**

BTA-25 #348 RT: 1.98 AV: 1 NL: 1.05E10  
T: FTMS + p ESI Full ms [100.0000-1500.0000]

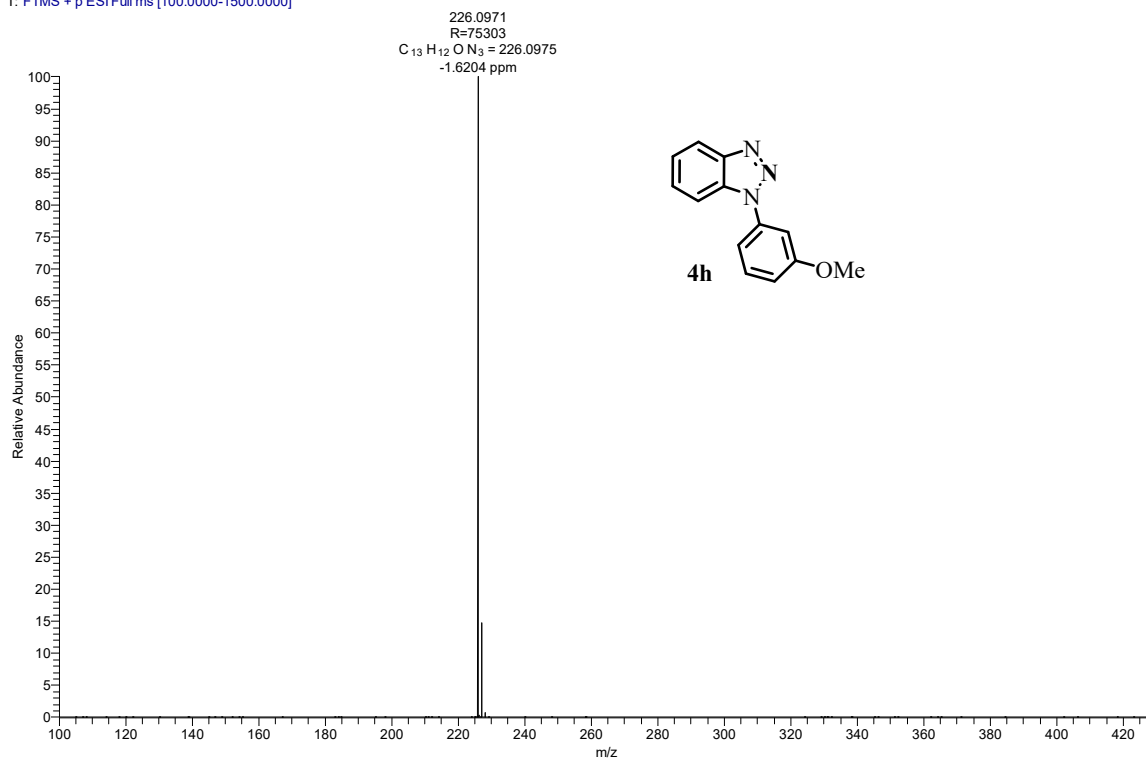

**HRMS of Compound 4h**

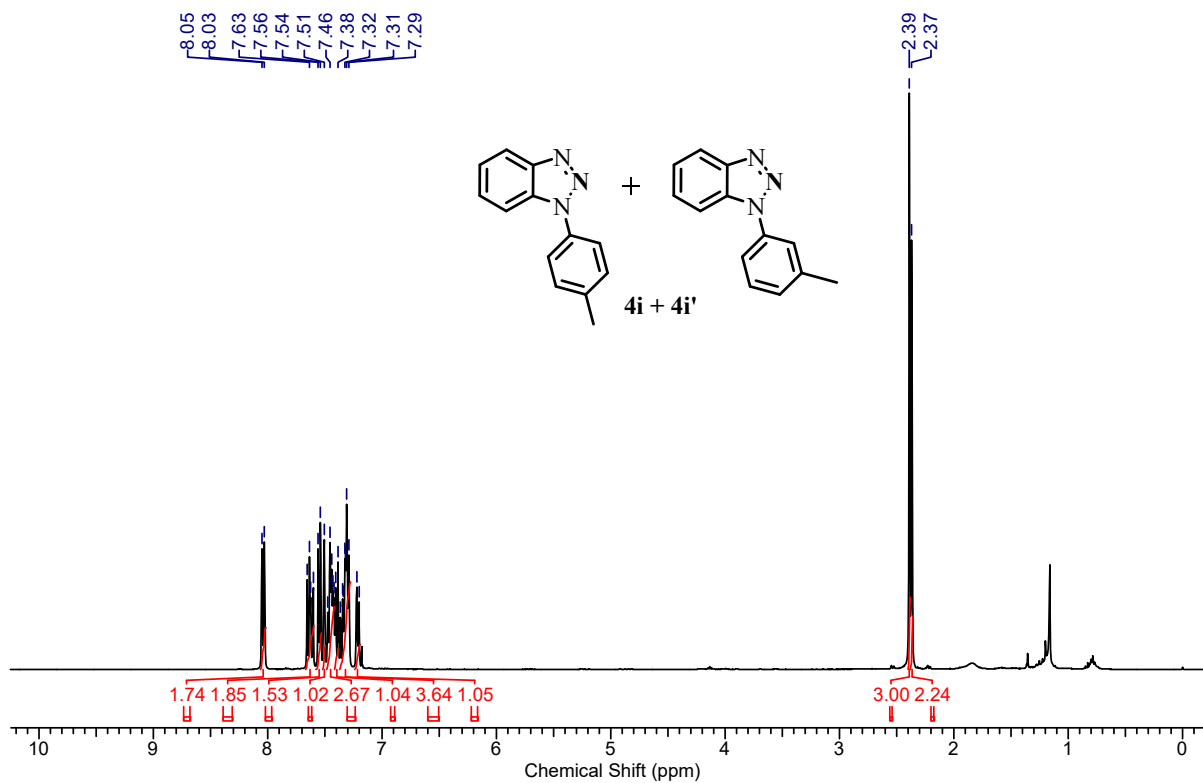

**<sup>1</sup>H NMR (CDCl<sub>3</sub>, 400 MHz) of Compound 4i + 4i'**

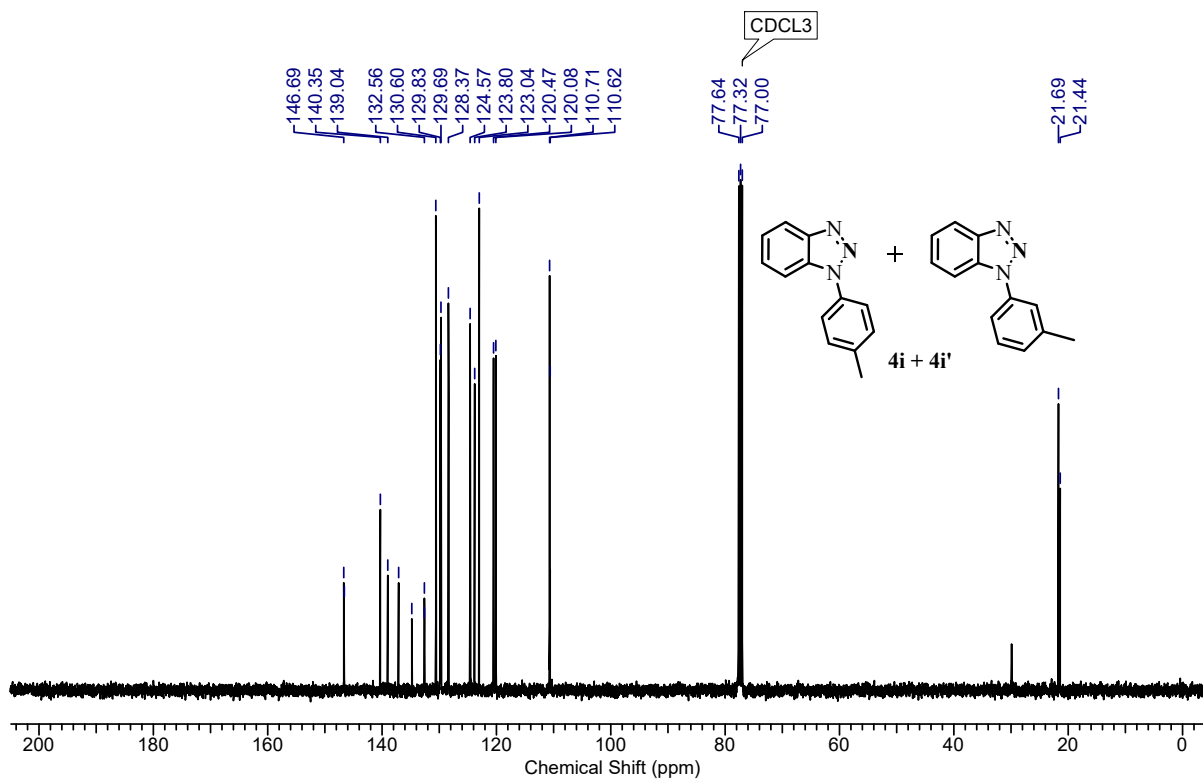

**<sup>13</sup>C NMR (CDCl<sub>3</sub>, 100 MHz) of Compound 4i + 4i'**

BAT-23 #379 RT: 2.04 AV: 1 NL: 3.99E9  
T: FTMS + p ESI Full ms [100.0000-1500.0000]

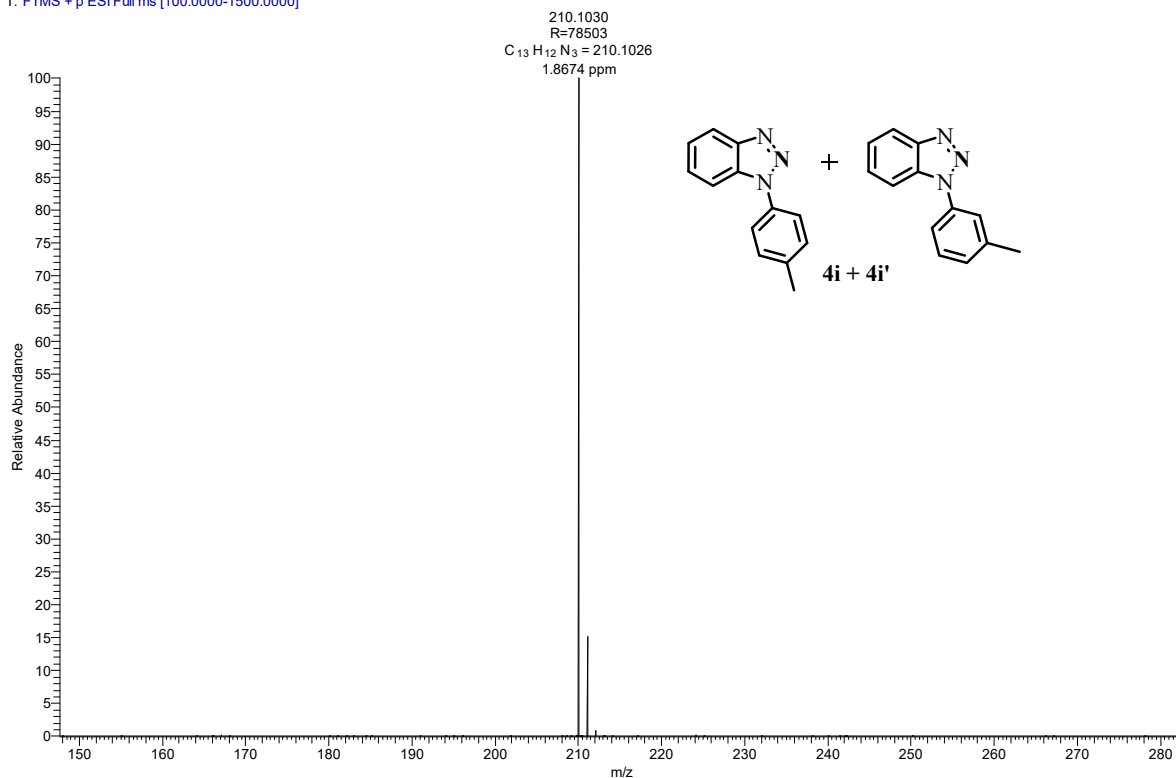

HRMS of Compound 4i + 4i'

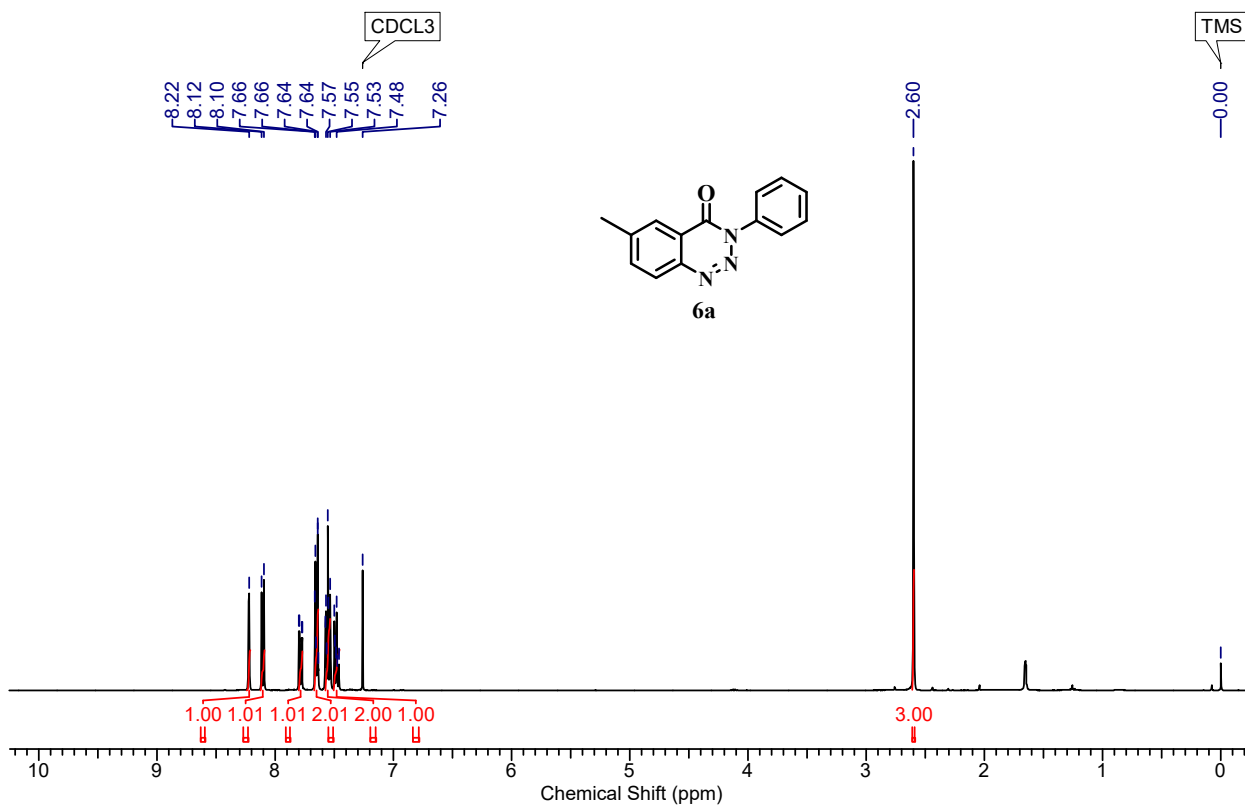

<sup>1</sup>H NMR (CDCl<sub>3</sub>, 400 MHz) of Compound 6a

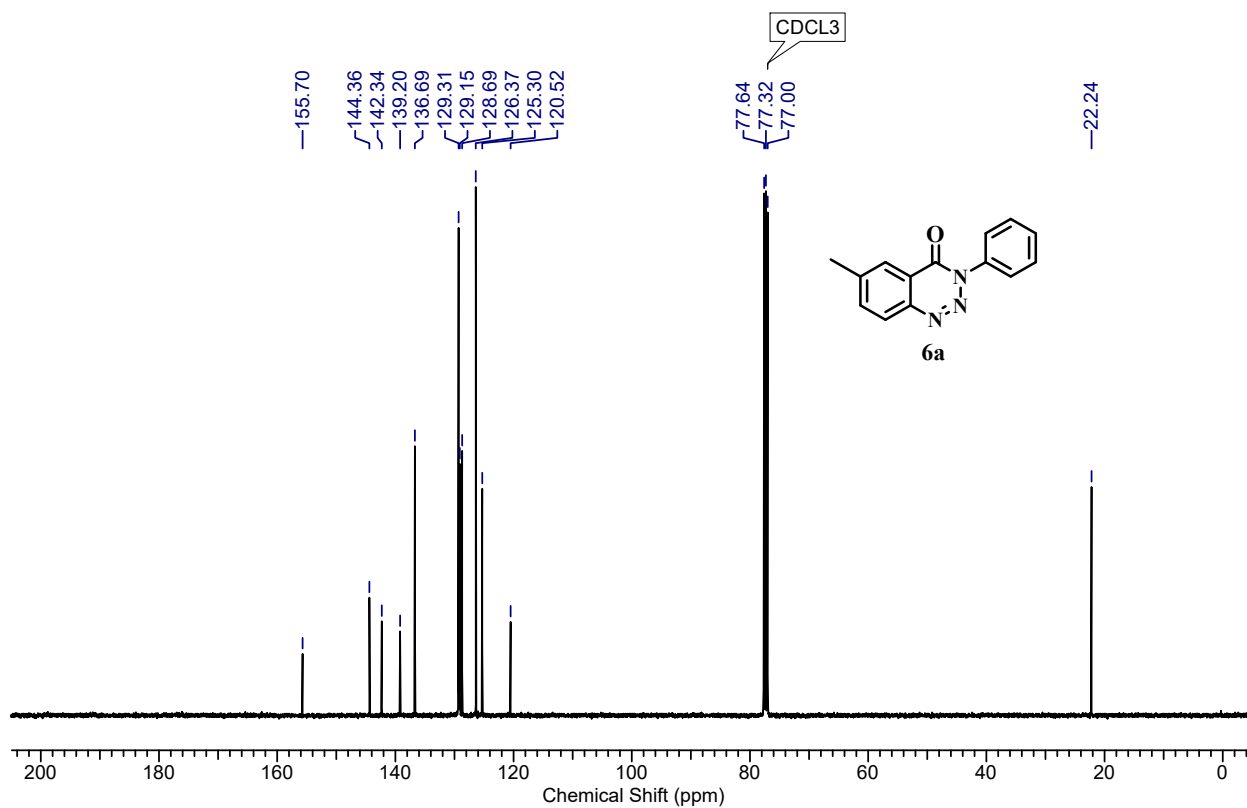

**$^{13}\text{C}$  NMR ( $\text{CDCl}_3$ , 100 MHz) of Compound **6a****

BAA-1 #303 RT: 1.84 AV: 1 NL: 6.34E8  
T: FTMS + p ESI Full ms [100.0000-1500.0000]

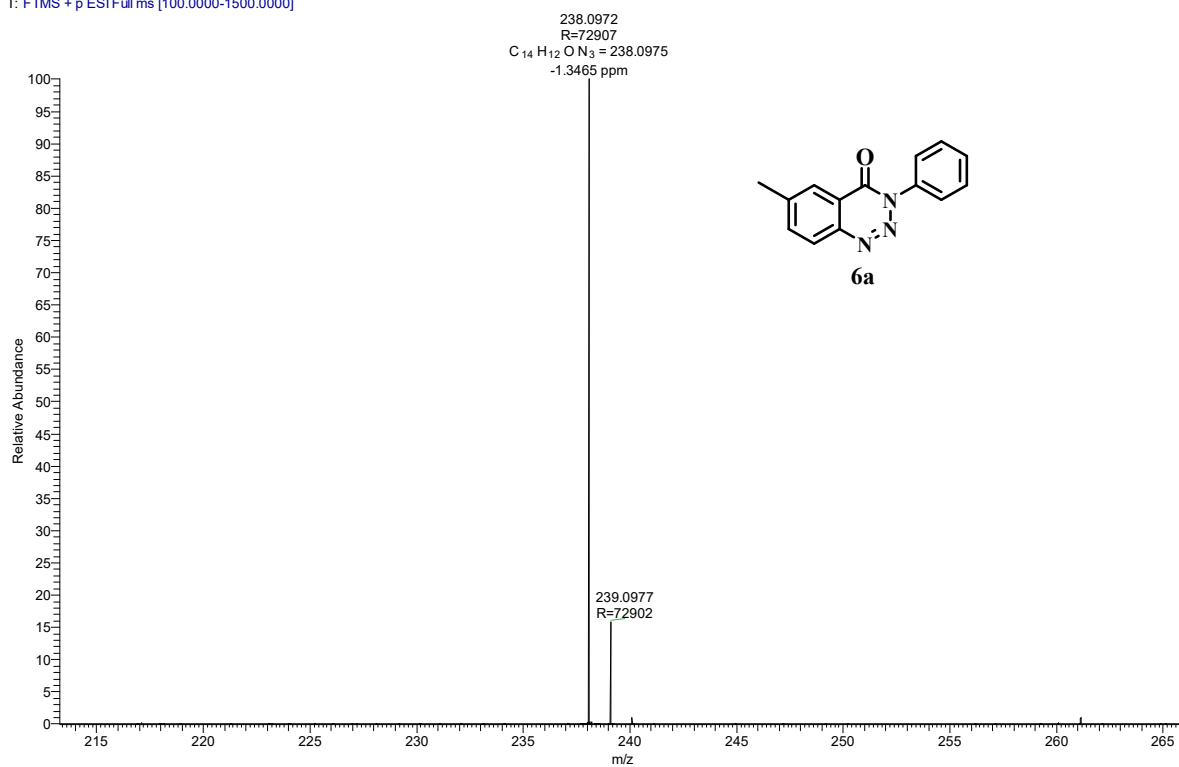

### HRMS of Compound 6a

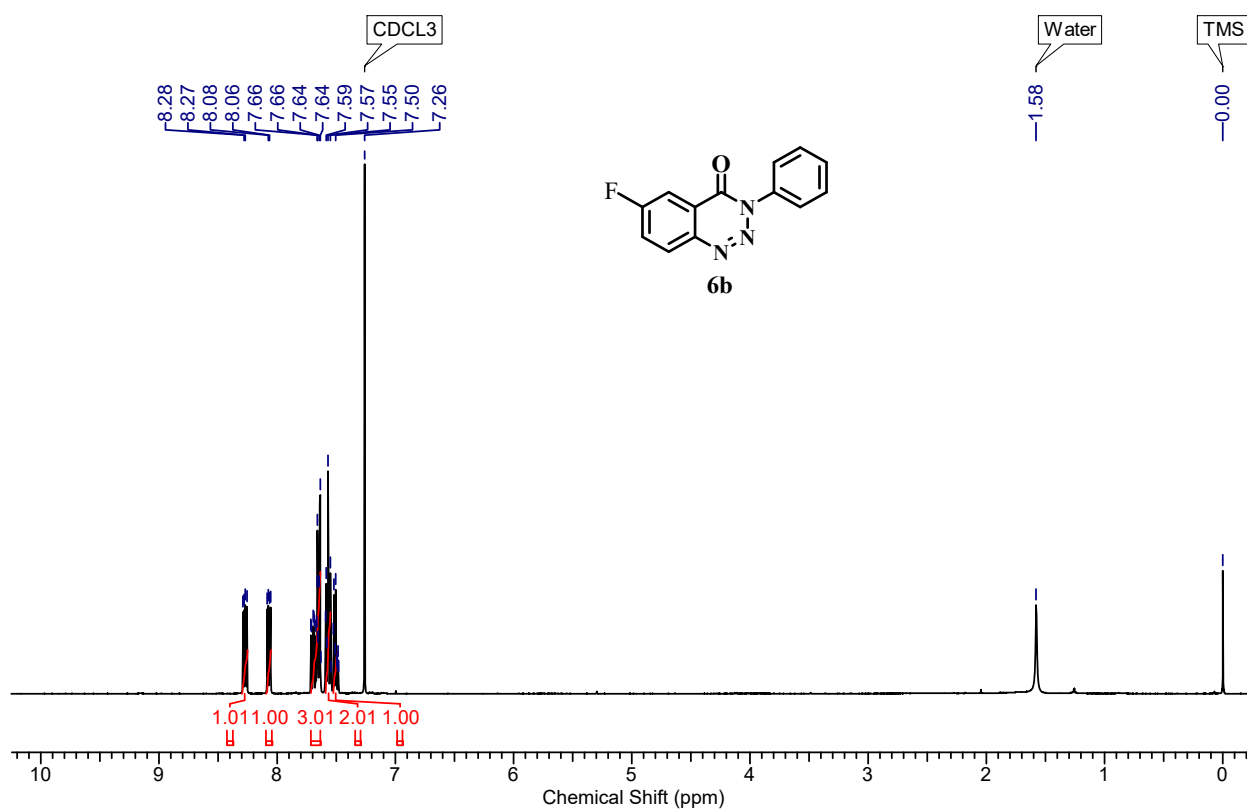

### <sup>1</sup>H NMR (CDCl<sub>3</sub>, 400 MHz) of Compound 6b

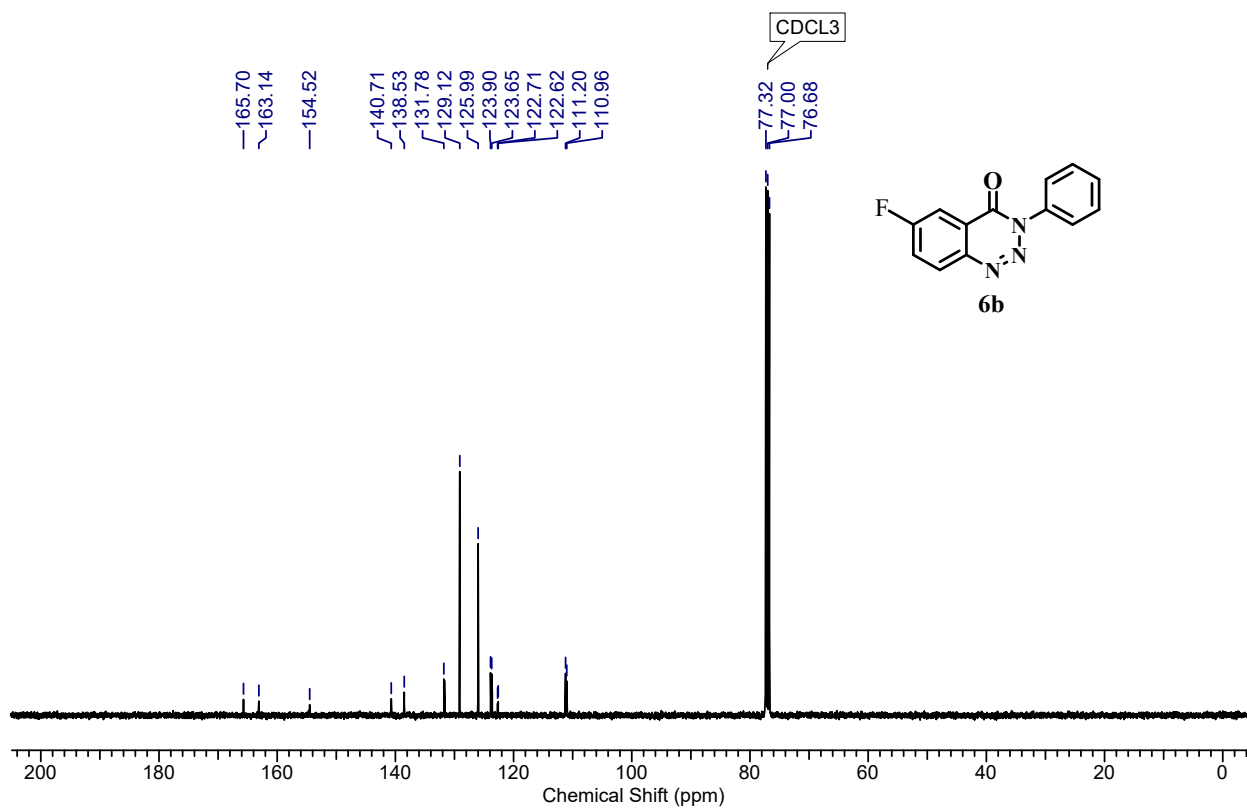

**<sup>13</sup>C NMR (CDCl<sub>3</sub>, 100 MHz) of Compound 6b**

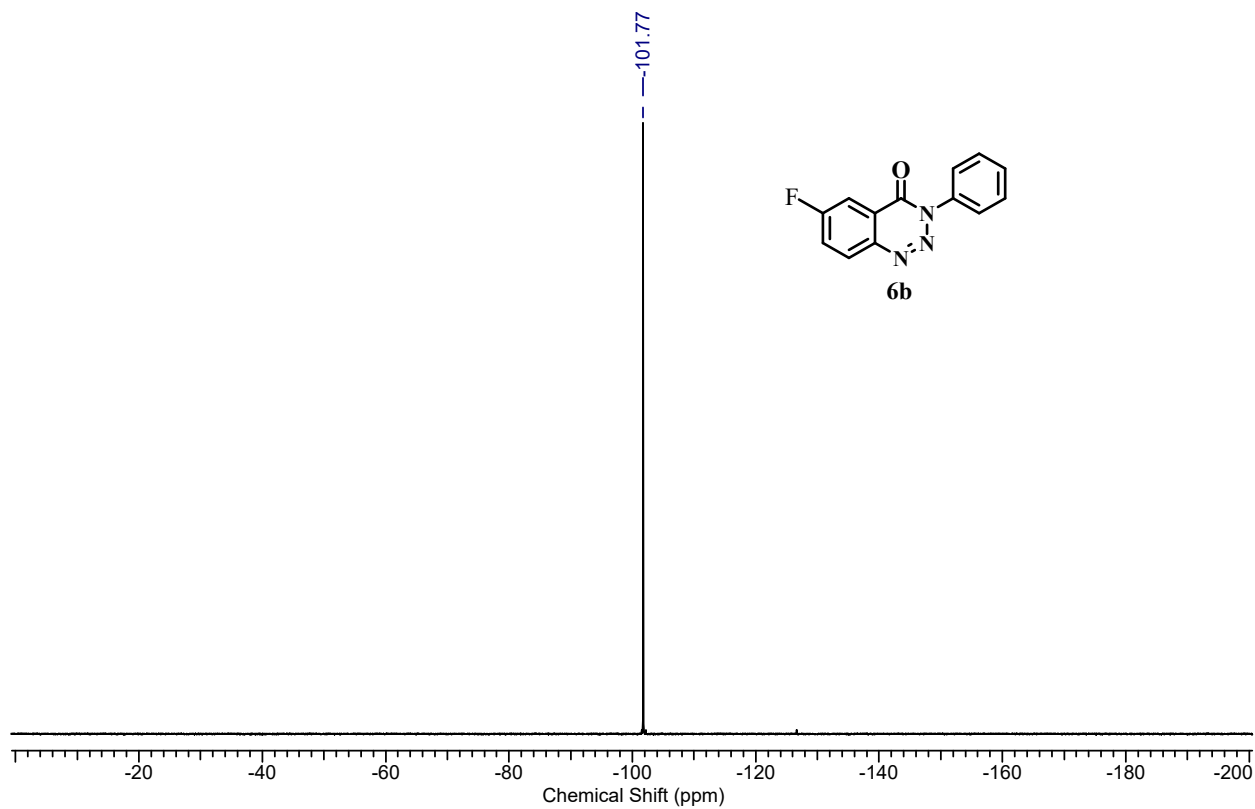

**<sup>19</sup>F NMR (CDCl<sub>3</sub>, 376 MHz) of Compound 6b**

BAA-2 #297 RT: 1.78 AV: 1 NL: 5.22E7  
T: FTMS + p ESI Full ms [100.0000-1500.0000]

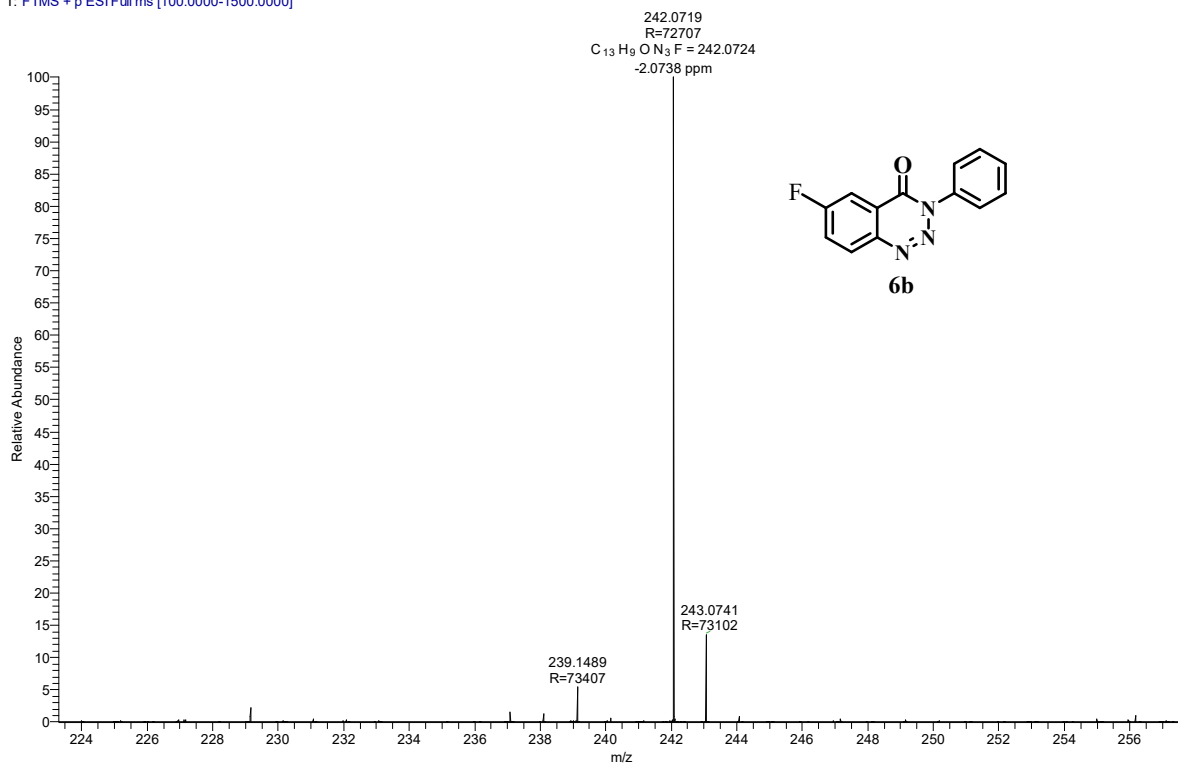

### HRMS of Compound 6b

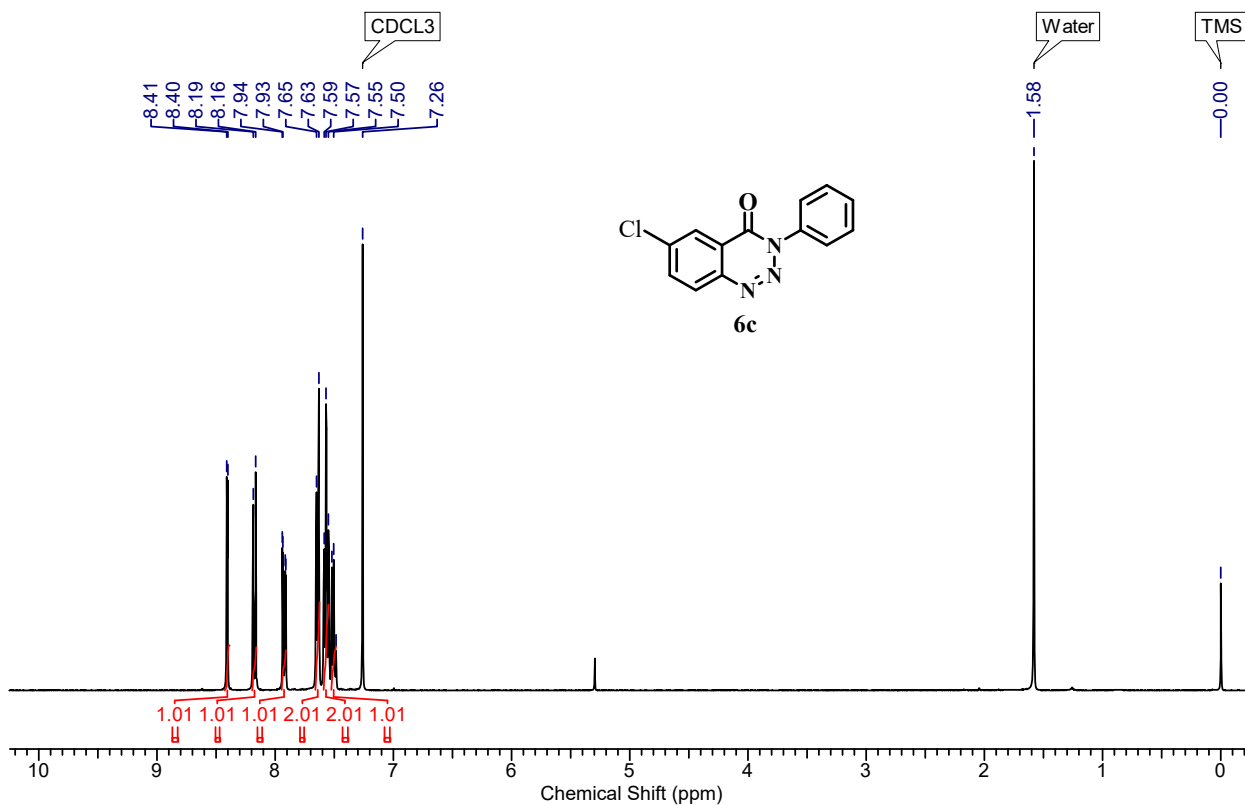

### <sup>1</sup>H NMR (CDCl<sub>3</sub>, 400 MHz) of Compound 6c

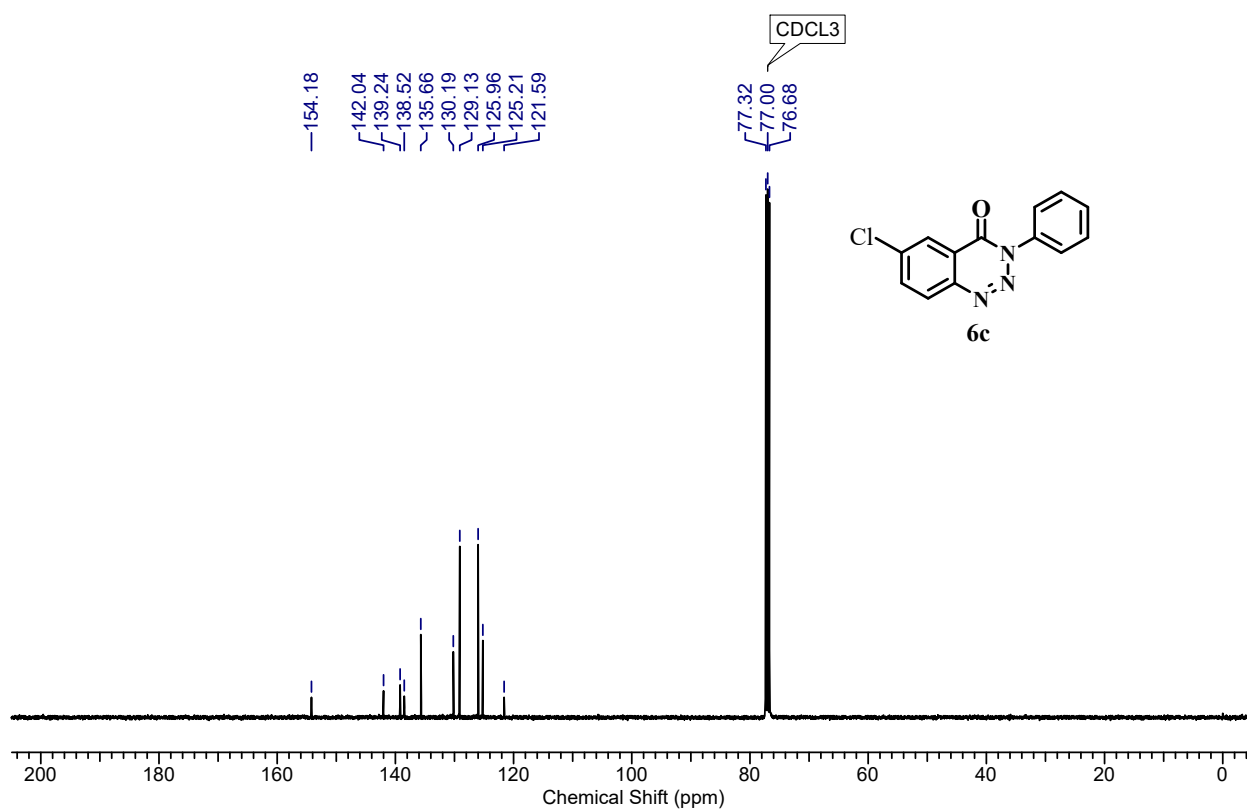

### <sup>13</sup>C NMR (CDCl<sub>3</sub>, 100 MHz) of Compound 6c

BAA-3 #315 RT: 1.88 AV: 1 NL: 7.49E7  
T: FTMS + p ESI Full ms [100.0000-1500.0000]

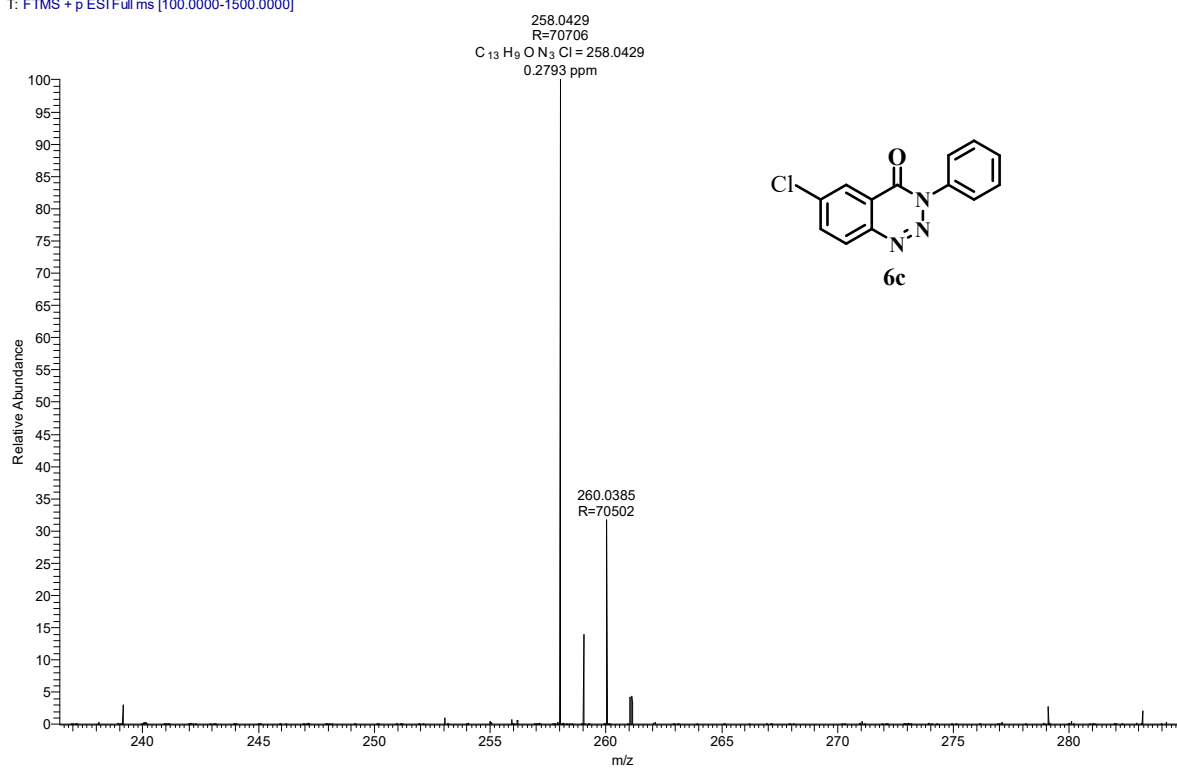

# HRMS of Compound 6c

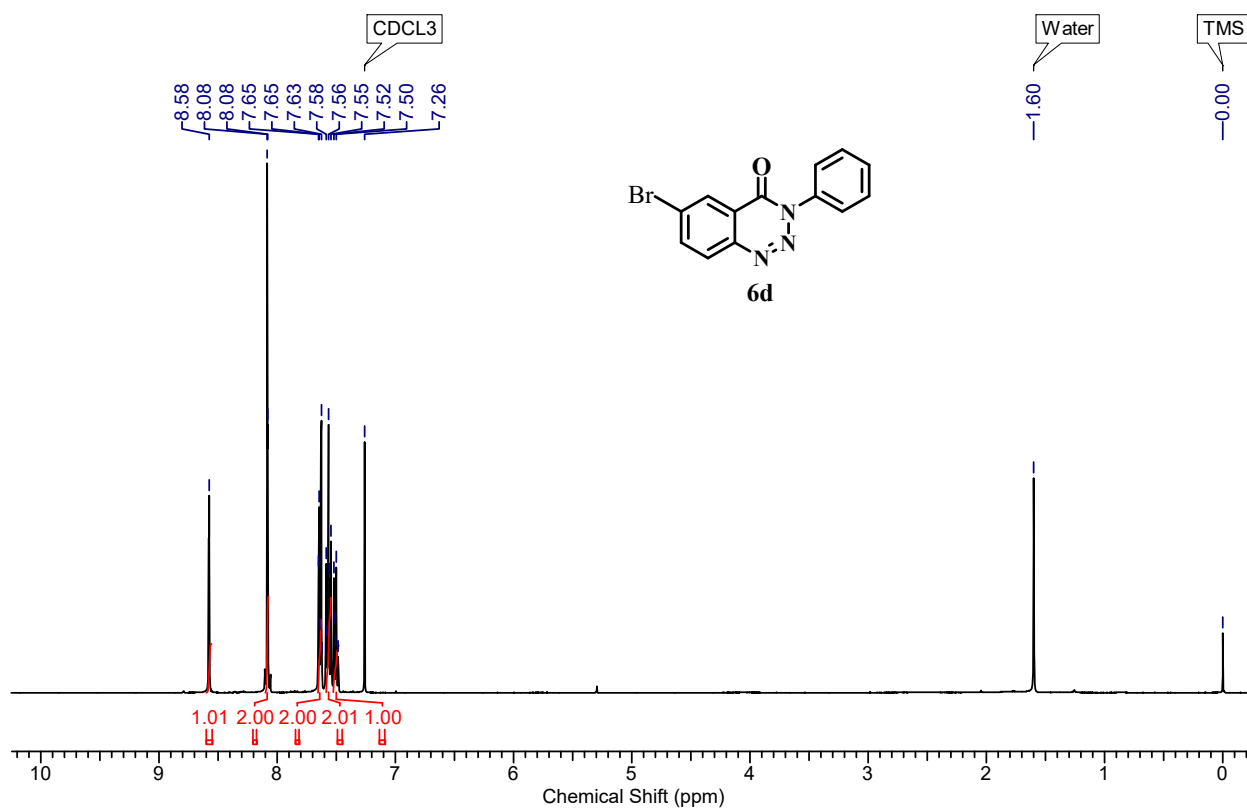

<sup>1</sup>H NMR (CDCl<sub>3</sub>, 400 MHz) of Compound 6d

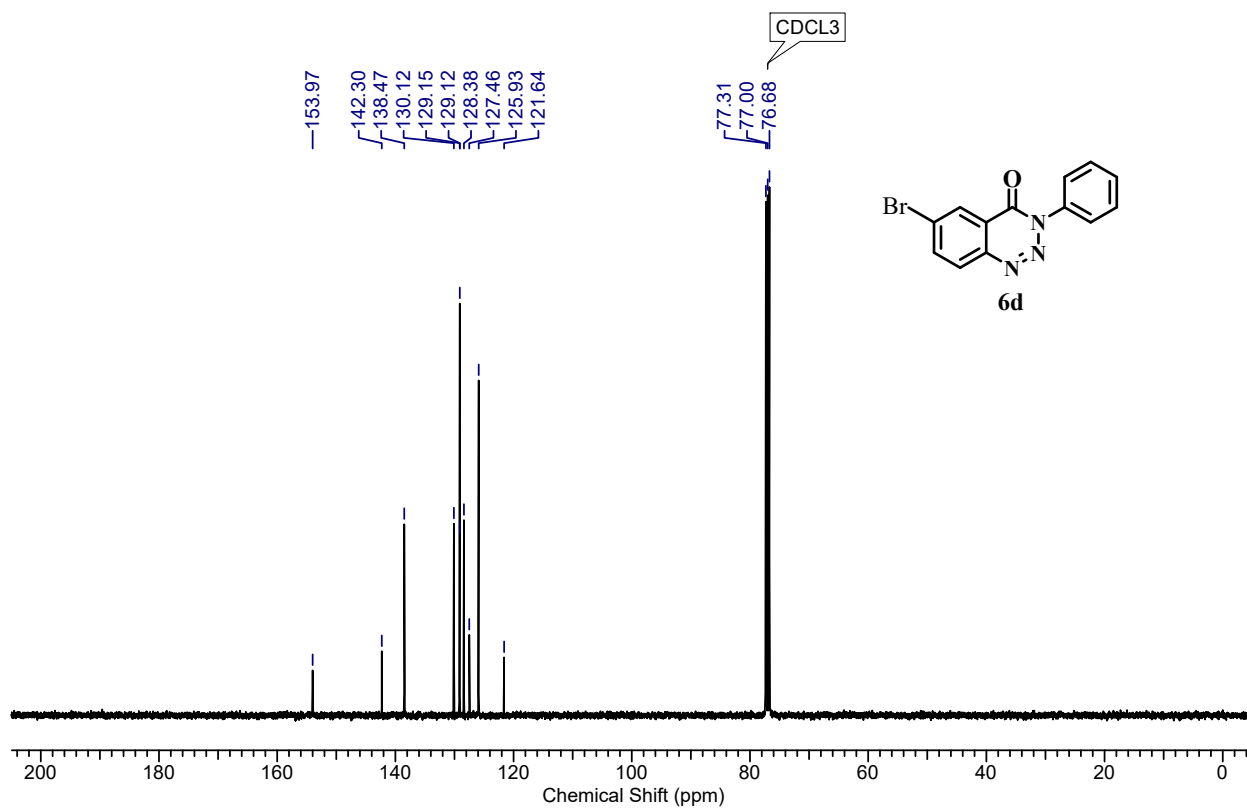

$^{13}\text{C}$  NMR ( $\text{CDCl}_3$ , 100 MHz) of Compound **6d**

BAA-4 #319 RT: 1.90 AV: 1 NL: 2.18E7  
T: FTMS + p ESI Full ms [100.0000-1500.0000]

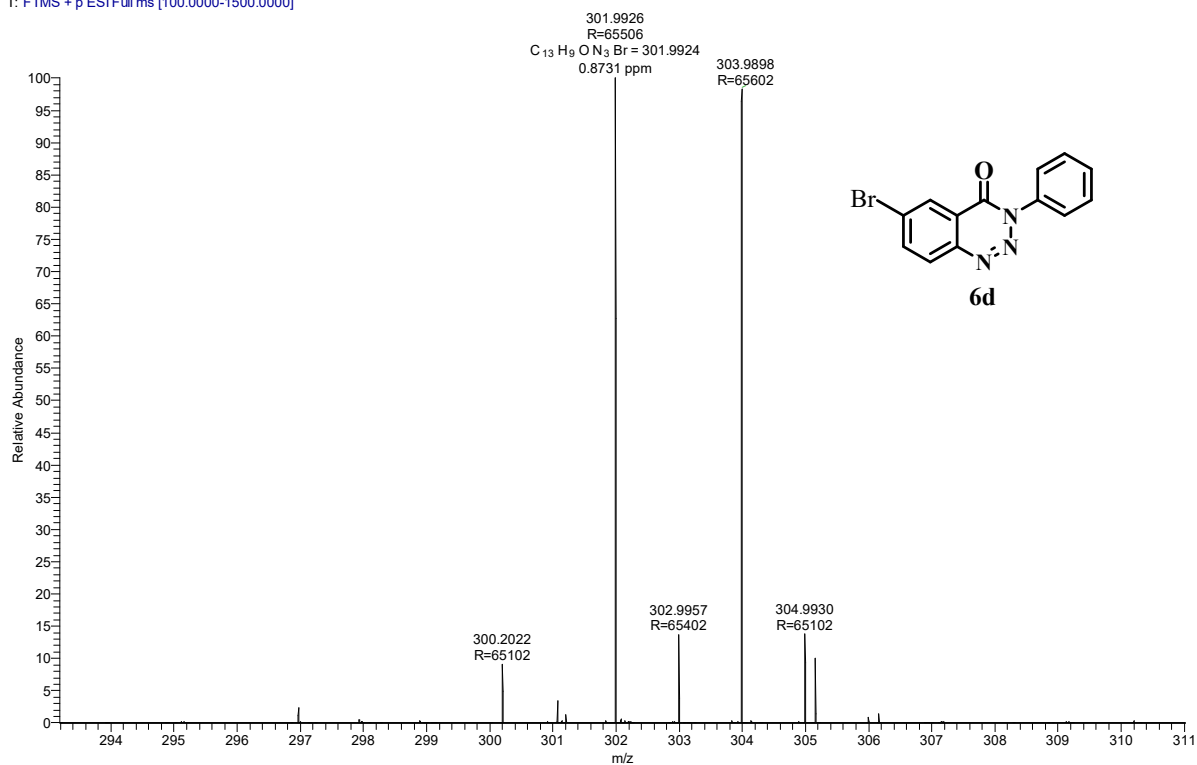

### HRMS of Compound 6d

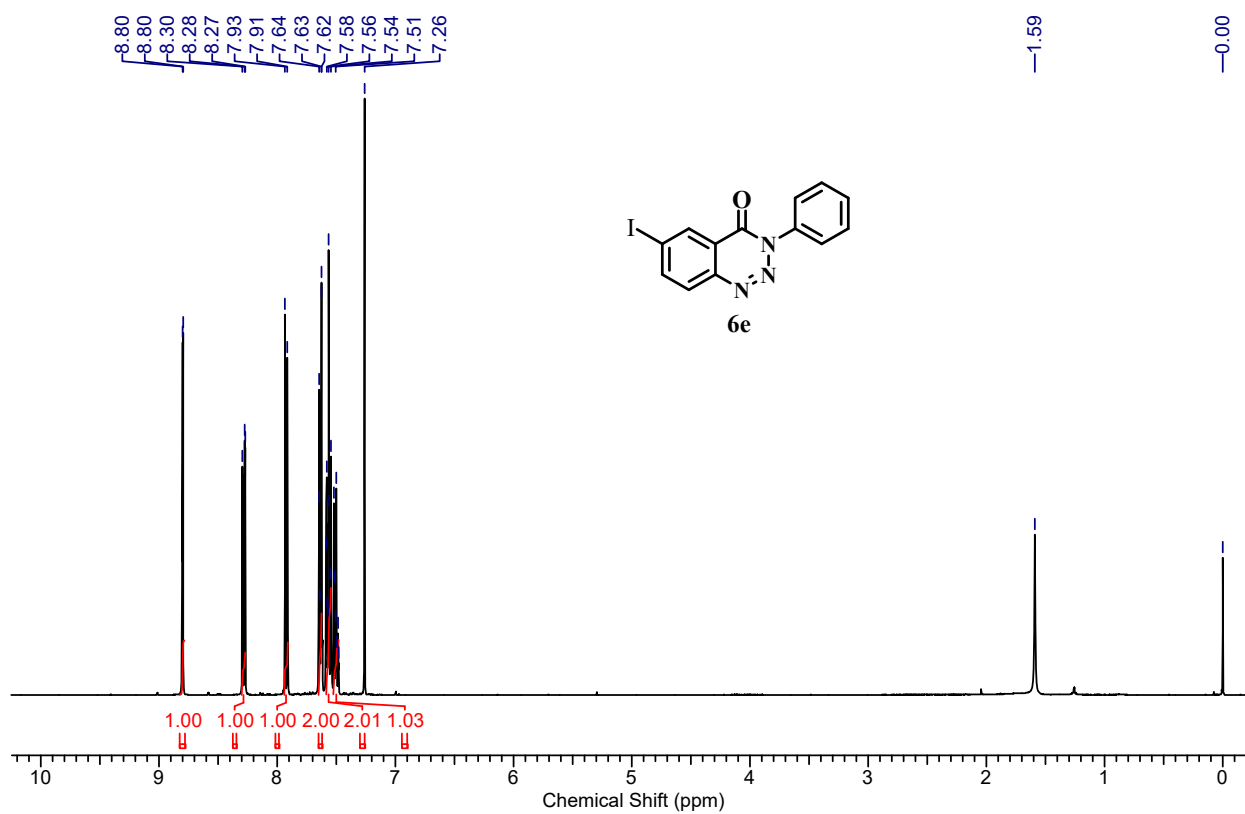

### <sup>1</sup>H NMR (CDCl<sub>3</sub>, 400 MHz) of Compound 6e

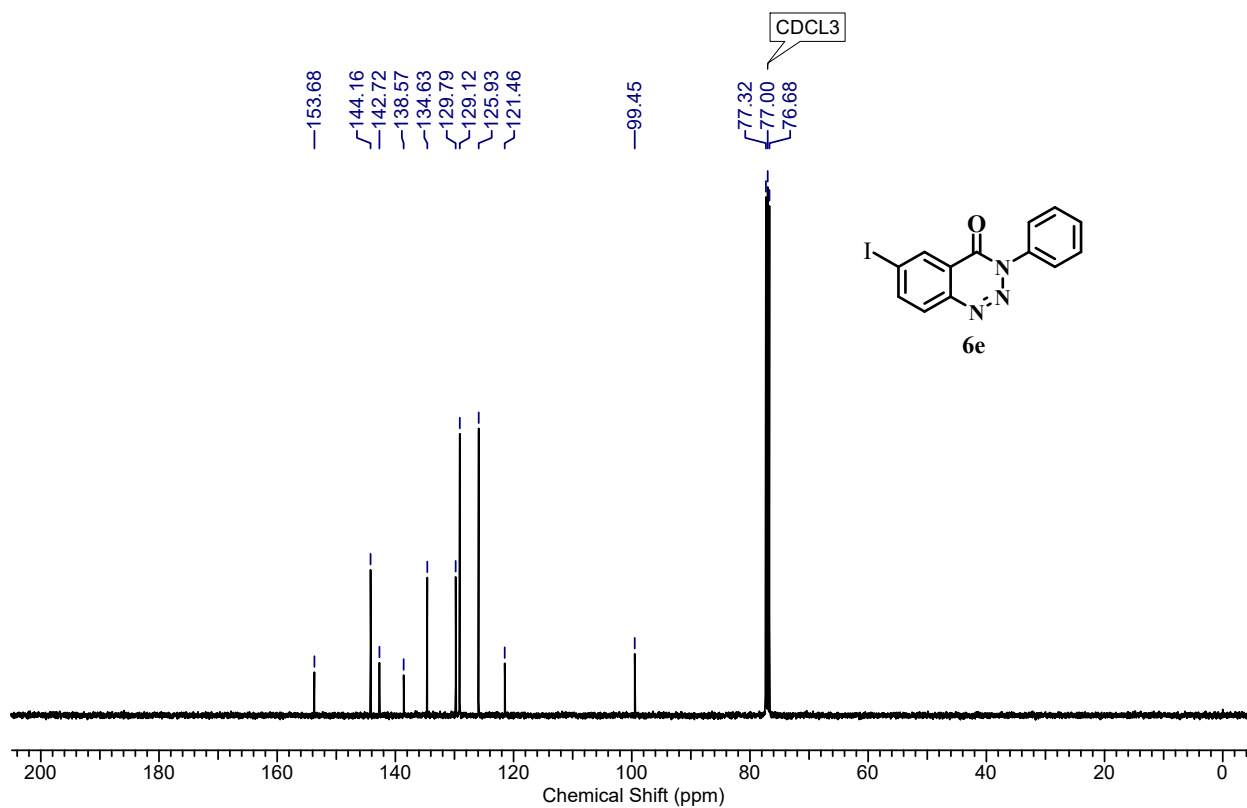

**<sup>13</sup>C NMR (CDCl<sub>3</sub>, 100 MHz) of Compound 6e**

BAA-5 #323 RT: 1.92 AV: 1 NL: 9.03E7  
T: FTMS + p ESI Full ms [100.0000-1500.0000]

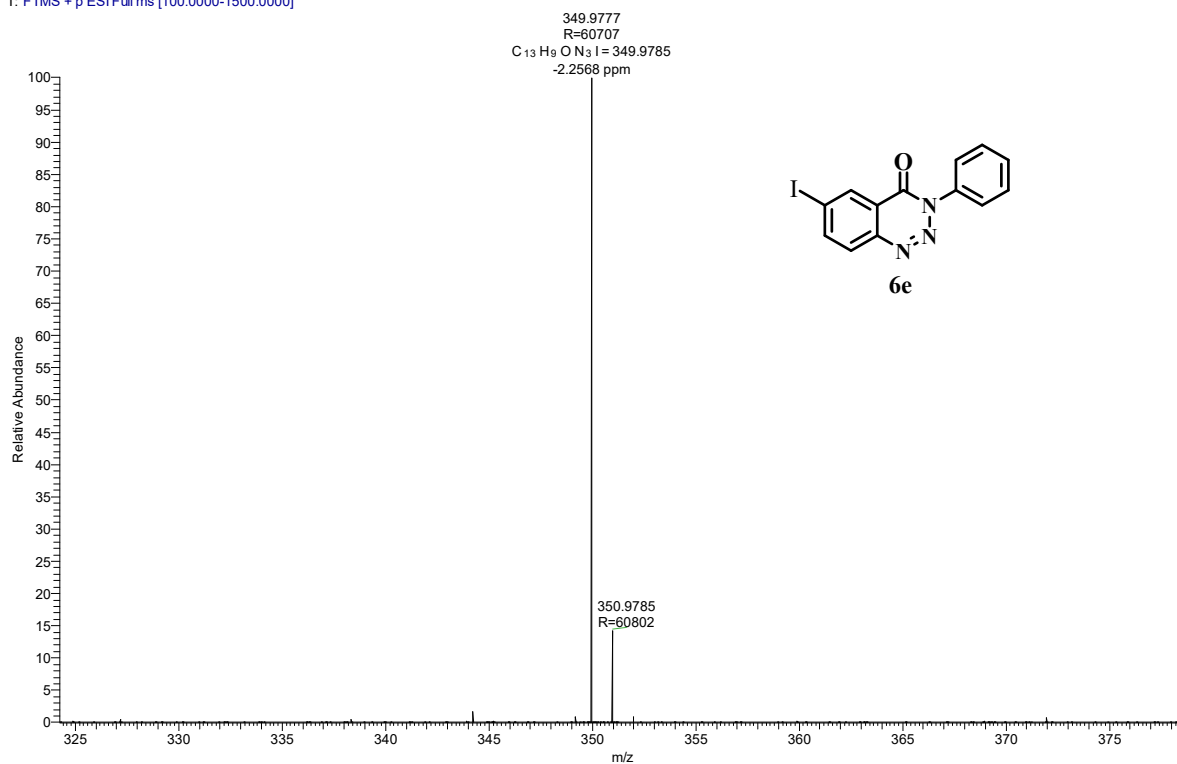

**HRMS of Compound 6e**

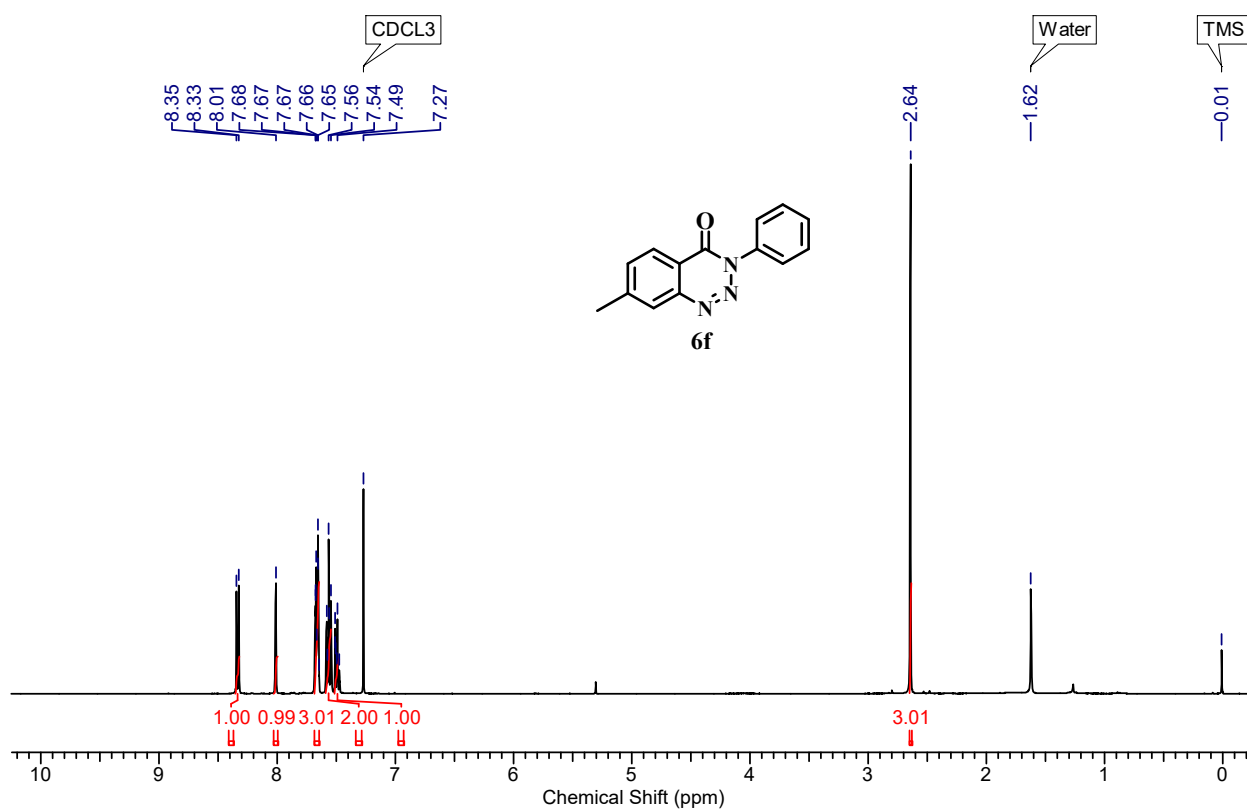

**<sup>1</sup>H NMR (CDCl<sub>3</sub>, 400 MHz) of Compound 6f**

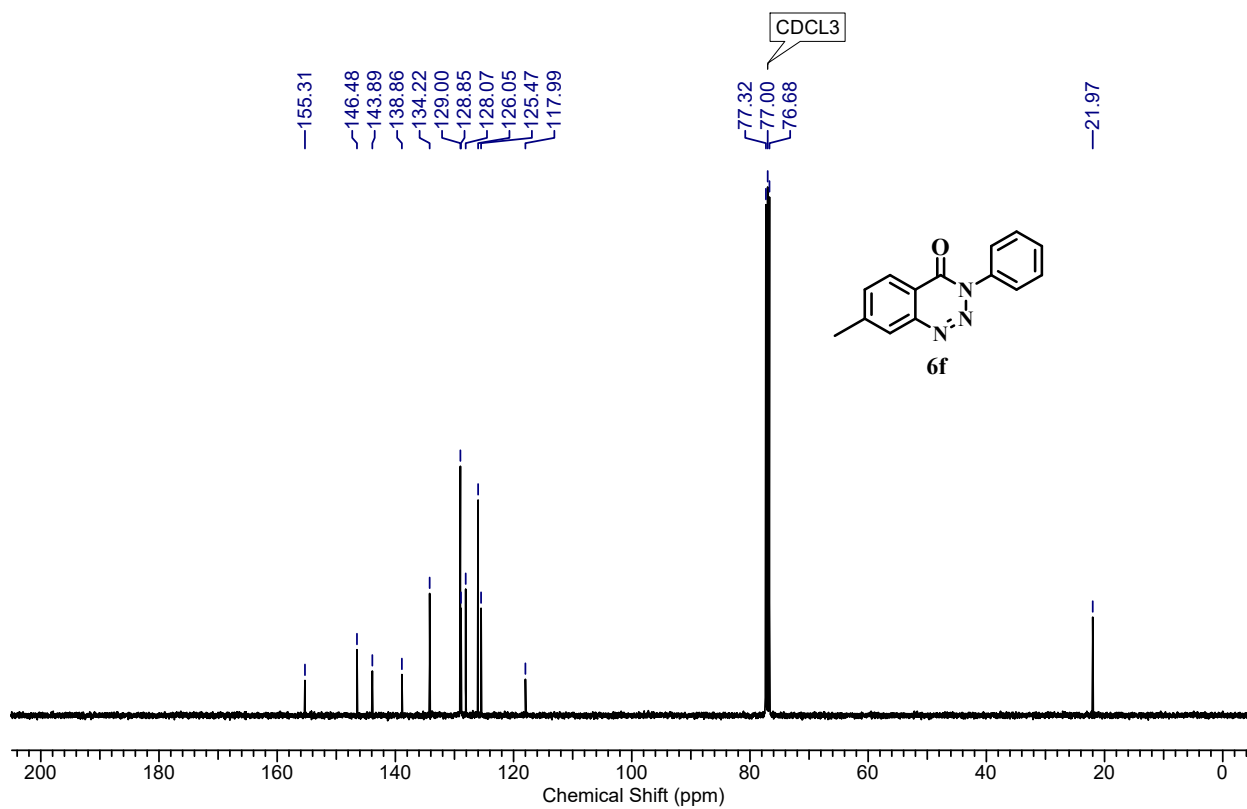

# $^{13}\text{C}$ NMR ( $\text{CDCl}_3$ , 100 MHz) of Compound 6f

BAA-6 #331 RT: 1.85 AV: 1 NL: 5.52E8  
T: FTMS + p ESI Full ms [100.0000-1500.0000]

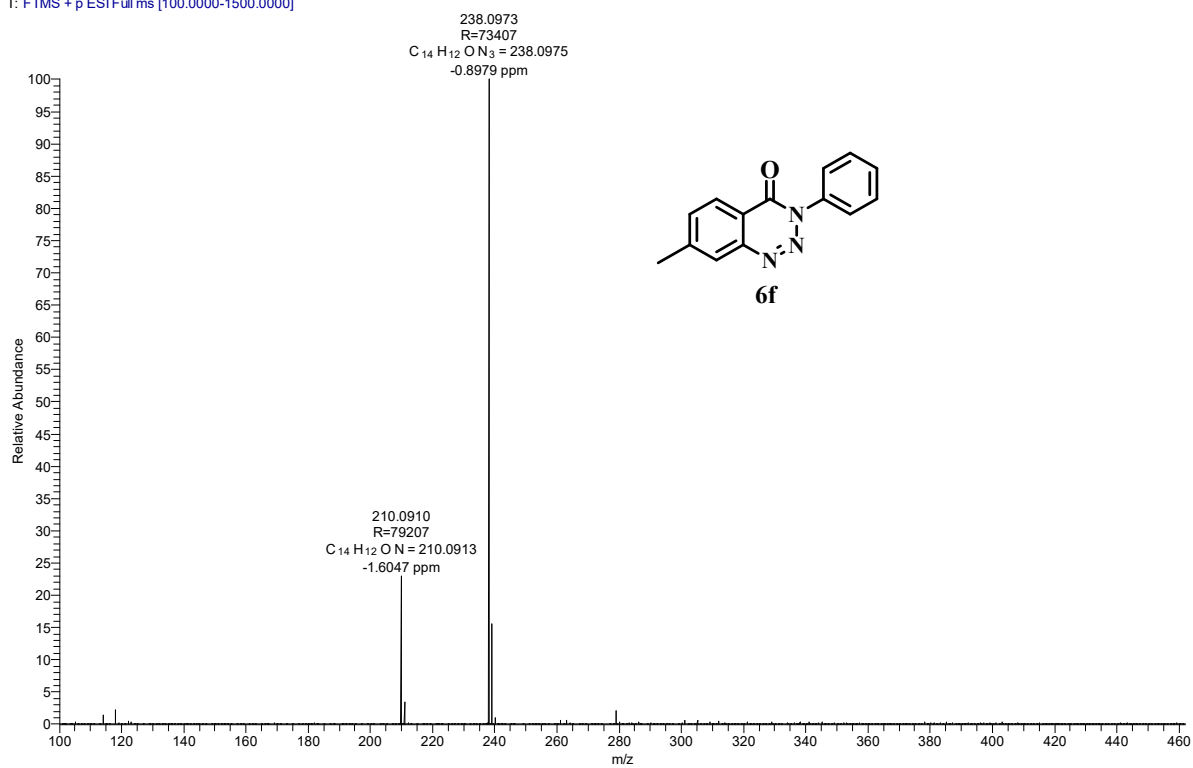

## HRMS of Compound 6f

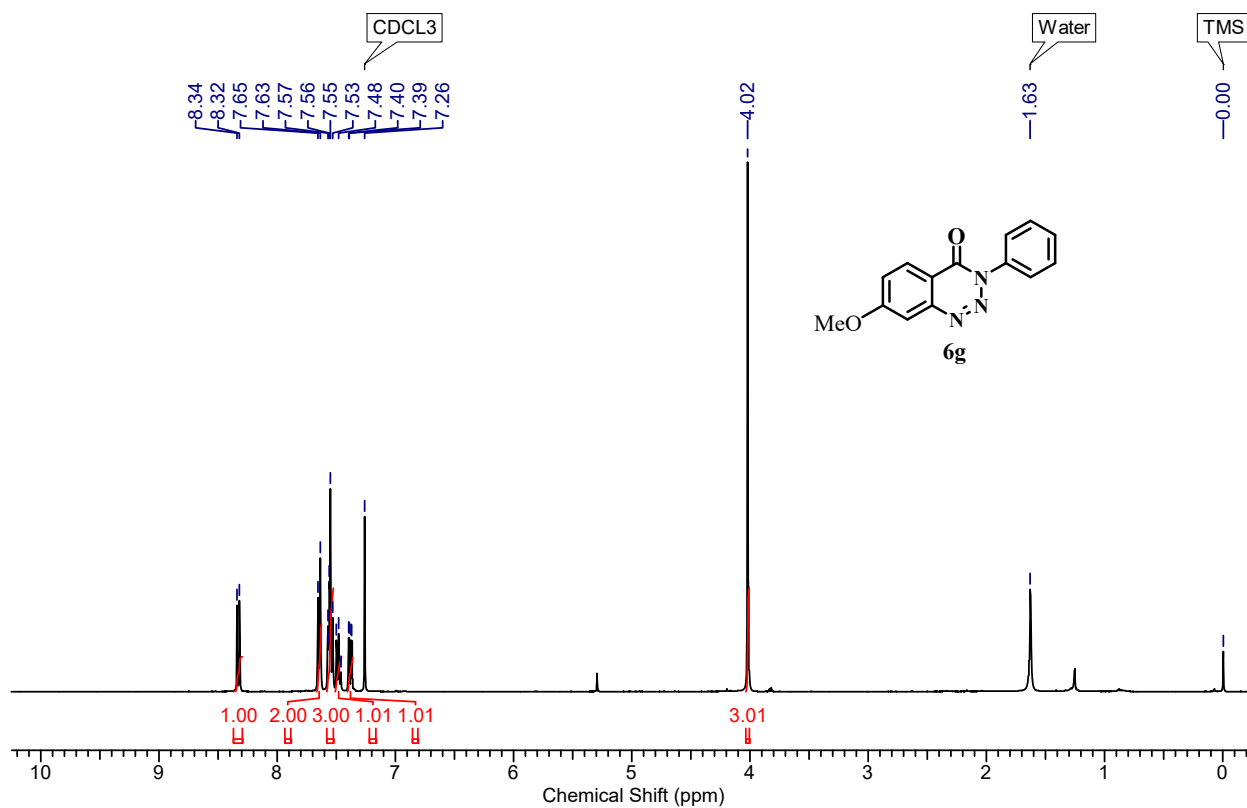

**<sup>1</sup>H NMR (CDCl<sub>3</sub>, 400 MHz) of Compound 6g**

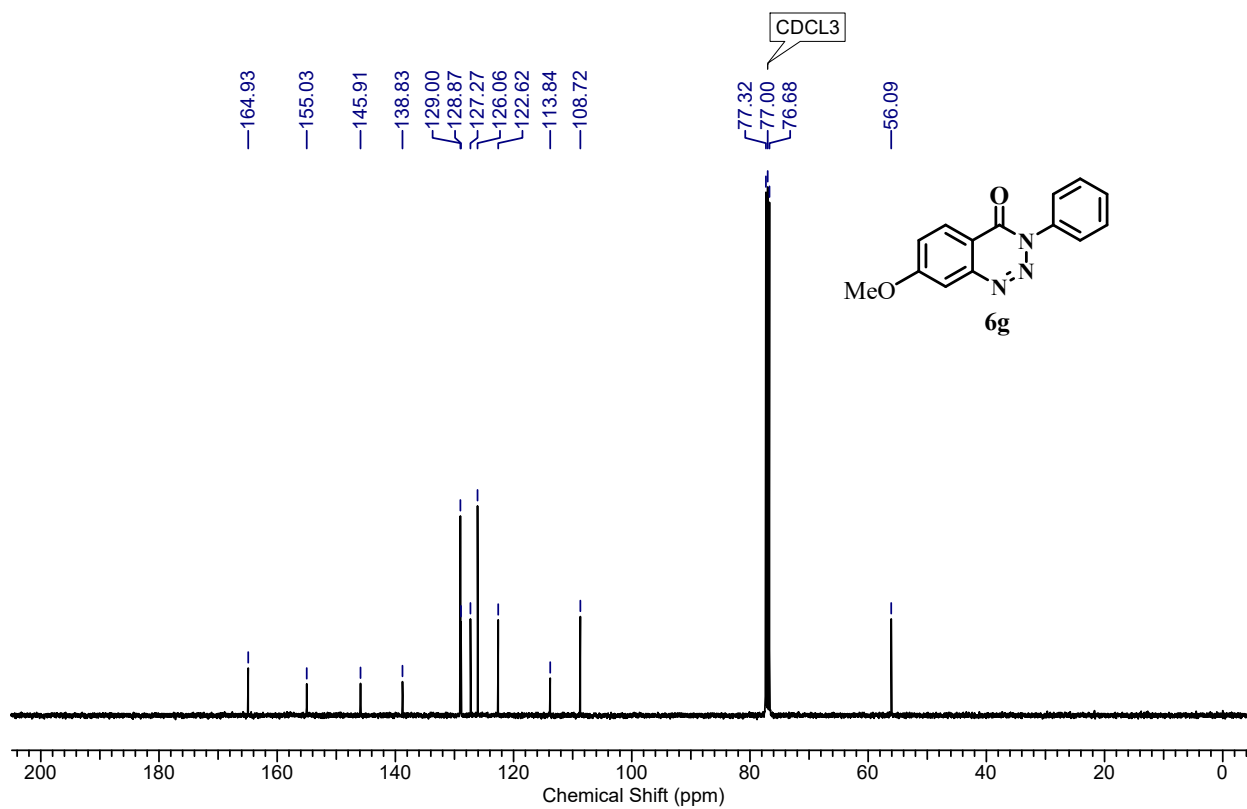

## $^{13}\text{C}$ NMR ( $\text{CDCl}_3$ , 100 MHz) of Compound 6g

BAA-7 #331 RT: 1.82 AV: 1 NL: 6.58E8  
T: FTMS + p ESI Full ms [100.0000-1500.0000]

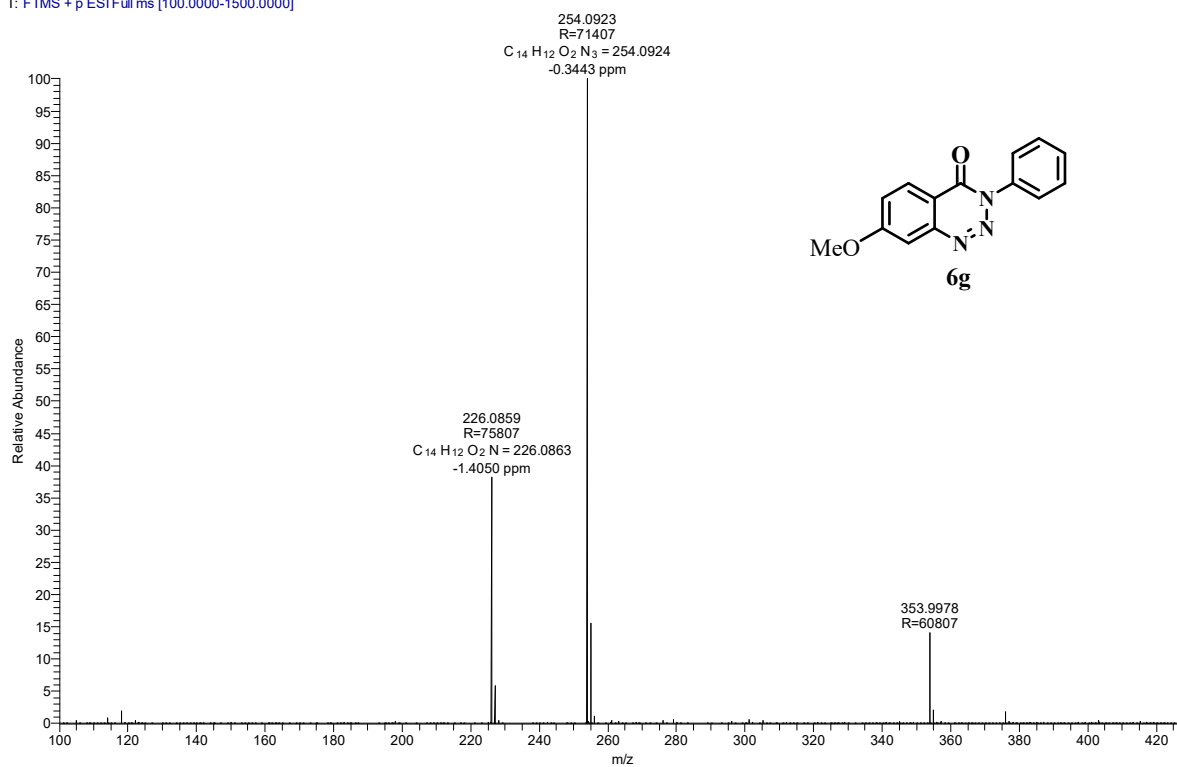

## HRMS of Compound 6g

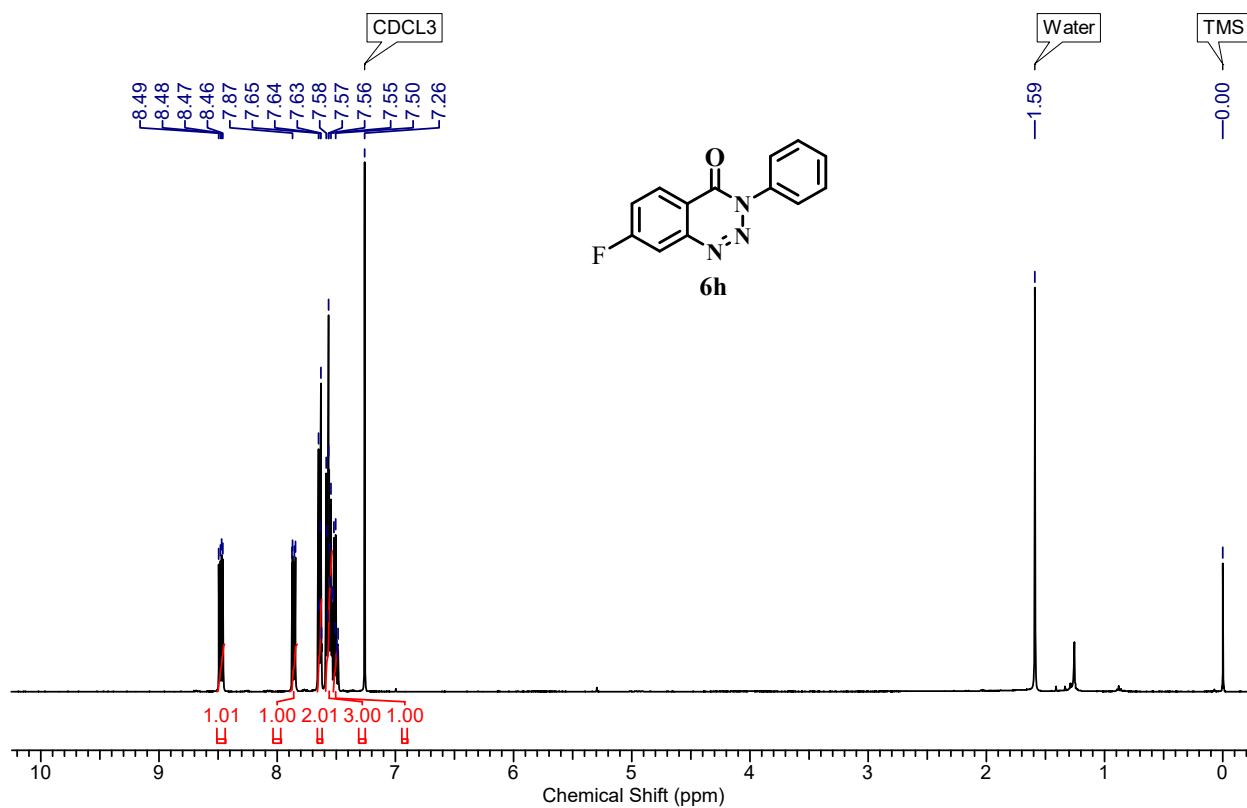

**<sup>1</sup>H NMR (CDCl<sub>3</sub>, 400 MHz) of Compound 6h**

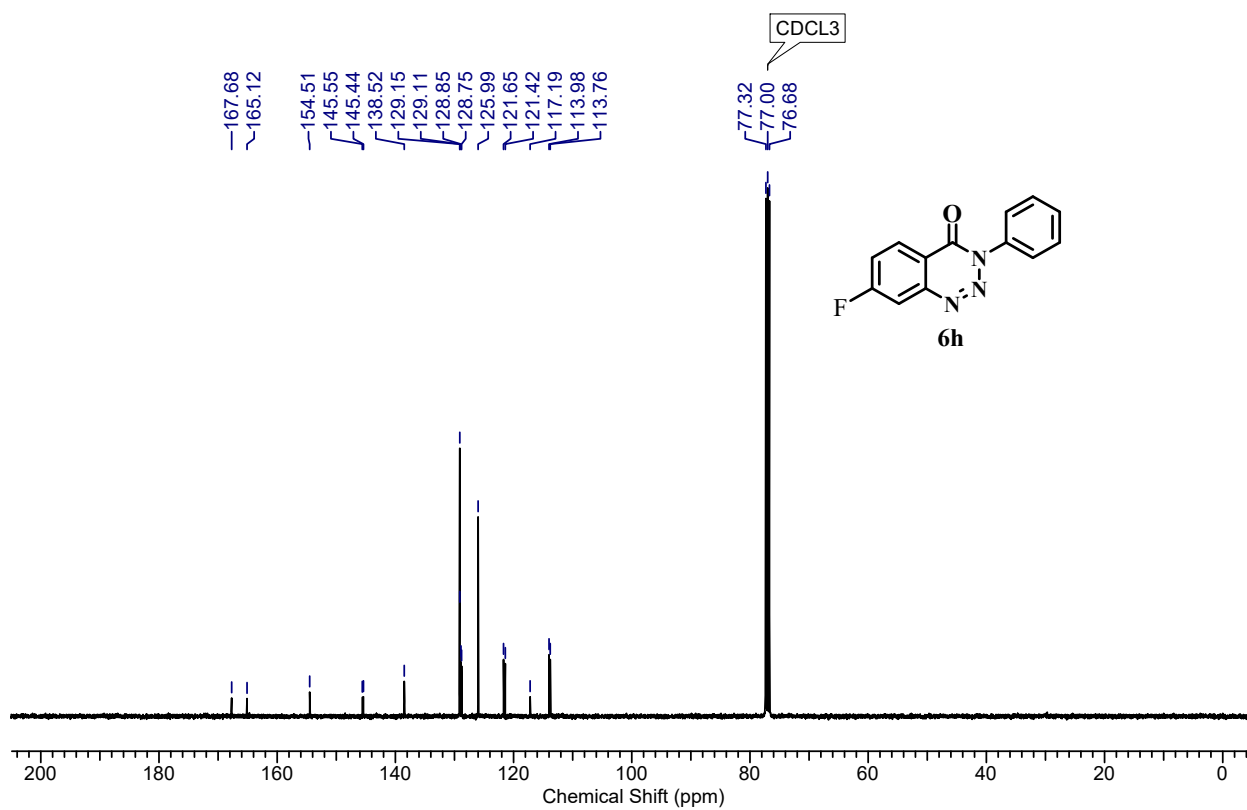

**<sup>13</sup>C NMR (CDCl<sub>3</sub>, 100 MHz) of Compound 6h**

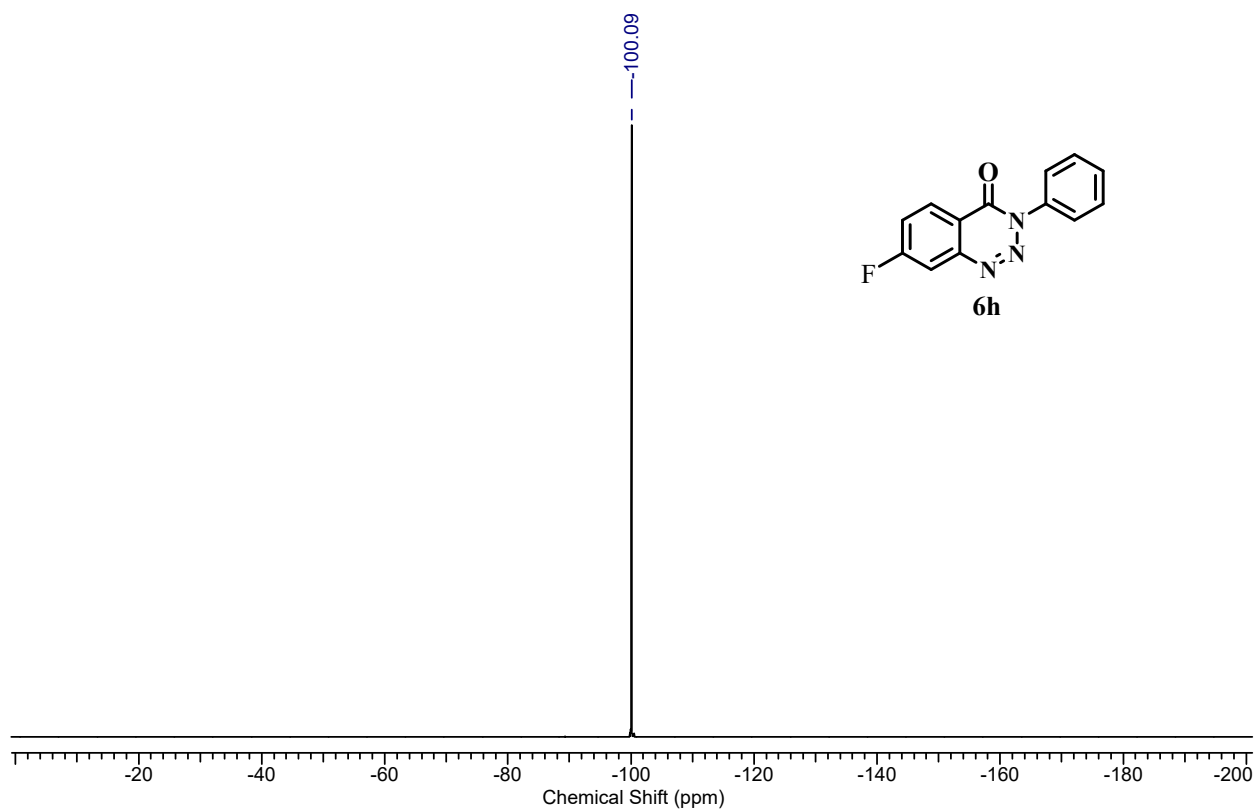

### <sup>19</sup>F NMR (CDCl<sub>3</sub>, 376 MHz) of Compound 6h

BAA-8 #452 RT: 2.43 AV: 1 NL: 1.21E9  
T: FTMS + p ESI Full ms [100.0000-1500.0000]

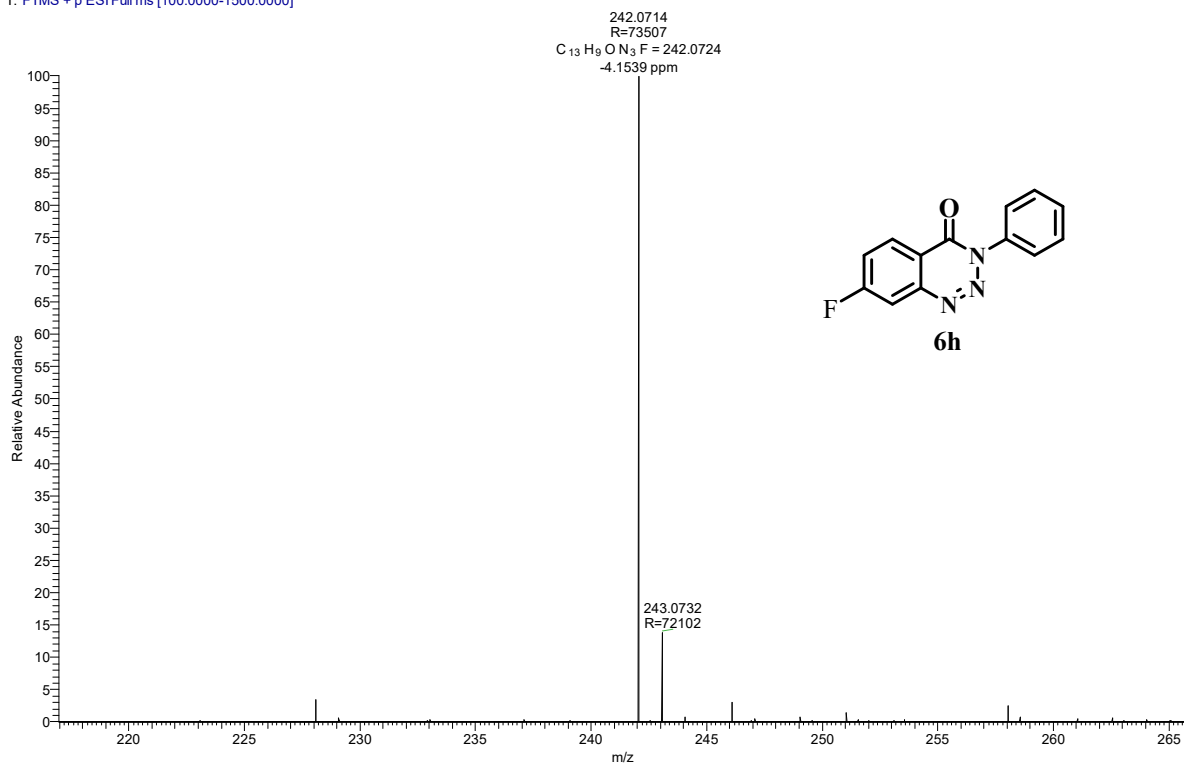

# HRMS of Compound 6h

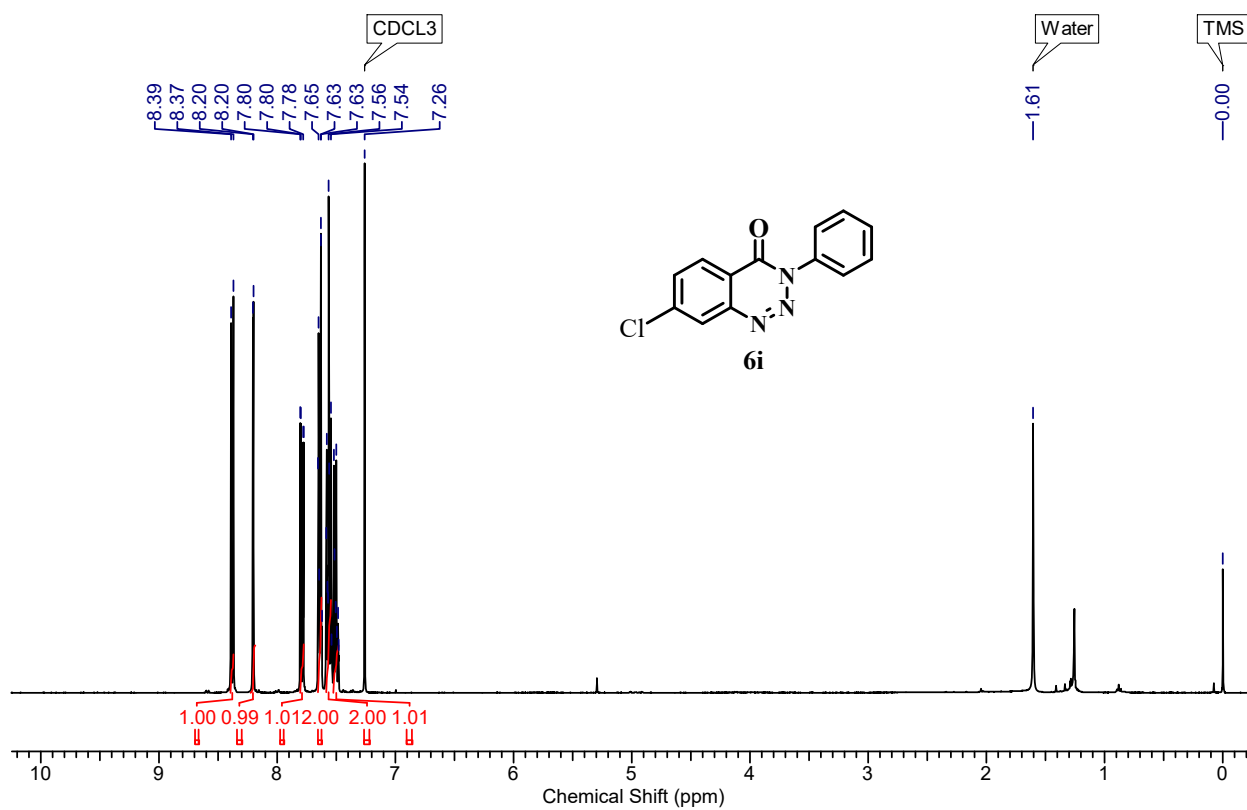

**<sup>1</sup>H NMR (CDCl<sub>3</sub>, 400 MHz) of Compound 6i**

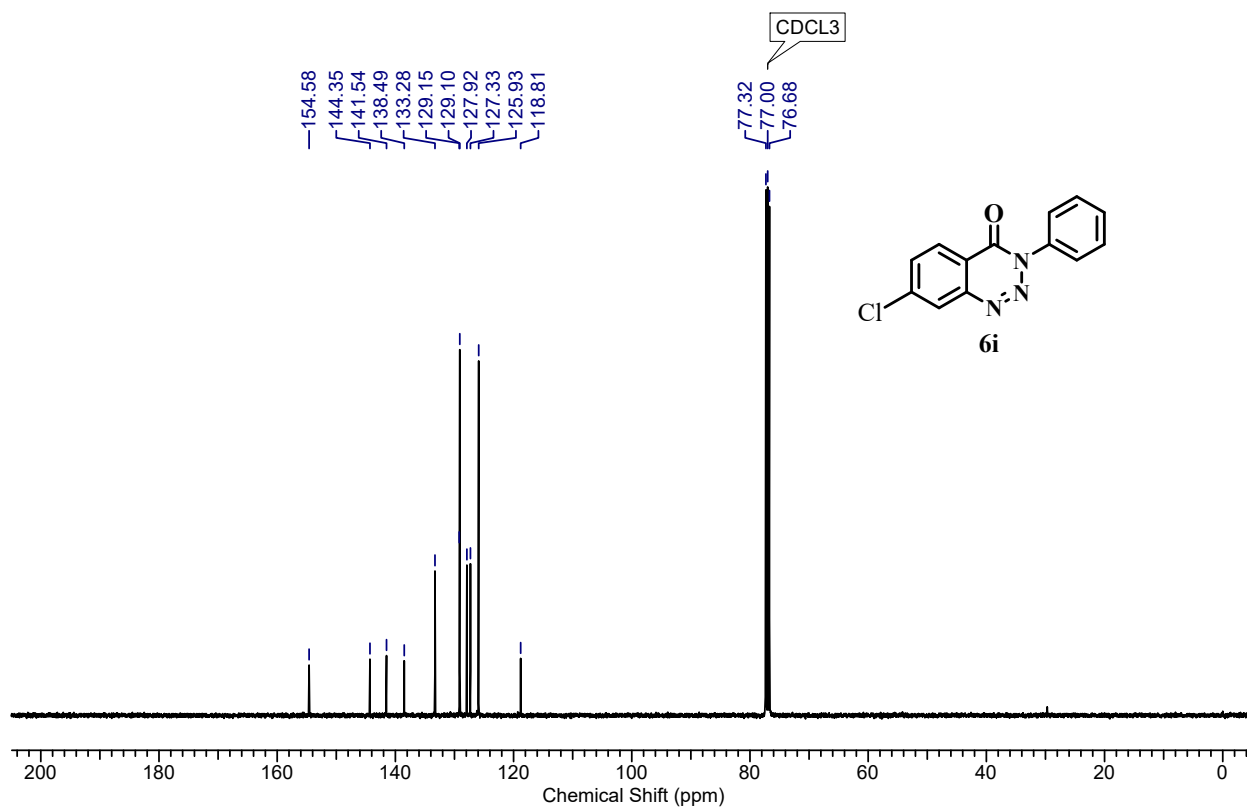

### <sup>13</sup>C NMR (CDCl<sub>3</sub>, 100 MHz) of Compound 6i

BAA-9 #344 RT: 1.88 AV: 1 NL: 3.76E7  
T: FTMS + p ESI Full ms [100.0000-1500.0000]

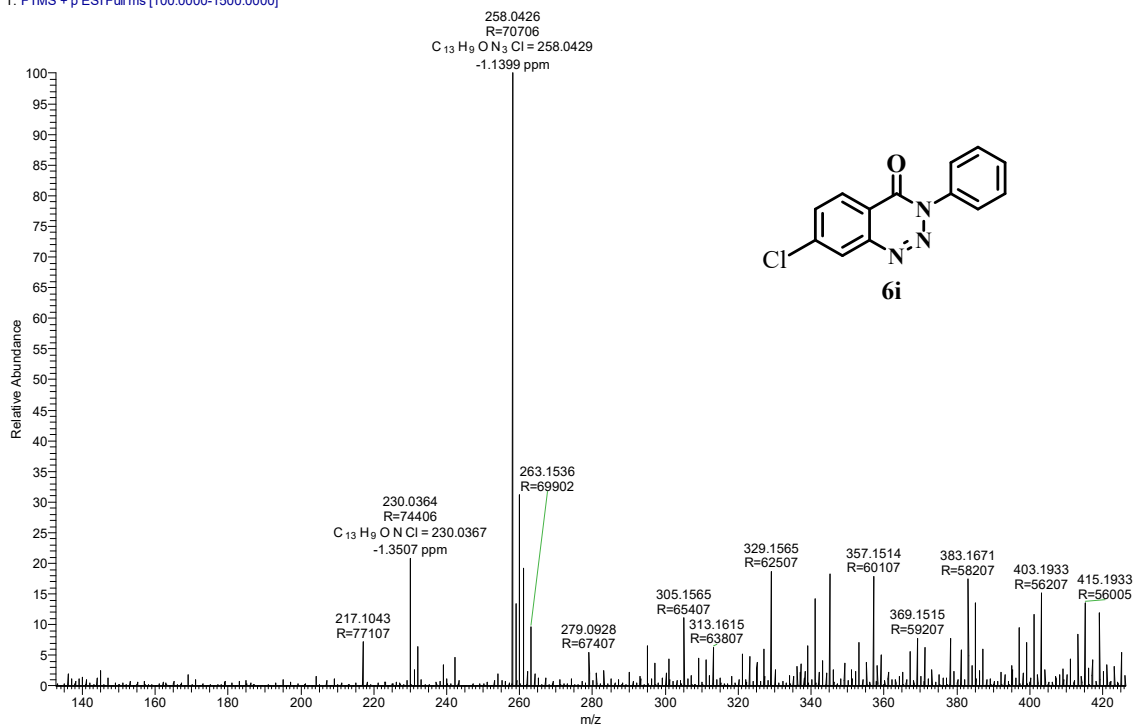

### HRMS of Compound 6i

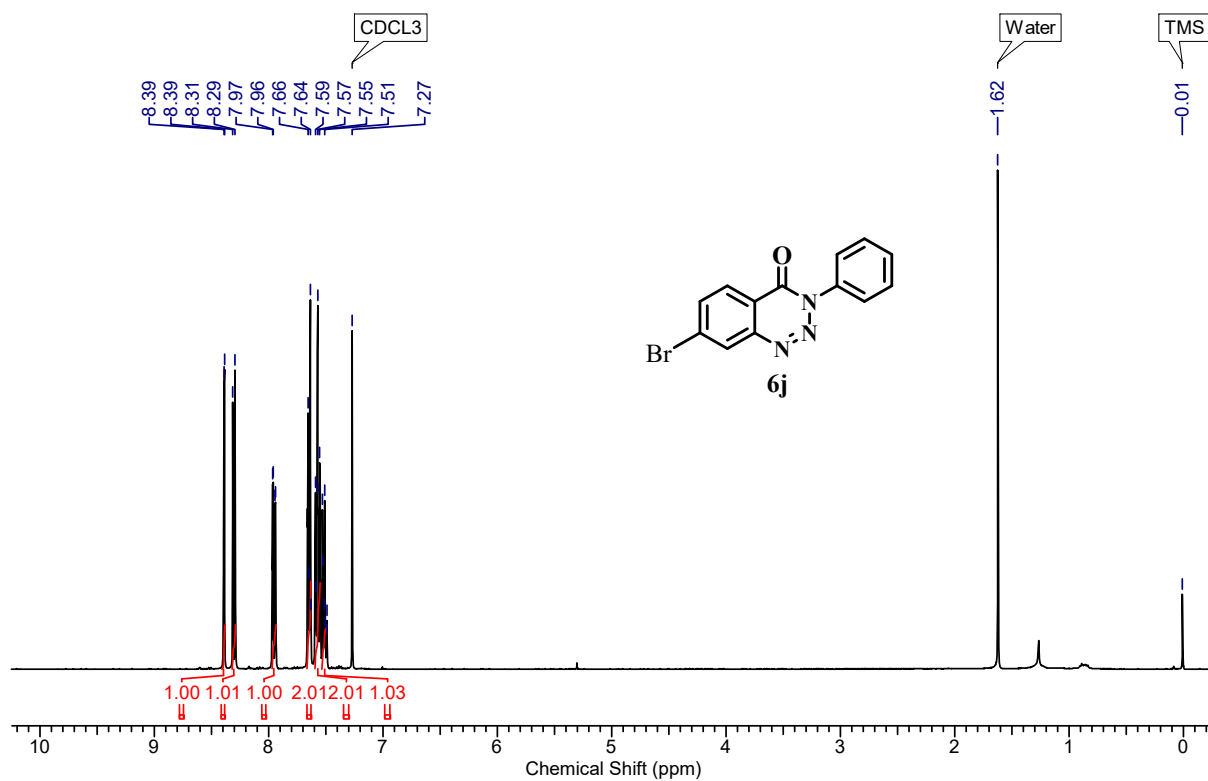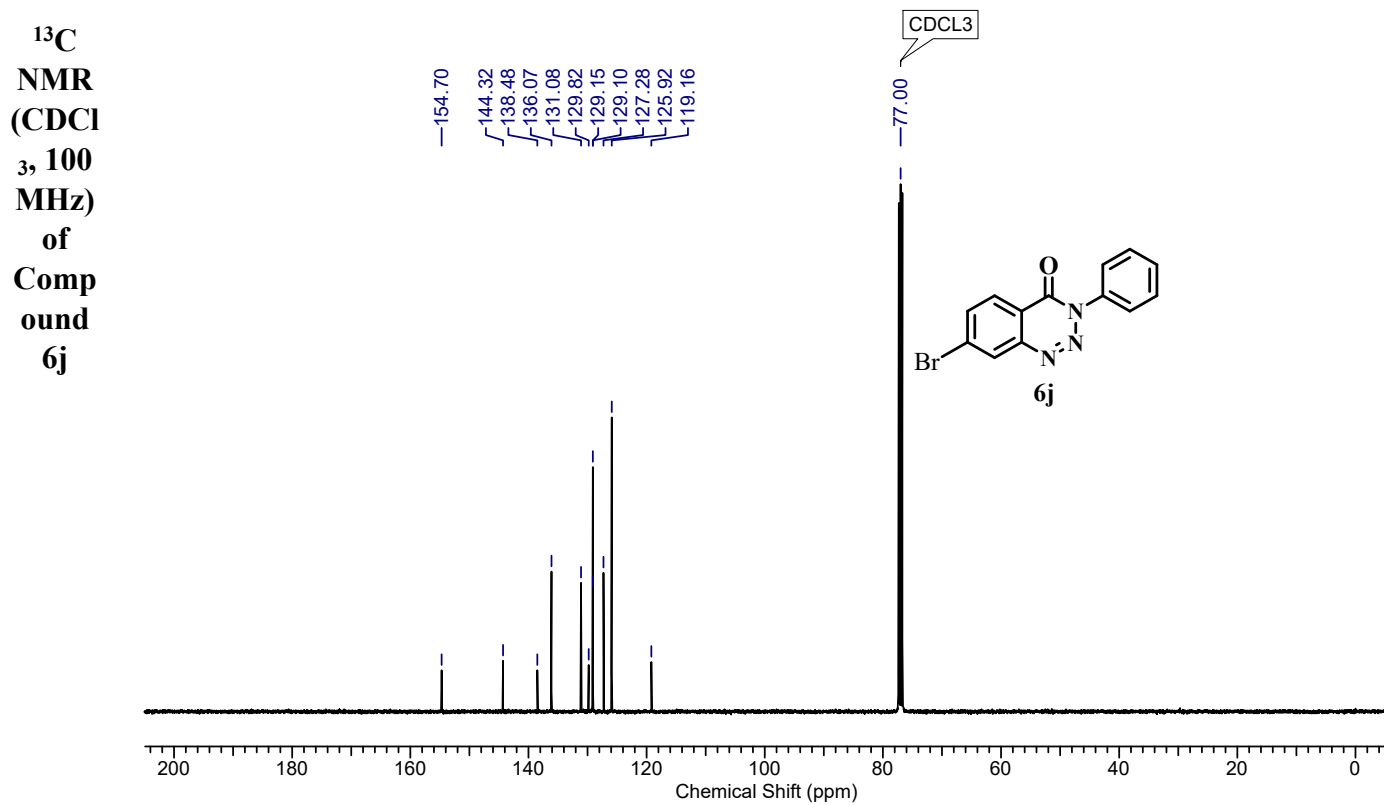

BAA-10 #393 RT: 2.24 AV: 1 NL: 2.03E7  
T: FTMS + p ESI Full ms [100.0000-1500.0000]

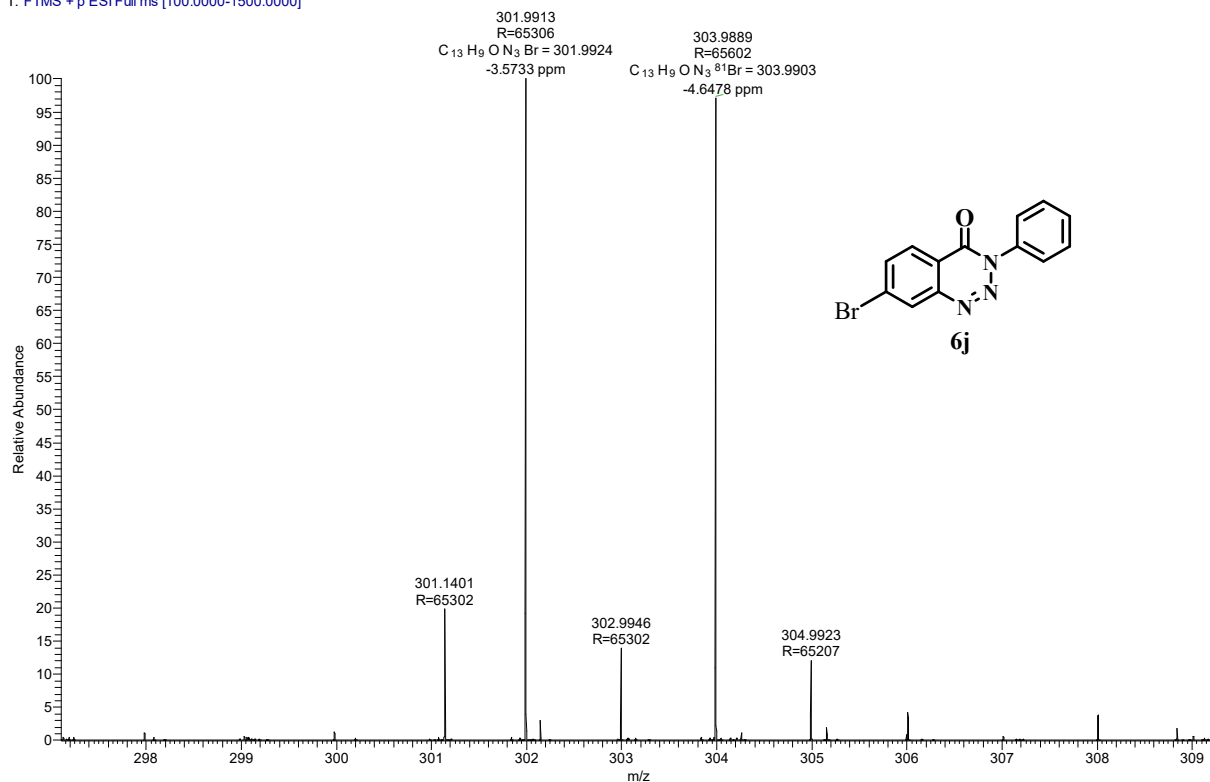

### HRMS of Compound 6j

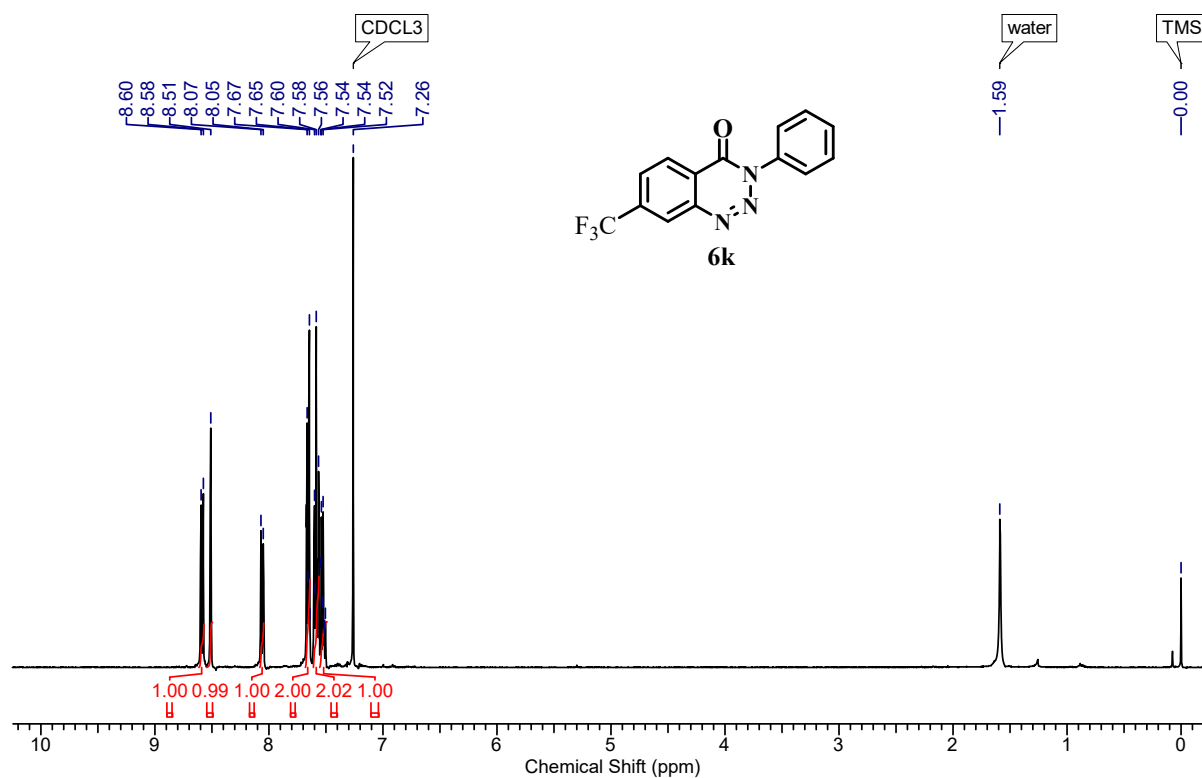

### <sup>1</sup>H NMR (CDCl<sub>3</sub>, 400 MHz) of Compound 6k

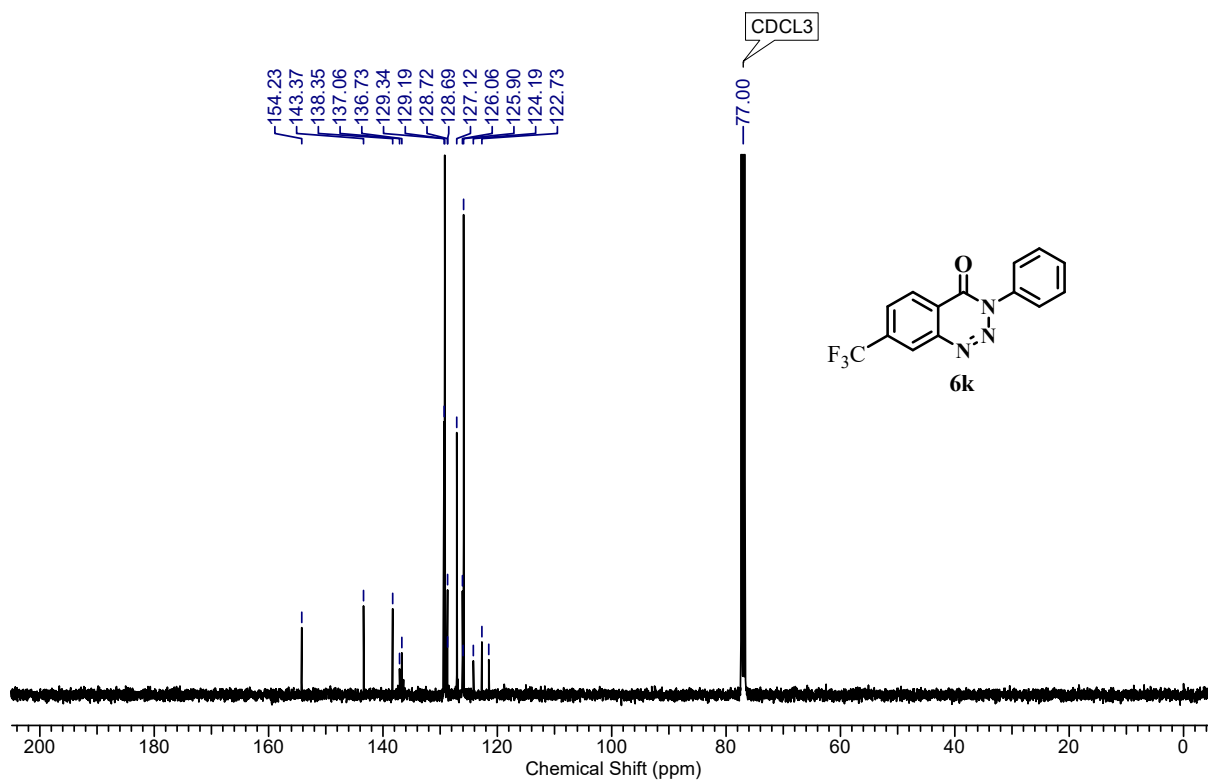

**<sup>13</sup>C NMR (CDCl<sub>3</sub>, 100 MHz) of Compound 6k**

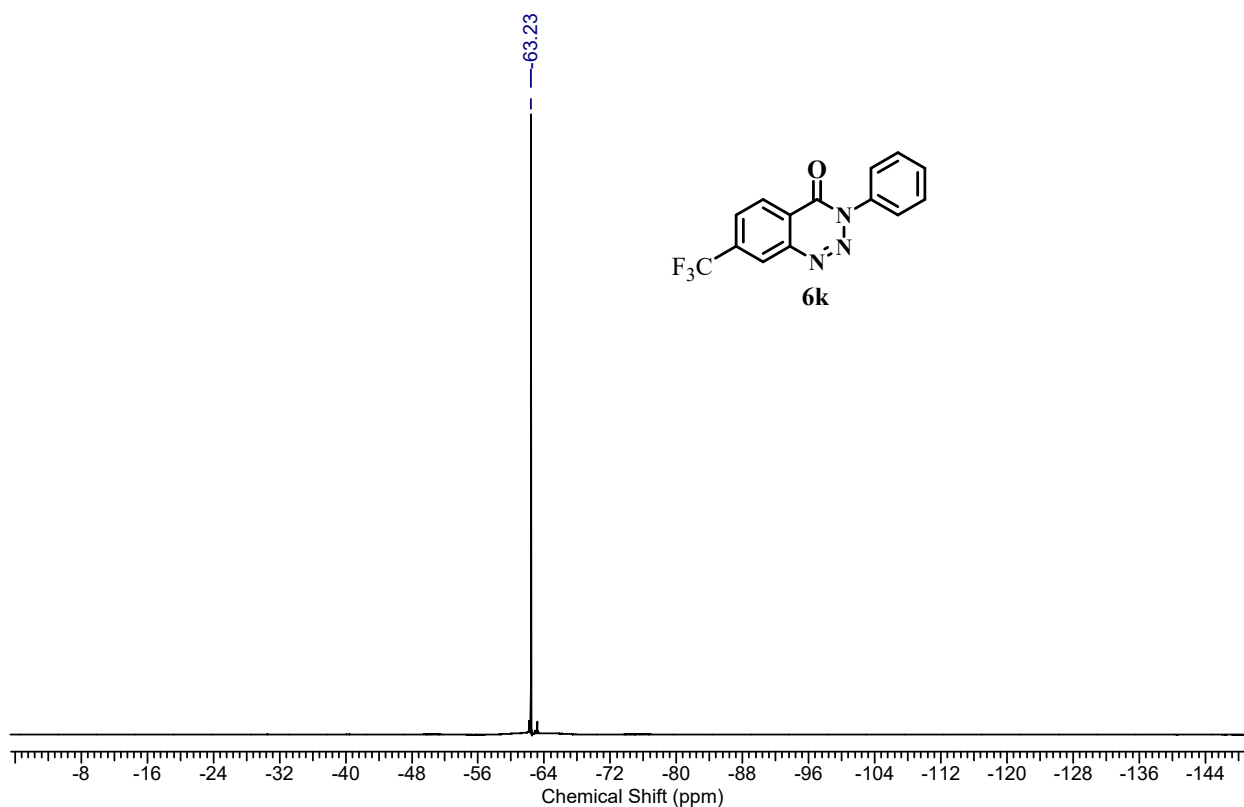

**<sup>19</sup>F NMR (CDCl<sub>3</sub>, 376 MHz) of Compound 6k**

BAA-11 #386 RT: 2.20 AV: 1 NL: 7.32E7  
T: FTMS + p ESI Full ms [100.0000-1500.0000]

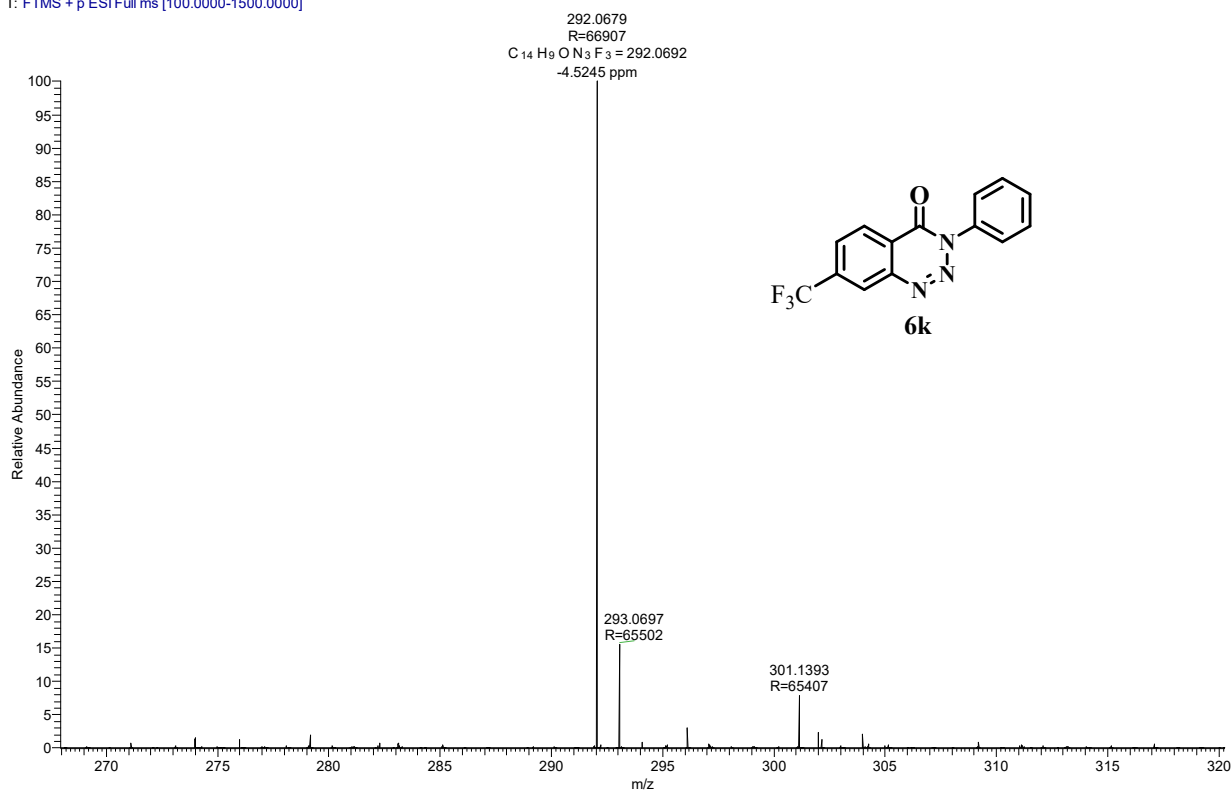

**HRMS of Compound 6k**

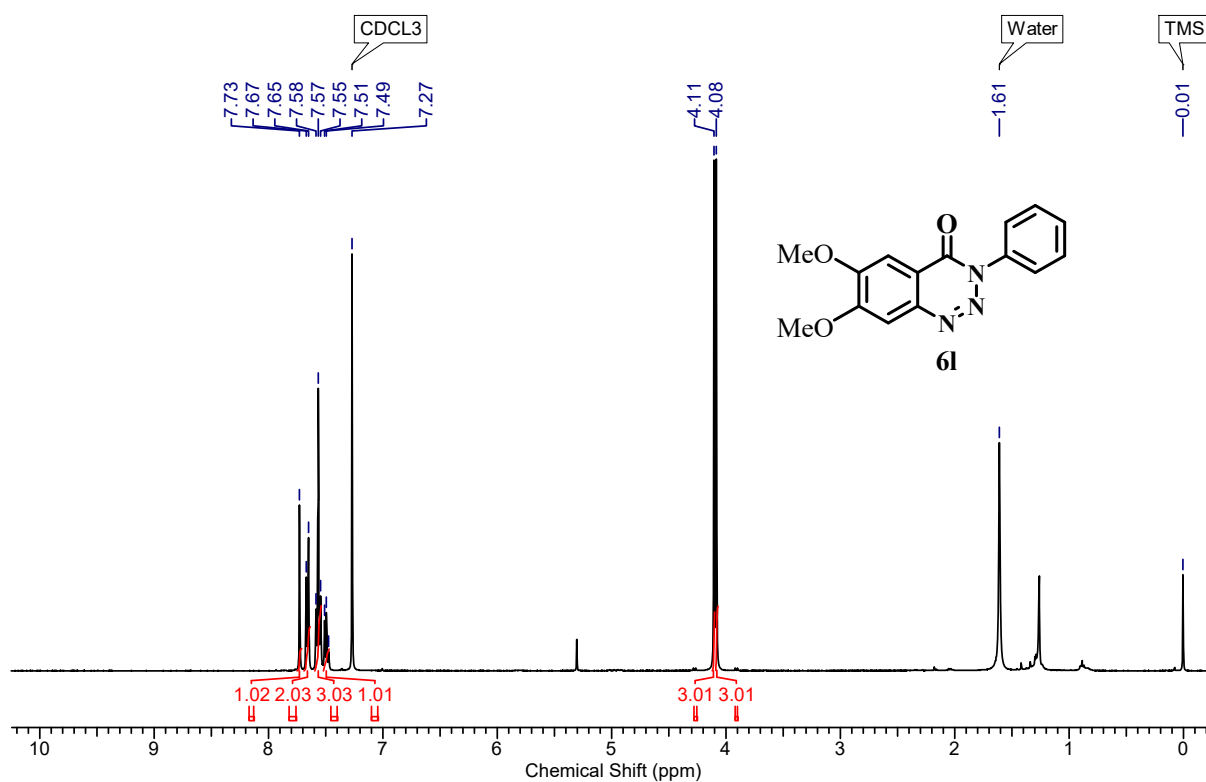

**<sup>1</sup>H NMR (CDCl<sub>3</sub>, 400 MHz) of Compound 6l**

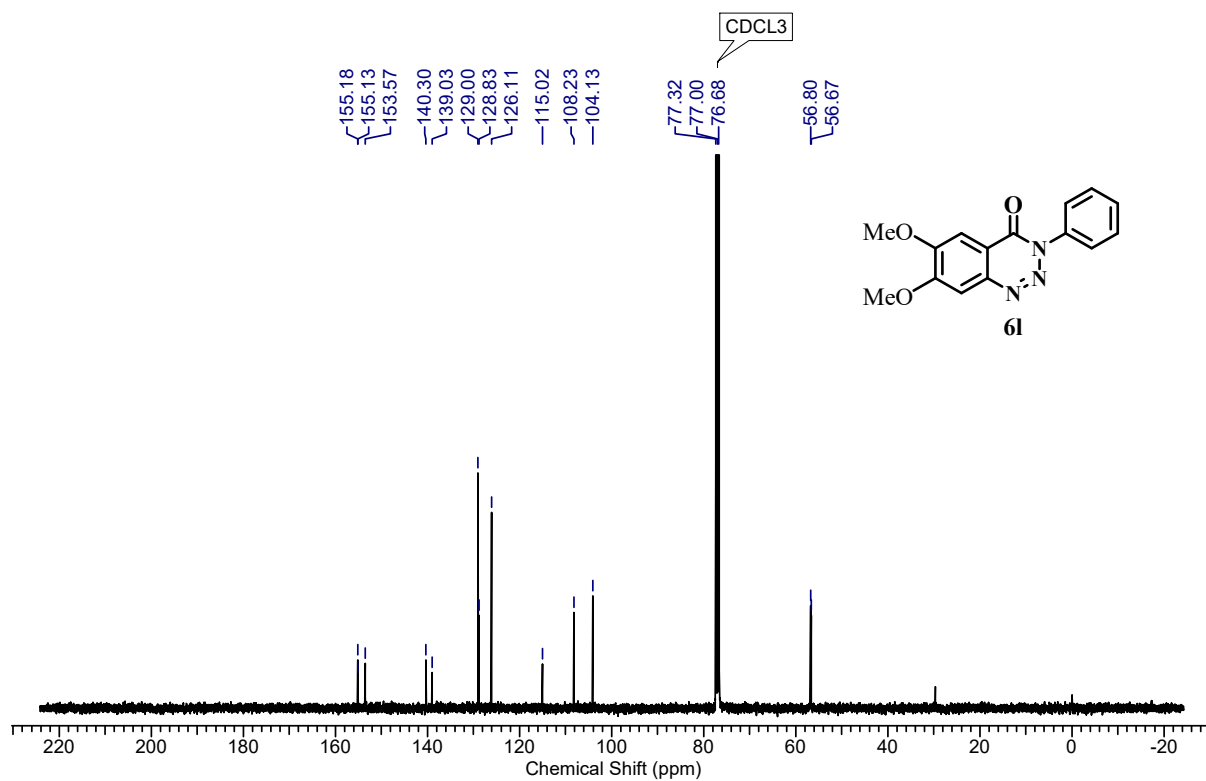

**<sup>13</sup>C NMR (CDCl<sub>3</sub>, 100 MHz) of Compound 6l**

BAA-13 #319 RT: 1.74 AV: 1 NL: 1.23E9  
T: FTMS + p ESI Full ms [100.0000-1500.0000]

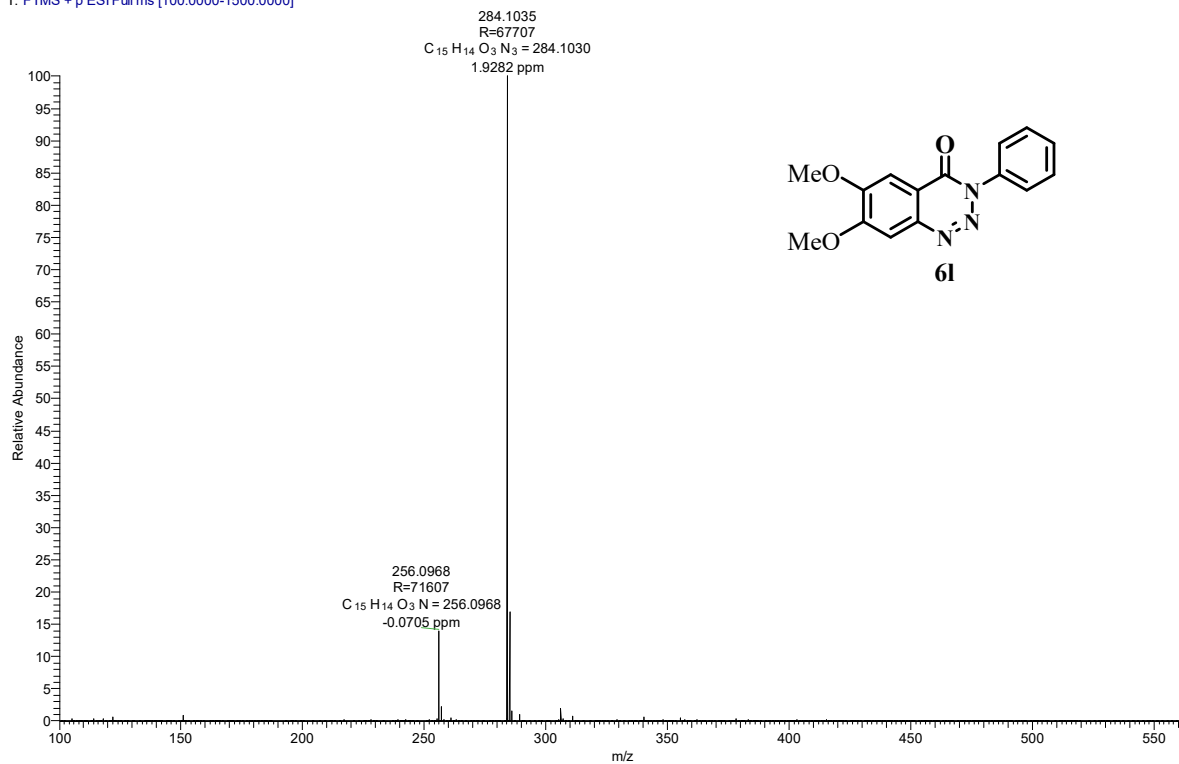

### HRMS of Compound 61

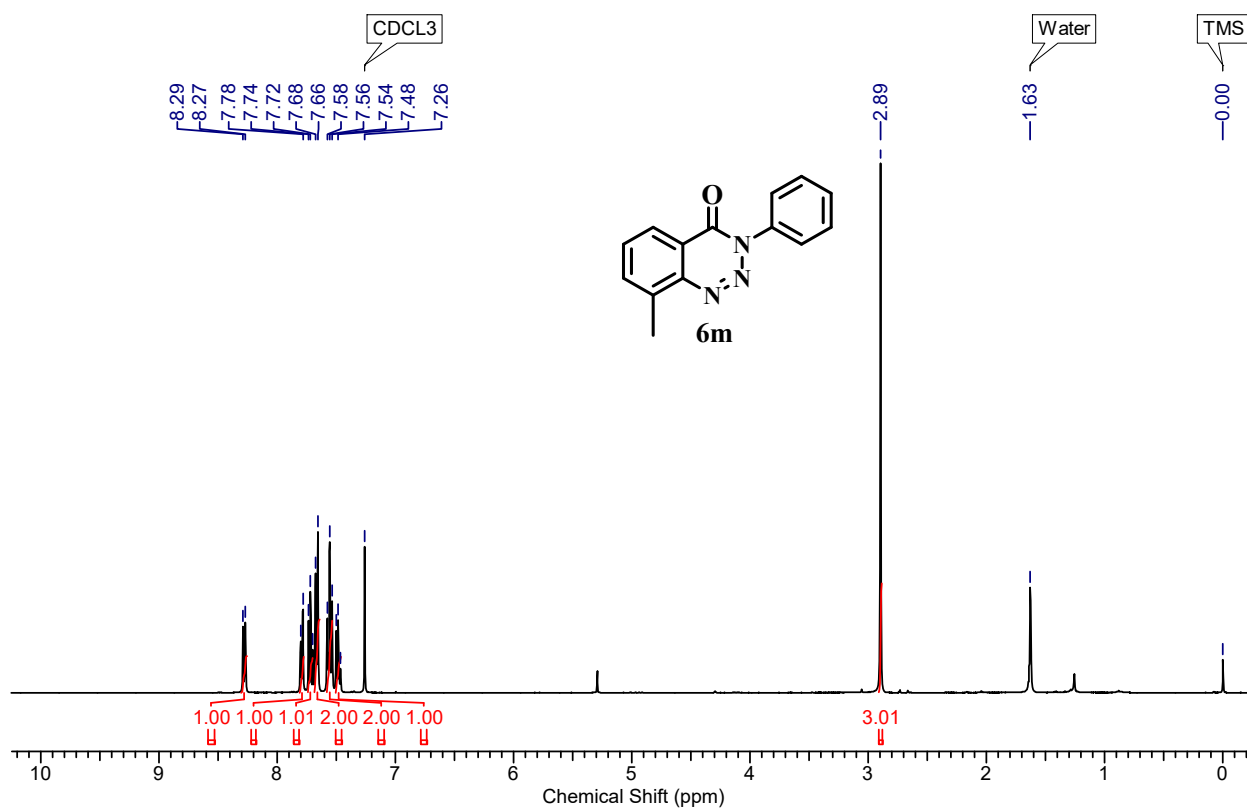

### <sup>1</sup>H NMR (CDCl<sub>3</sub>, 400 MHz) of Compound 6m

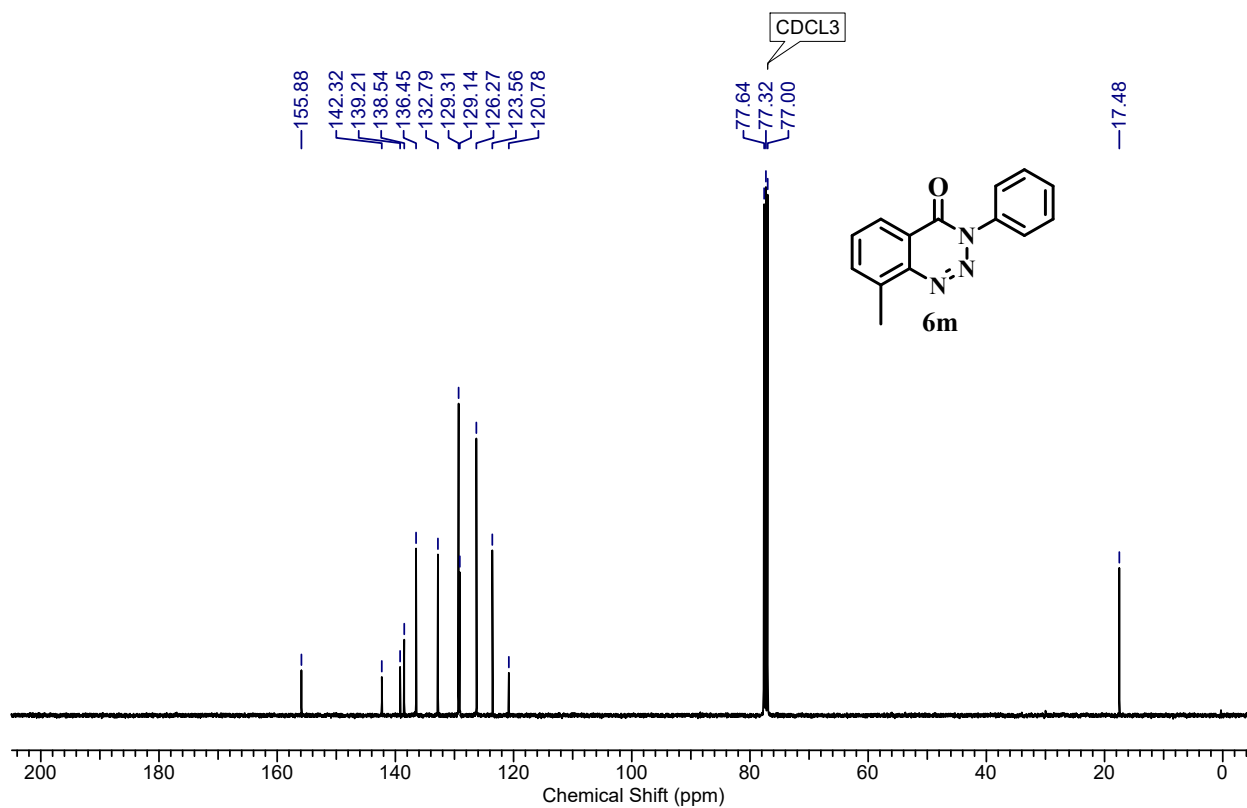

### <sup>13</sup>C NMR (CDCl<sub>3</sub>, 100 MHz) of Compound 6m

BAA-14 #347 RT: 1.90 AV: 1 NL: 1.13E8  
T: FTMS + p ESI Full ms [100.0000-1500.0000]

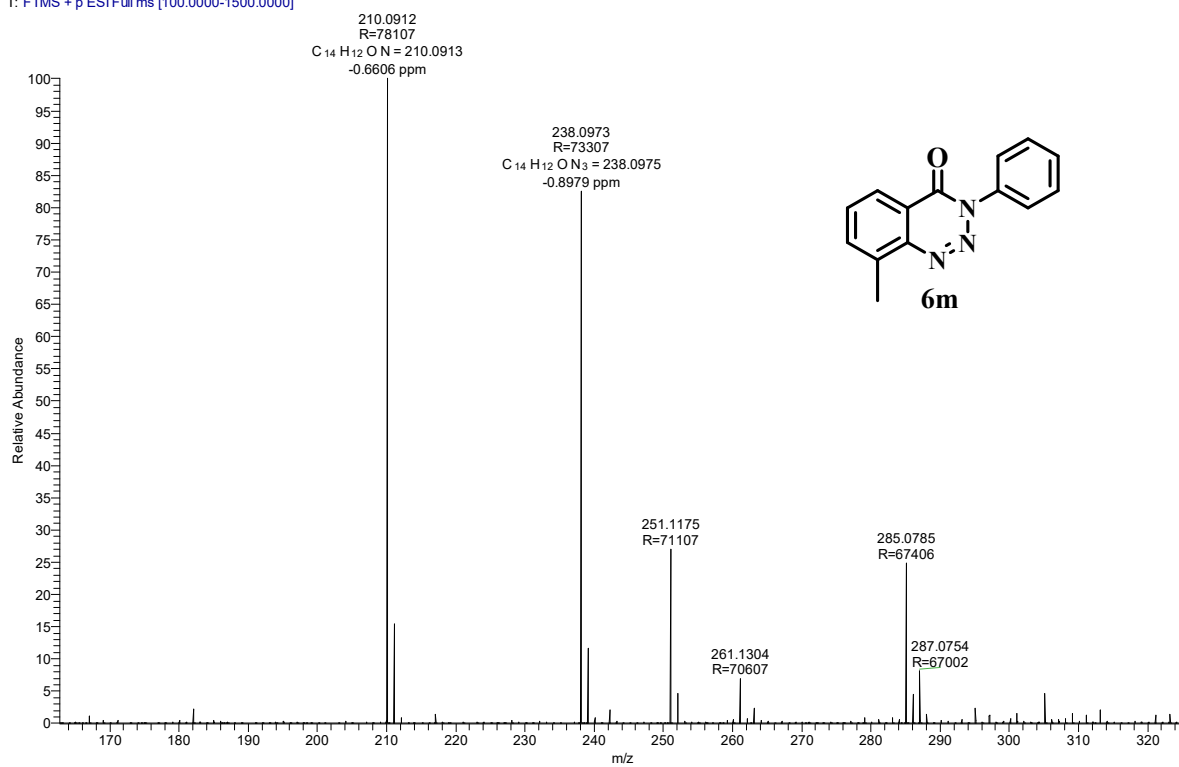

### HRMS of Compound 6m

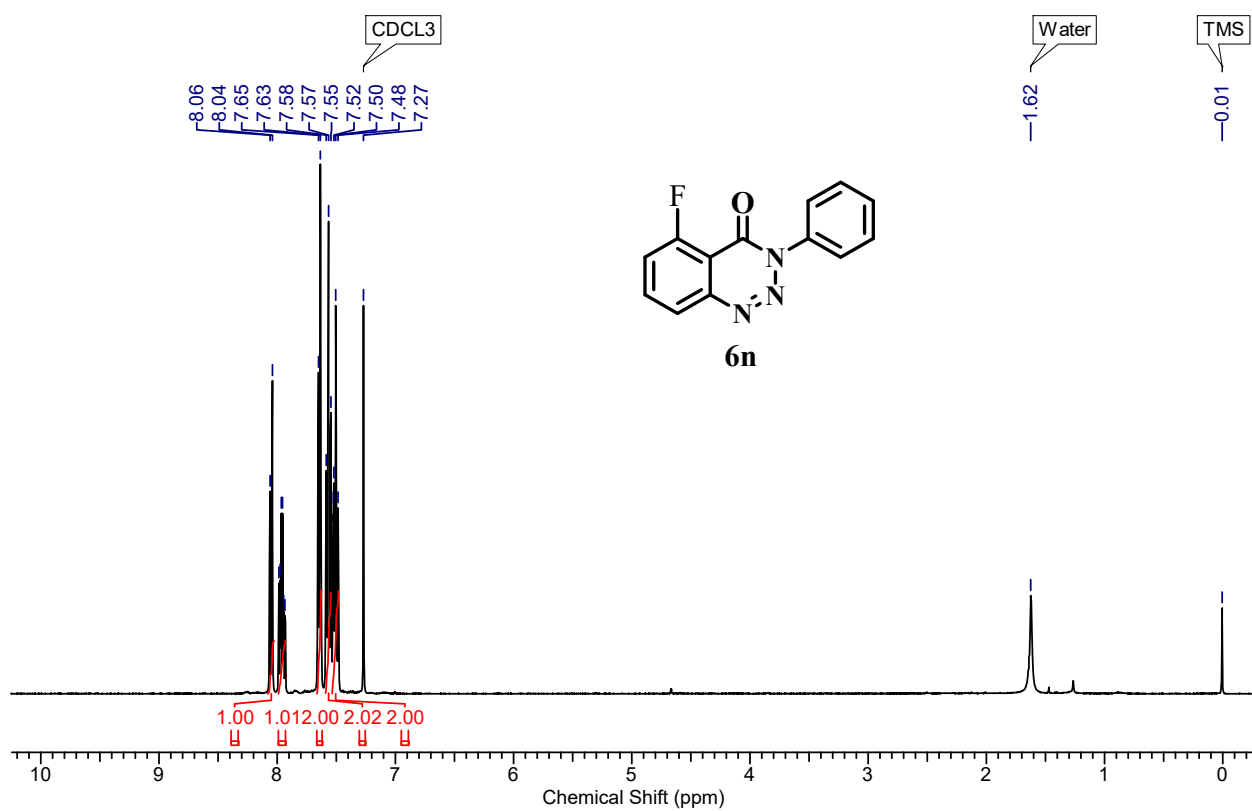

**<sup>1</sup>H NMR (CDCl<sub>3</sub>, 400 MHz) of Compound 6n**

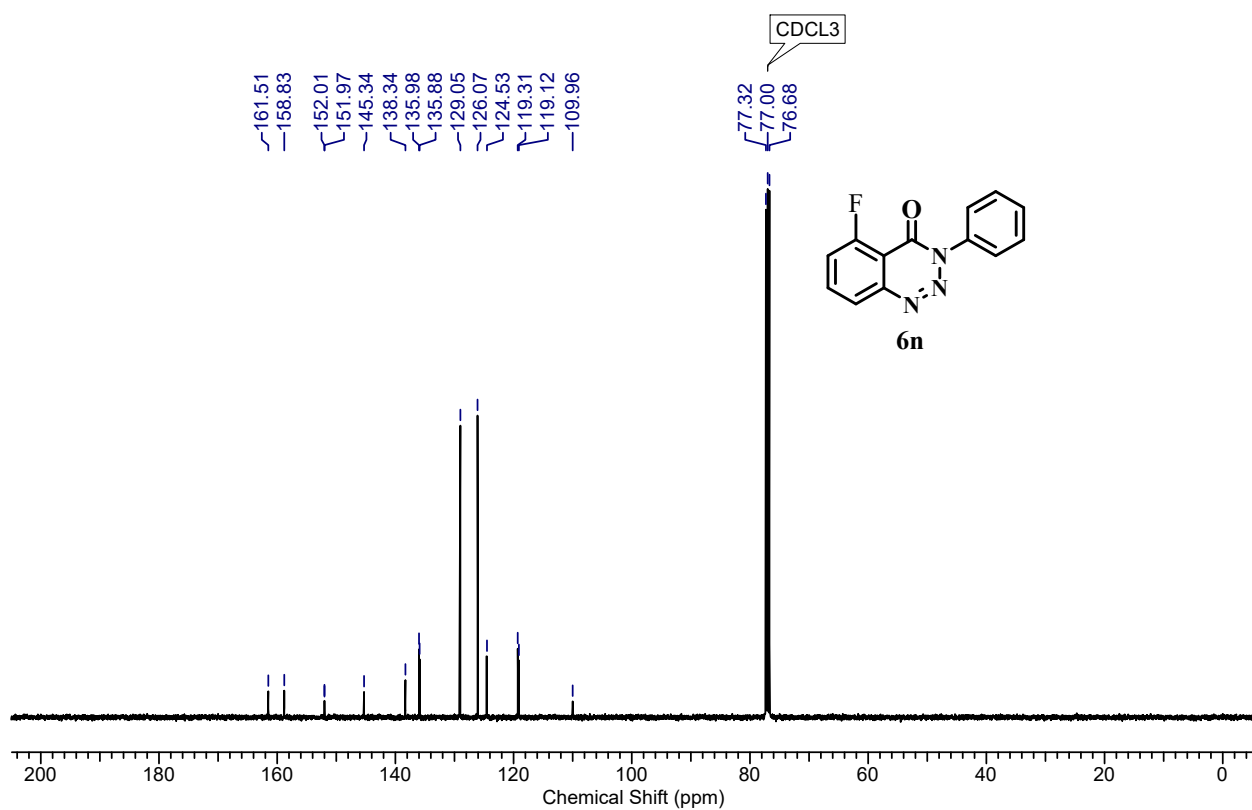

**$^{13}\text{C}$  NMR ( $\text{CDCl}_3$ , 100 MHz) of Compound 6n**

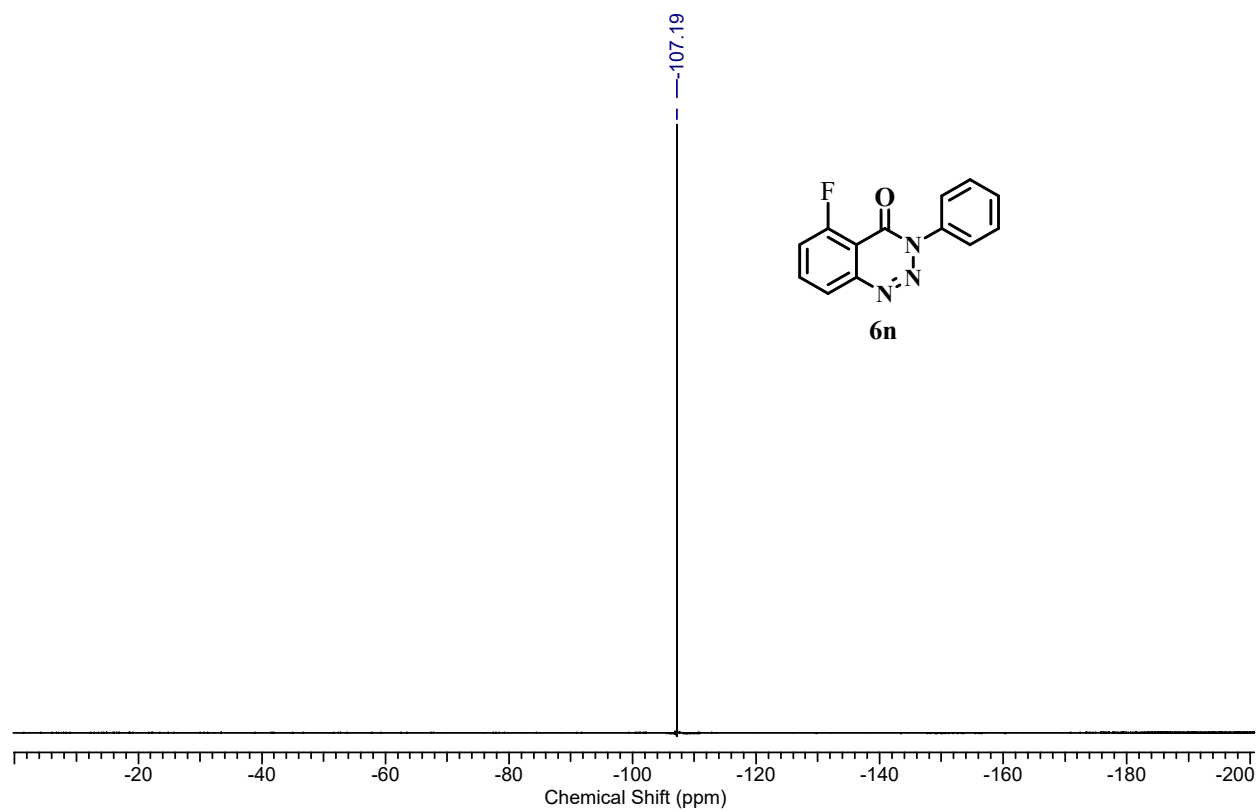

**$^{19}\text{F}$  NMR ( $\text{CDCl}_3$ , 376 MHz) of Compound 6n**

BAA-15 #318 RT: 1.77 AV: 1 NL: 6.39E7  
T: FTMS + p ESI Full ms [100.0000-1500.0000]

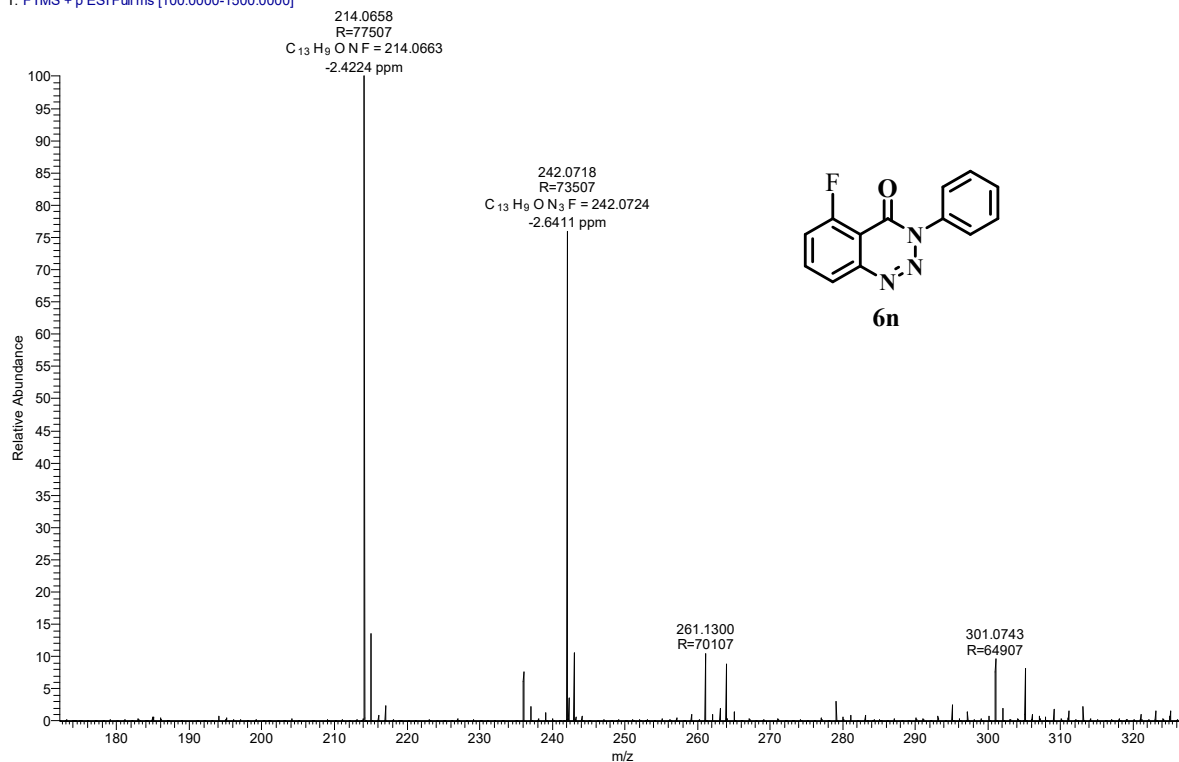

### HRMS of Compound 6n

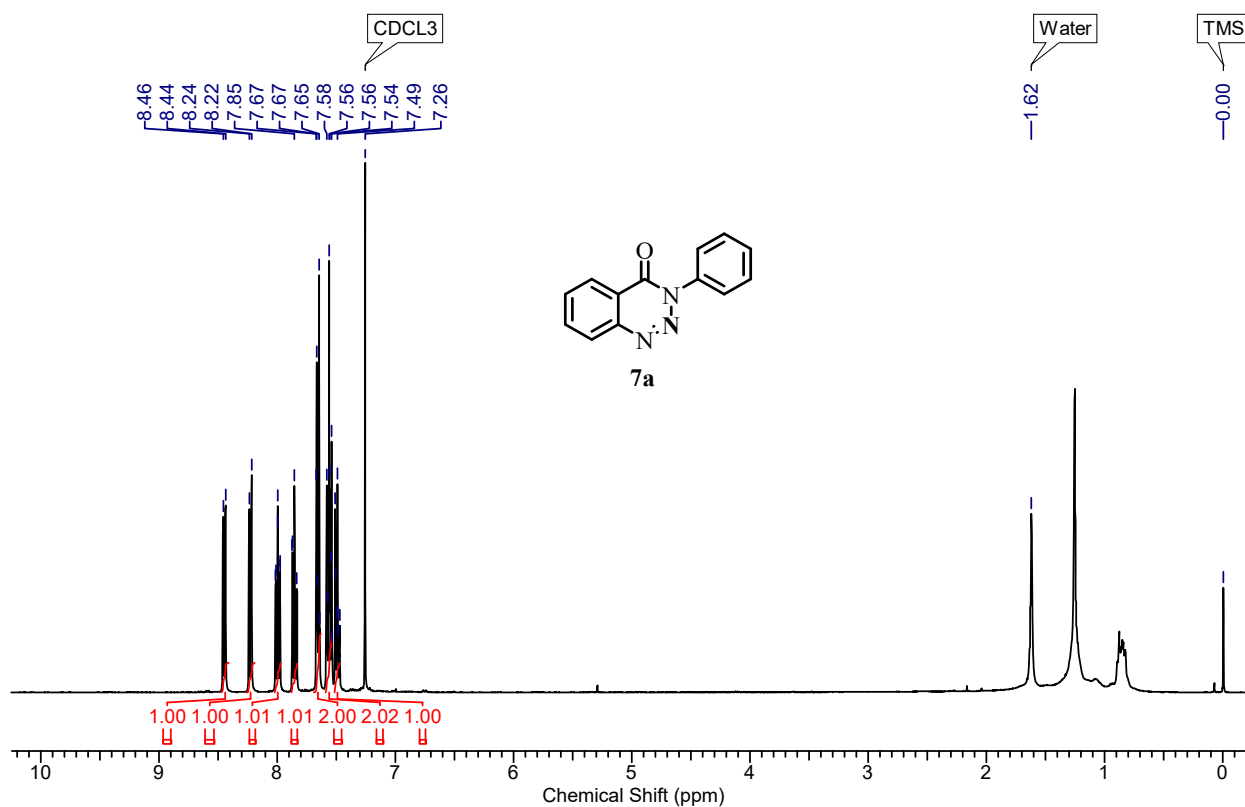

### <sup>1</sup>H NMR (CDCl<sub>3</sub>, 400 MHz) of Compound 7a

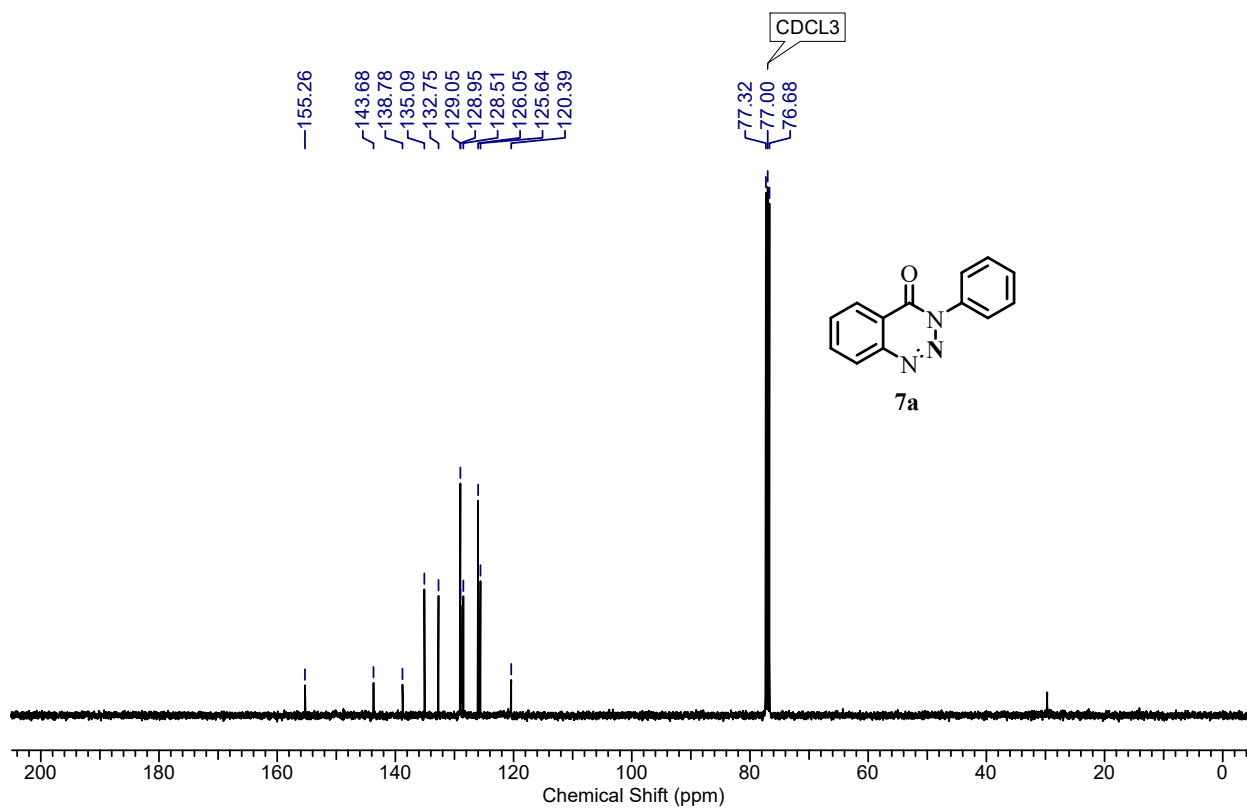

**<sup>13</sup>C NMR (CDCl<sub>3</sub>, 100 MHz) of Compound 7a**

BAA-16 #310 RT: 1.76 AV: 1 NL: 2.20E8  
T: FTMS + p ESI Full ms [100.0000-1500.0000]

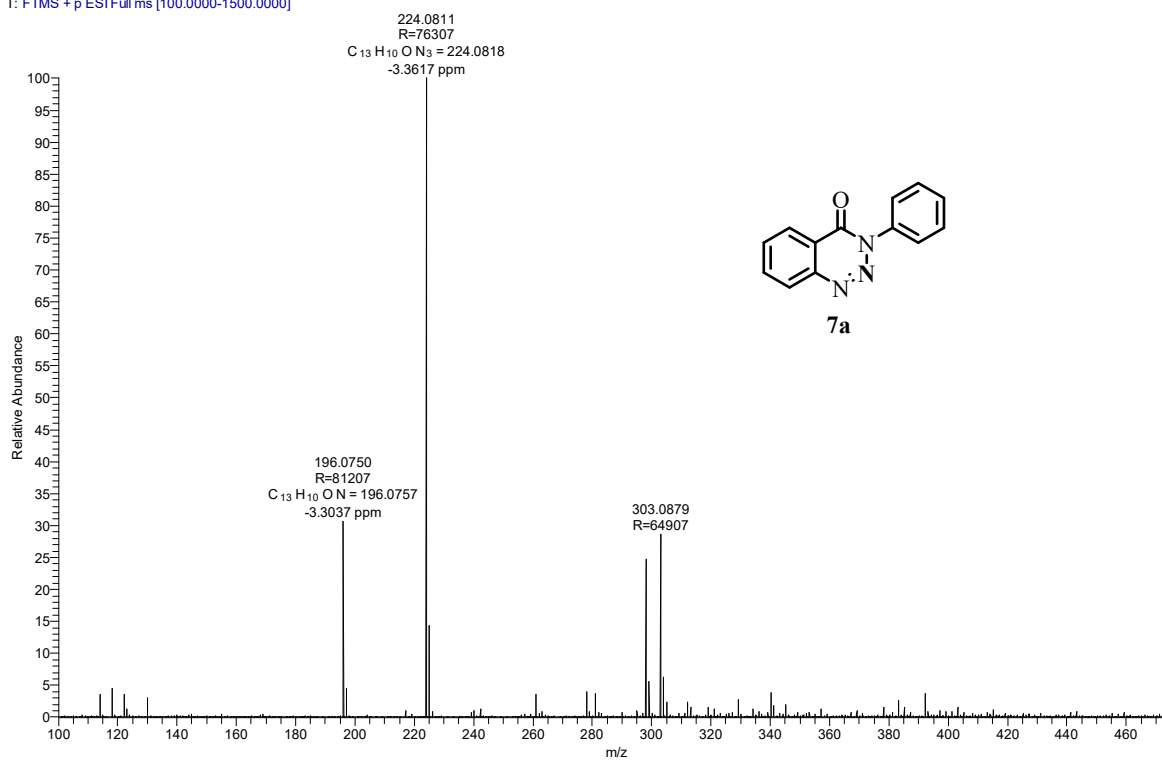

# HRMS of Compound 7a

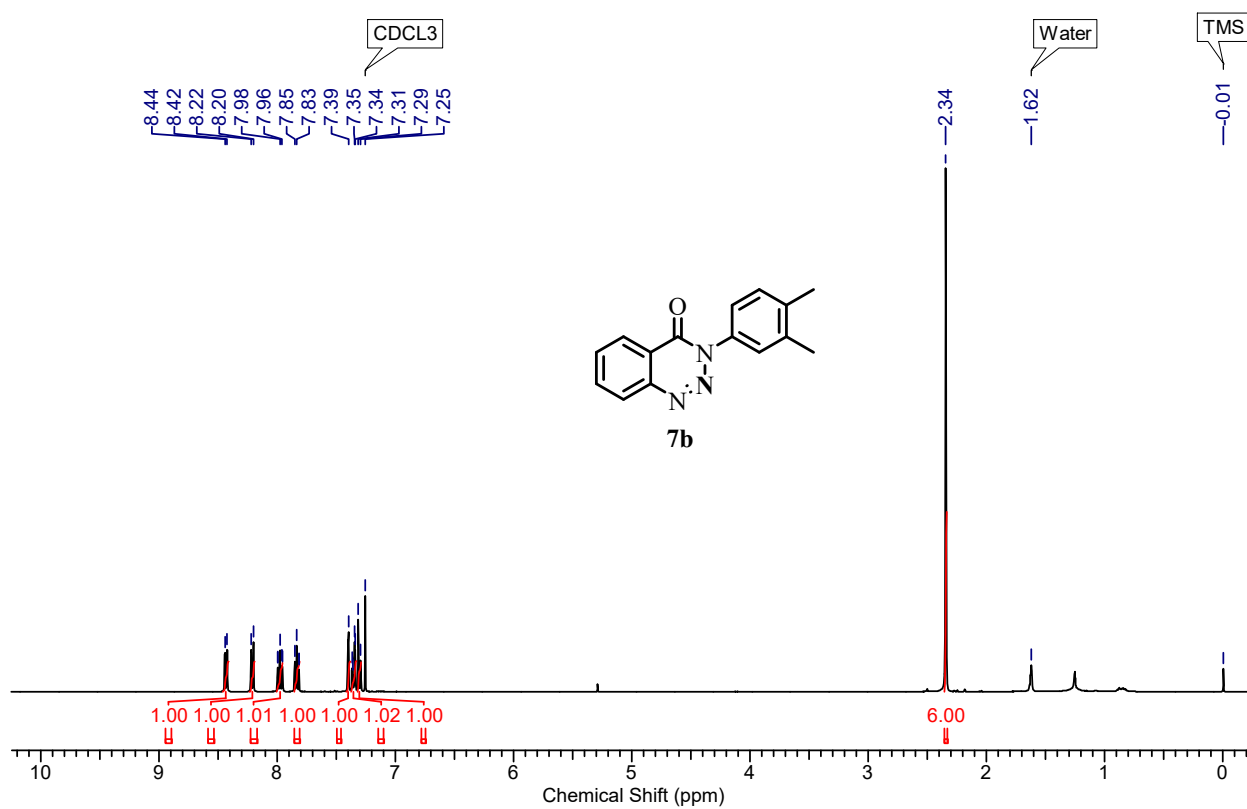

## <sup>1</sup>H NMR (CDCl<sub>3</sub>, 400 MHz) of Compound 7b

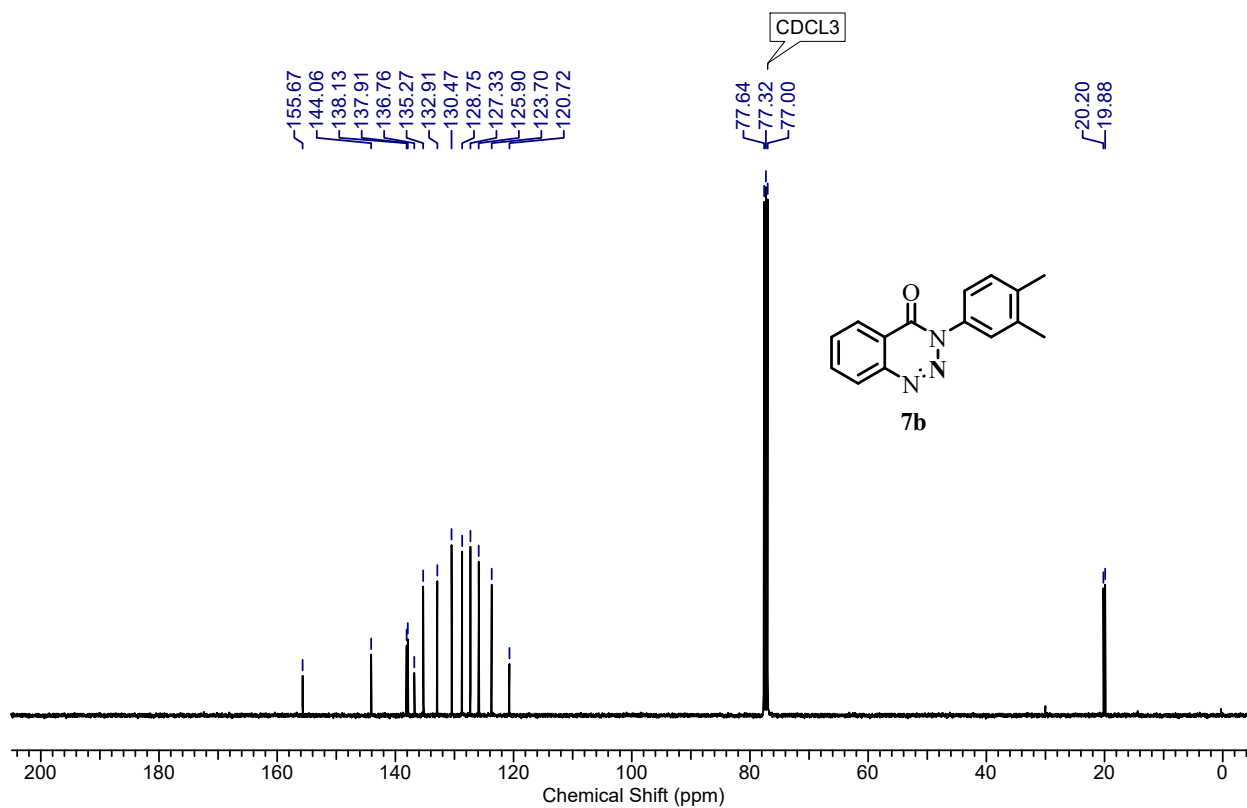

### <sup>13</sup>C NMR (CDCl<sub>3</sub>, 100 MHz) of Compound 7b

BAA-17 #477 RT: 2.55 AV: 1 NL: 4.71E9  
T: FTMS + p ESI Full ms [100.0000-1500.0000]

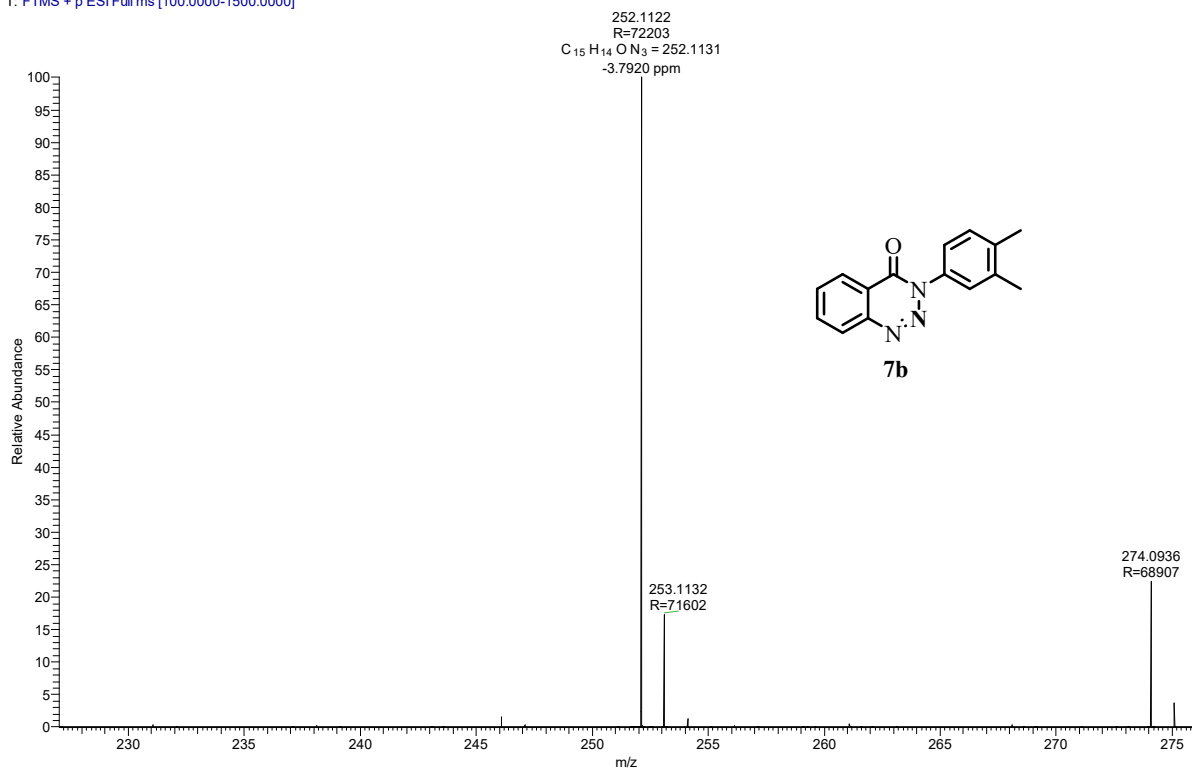

### HRMS of Compound 7b

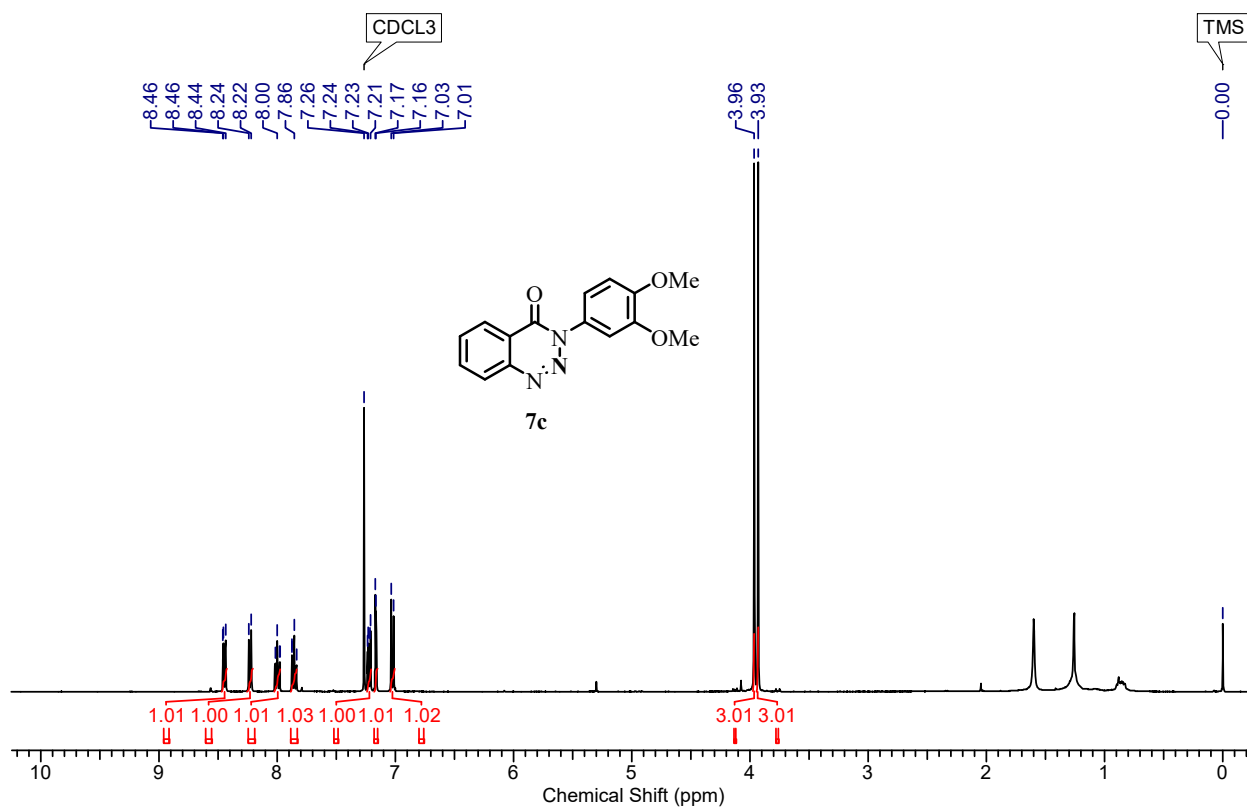

**<sup>1</sup>H NMR (CDCl<sub>3</sub>, 400 MHz) of Compound 7c**

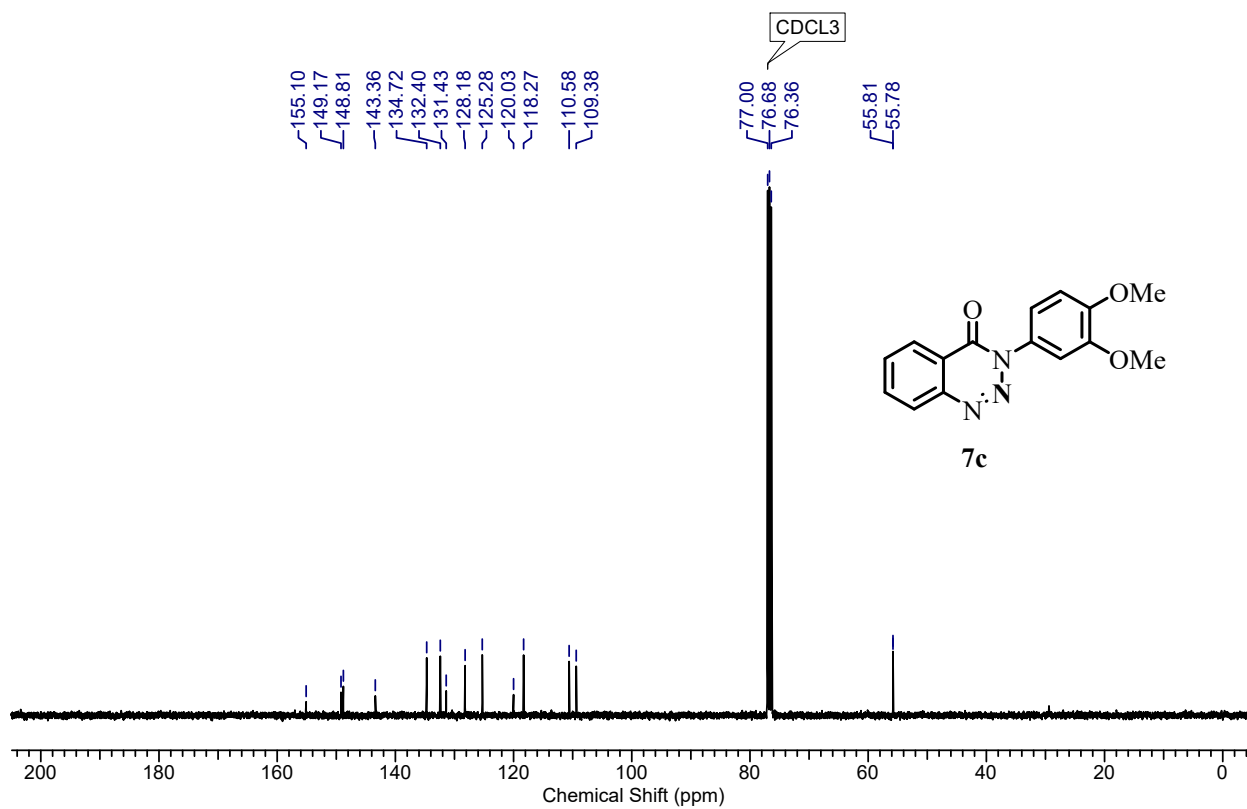

### $^{13}\text{C}$ NMR ( $\text{CDCl}_3$ , 100 MHz) of Compound 7c

BAA-18 #313 RT: 1.82 AV: 1 NL: 3.93E8  
T: FTMS + p ESI Full ms [100.0000-1500.0000]

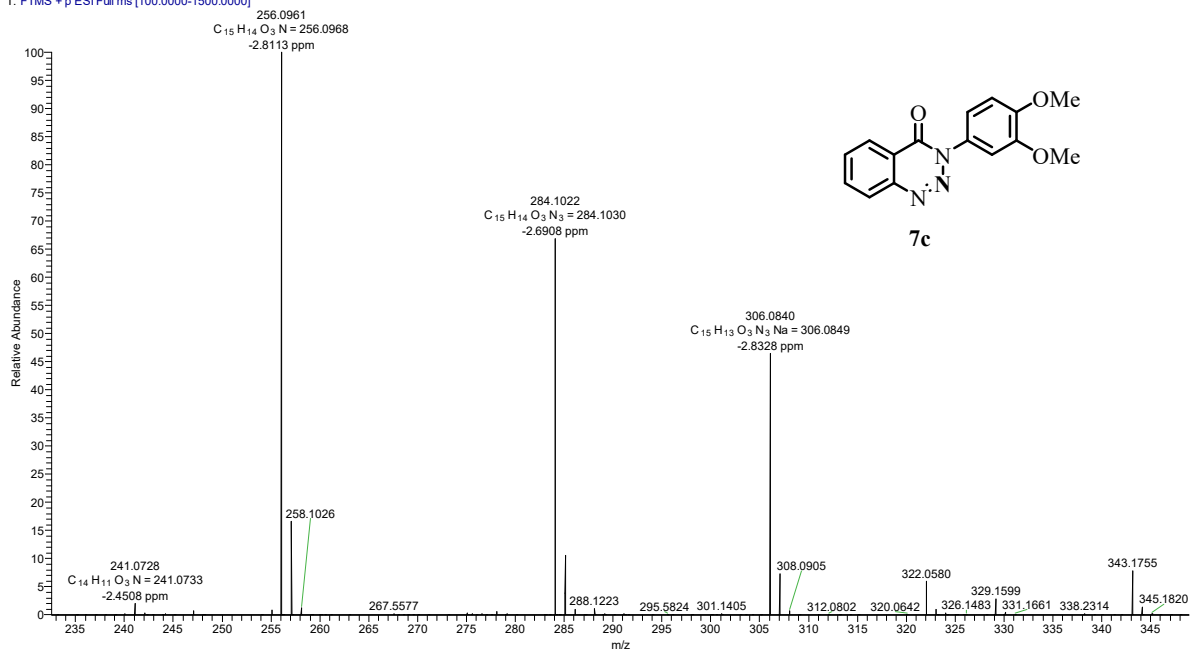

### HRMS of Compound 7c

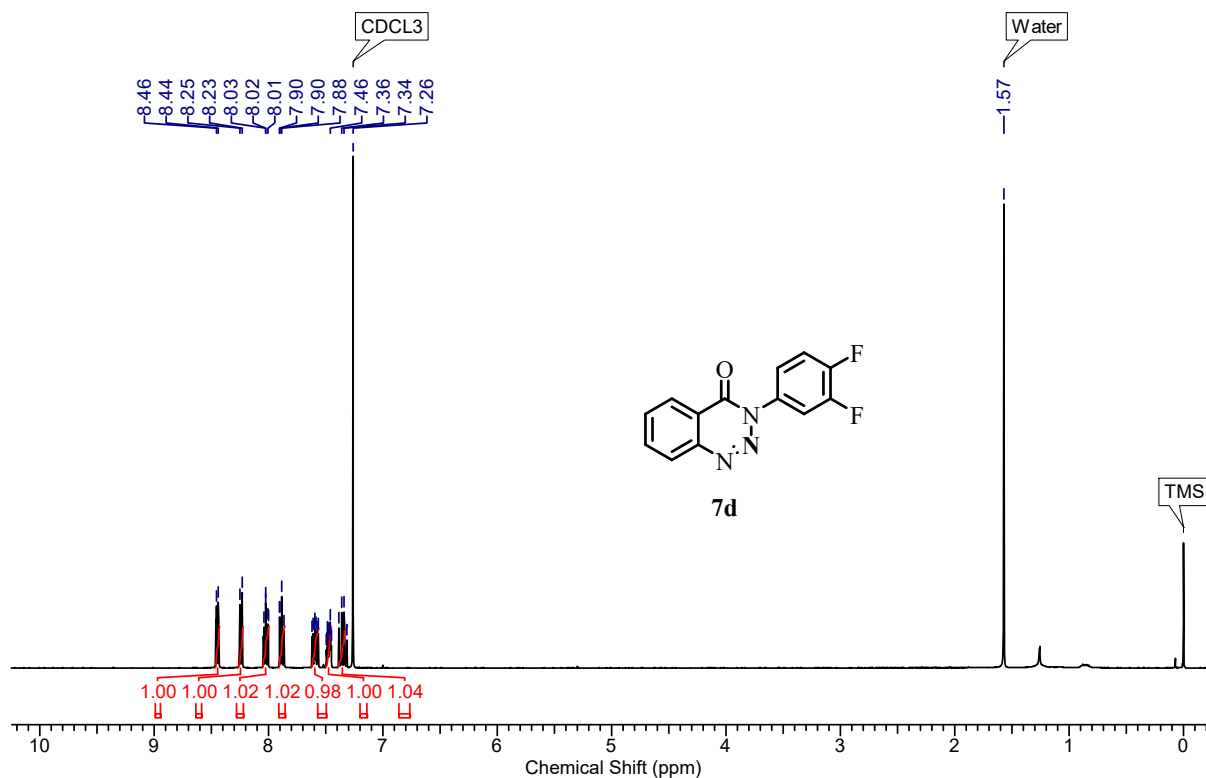

### $^1\text{H}$ NMR ( $\text{CDCl}_3$ , 400 MHz) of Compound 7d

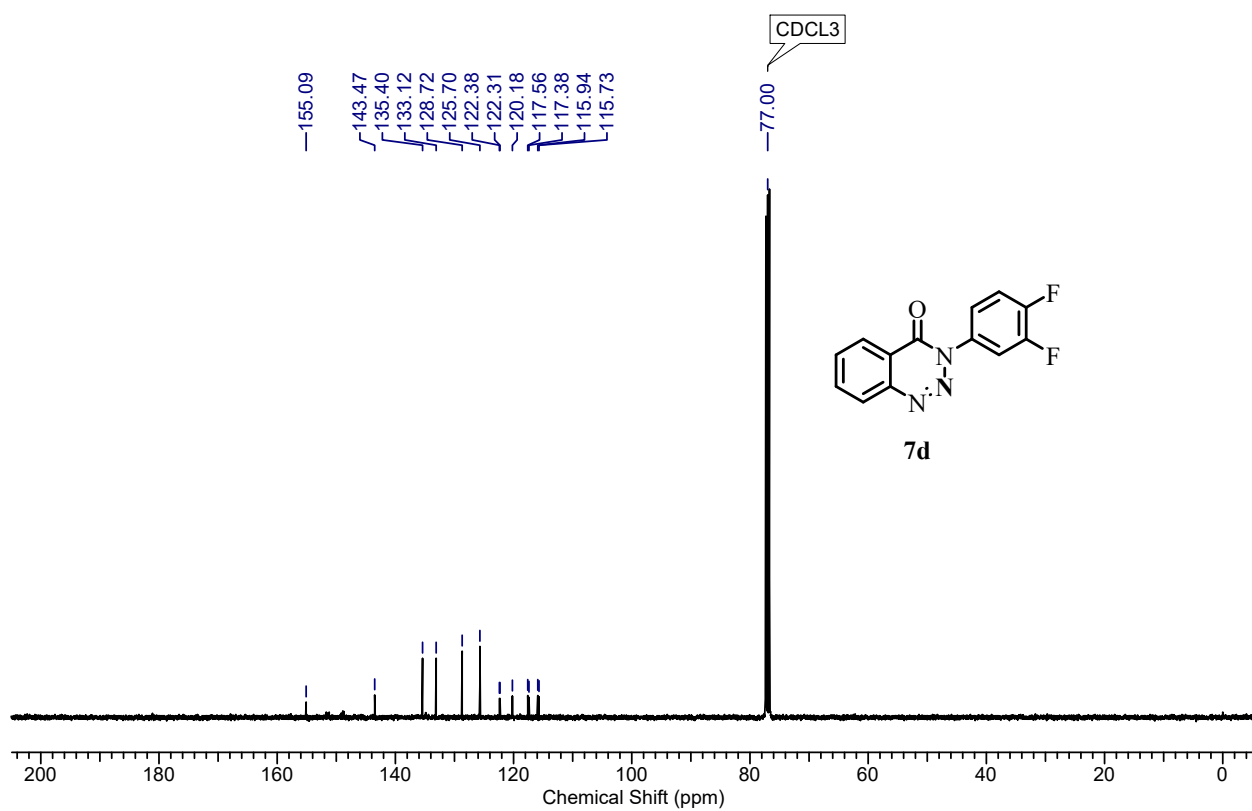

**<sup>13</sup>C NMR (CDCl<sub>3</sub>, 100 MHz) of Compound 7d**

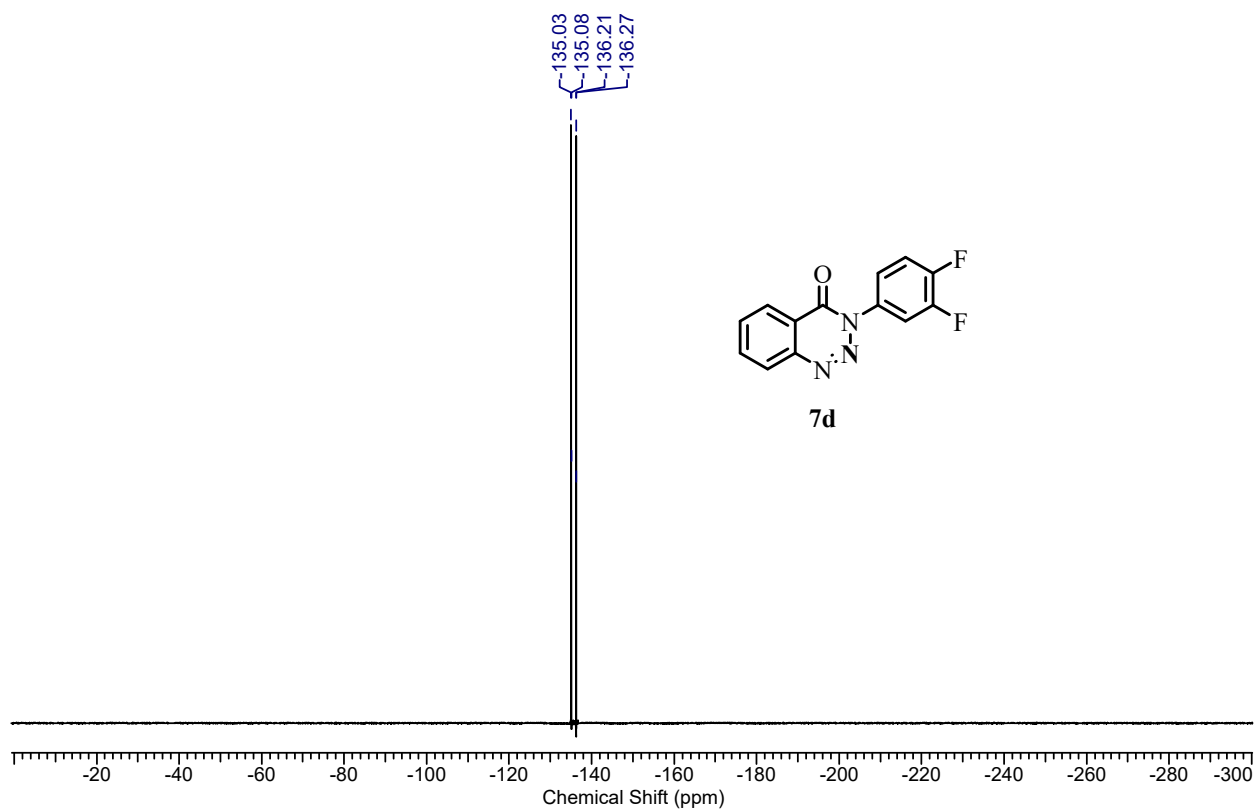

# <sup>19</sup>F NMR (CDCl<sub>3</sub>, 376 MHz) of Compound 7d

BAA-19\_20250918032633 #358 RT: 2.04 AV: 1 NL: 3.47E8  
T: FTMS + p ESI Full ms [100.0000-1500.0000]

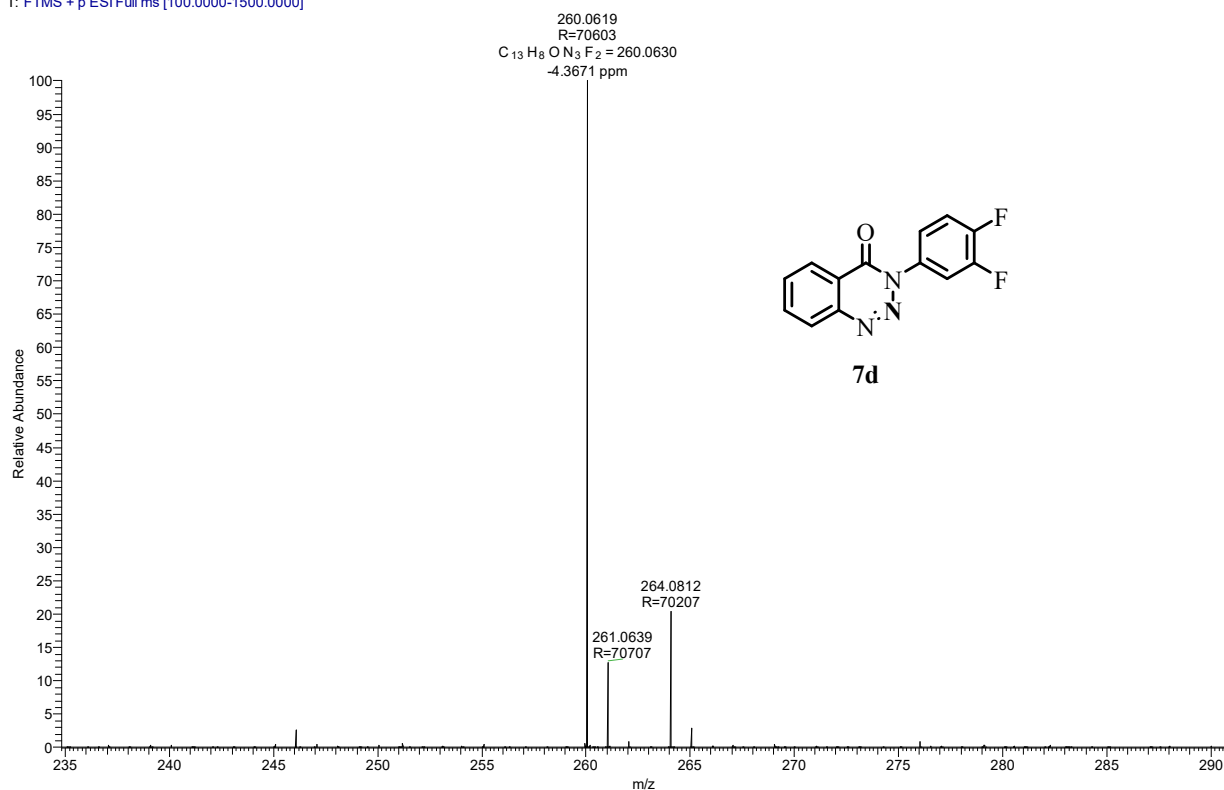

# HRMS of Compound 7d

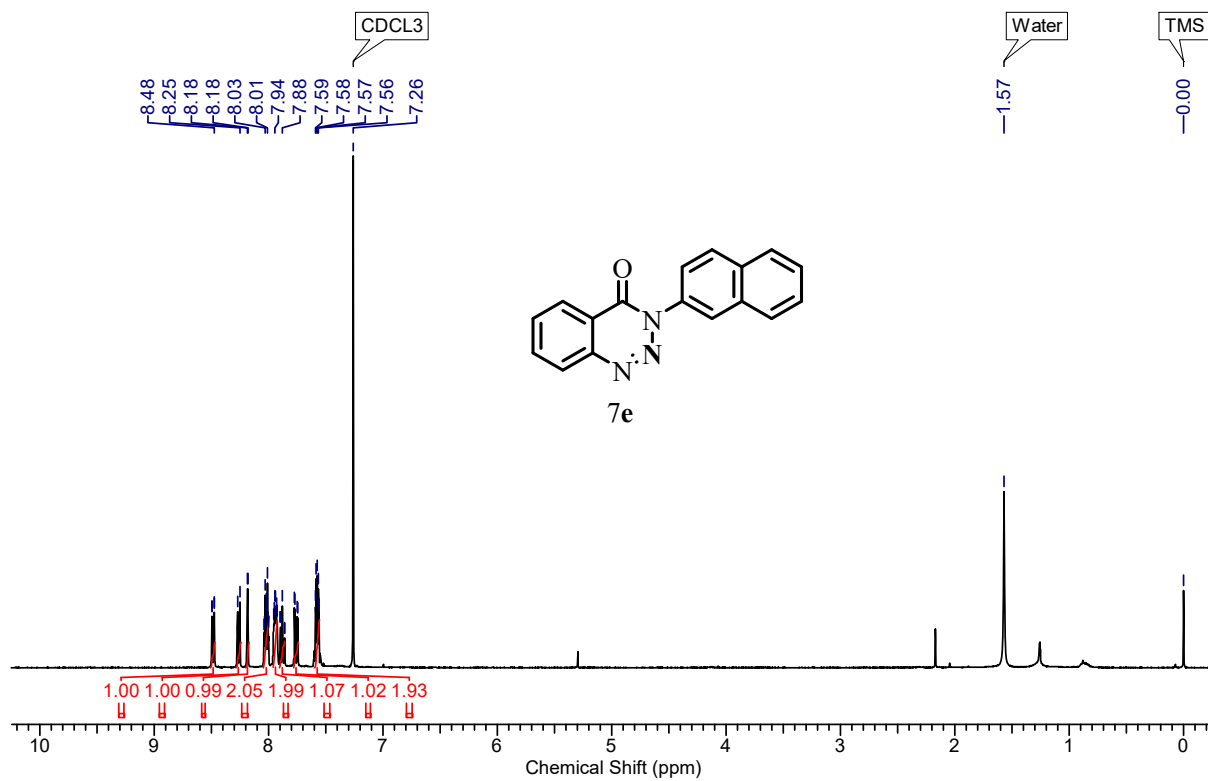

**$^1\text{H}$  NMR ( $\text{CDCl}_3$ , 400 MHz) of Compound 7e**

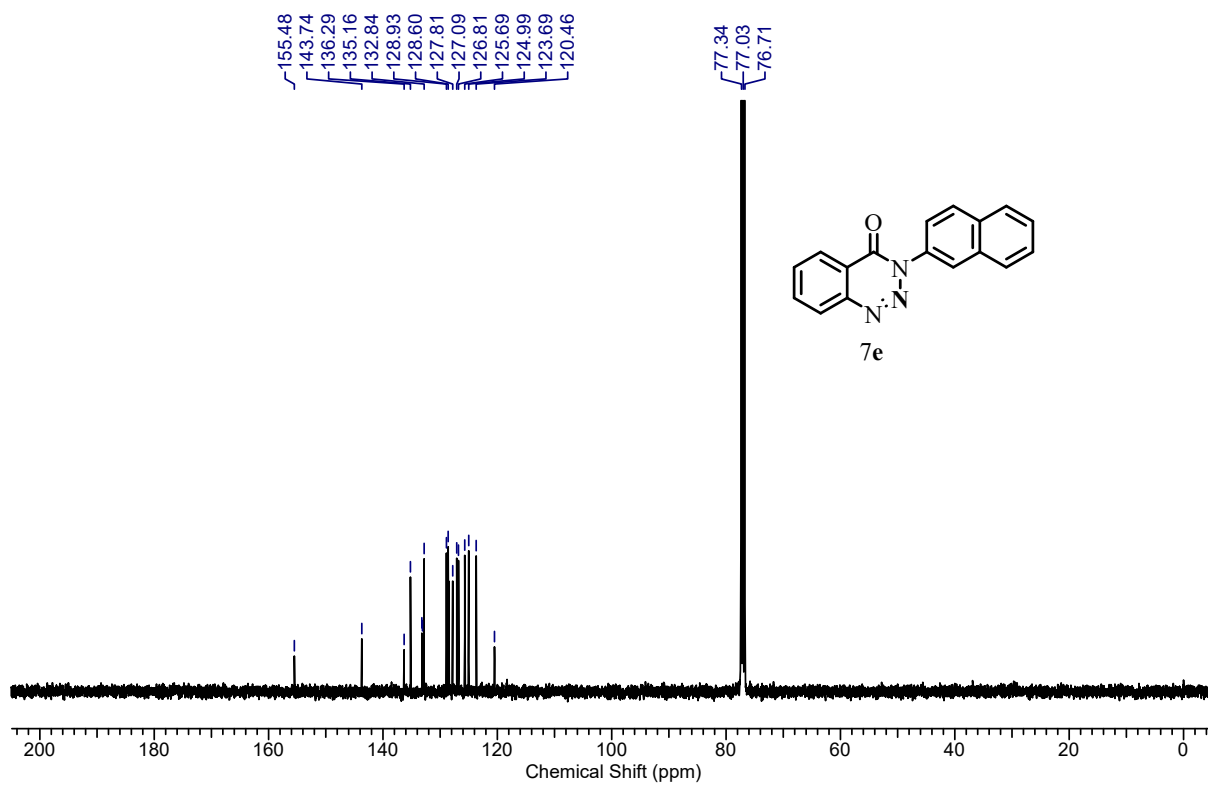

**$^{13}\text{C}$  NMR ( $\text{CDCl}_3$ , 100 MHz) of Compound 7e**

BAA-20\_20260227142433 #299 RT: 1.82 AV: 1 NL: 2.36E7  
T: FTMS + p ESI Full ms [100.0000-1500.0000]

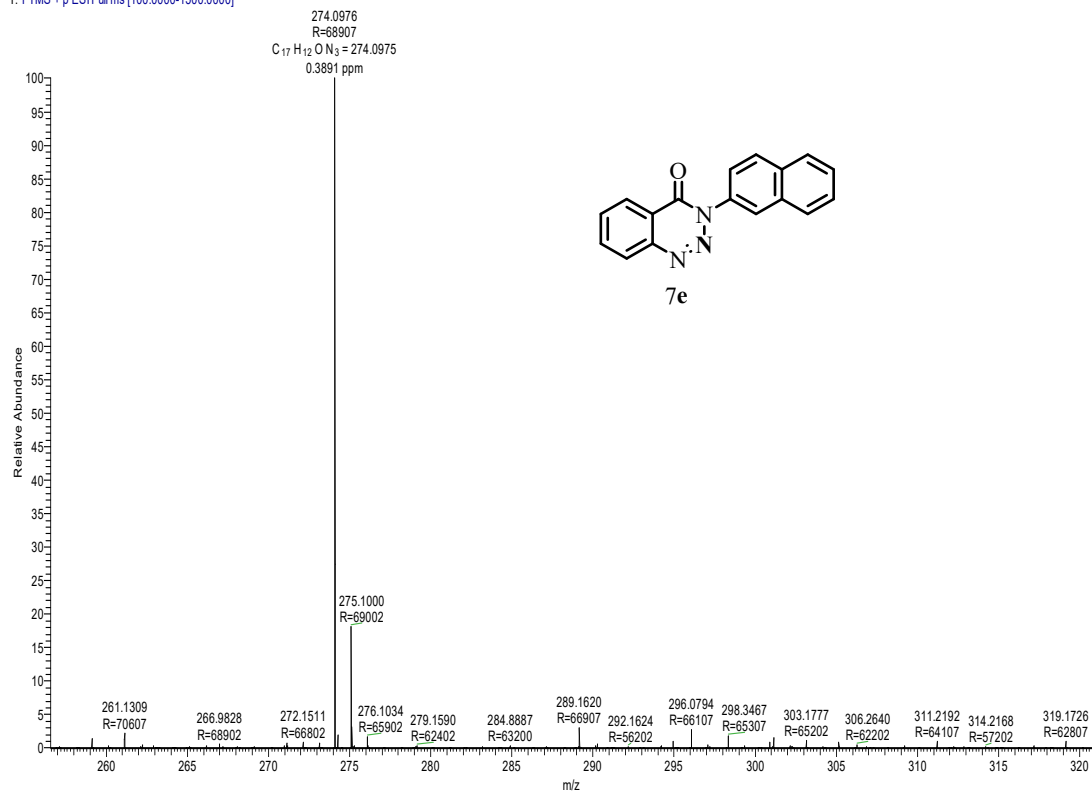

### HRMS of Compound 7e

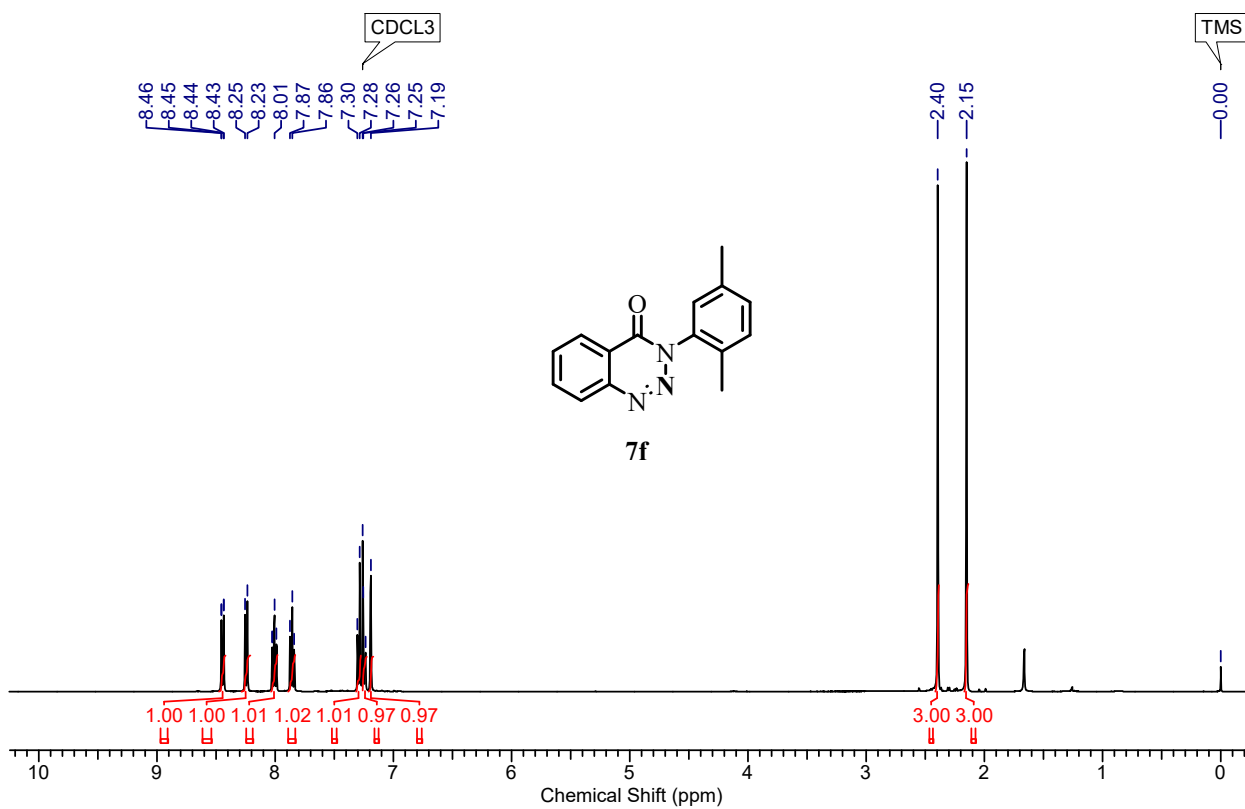

**$^1\text{H}$  NMR ( $\text{CDCl}_3$ , 400 MHz) of Compound 7f**

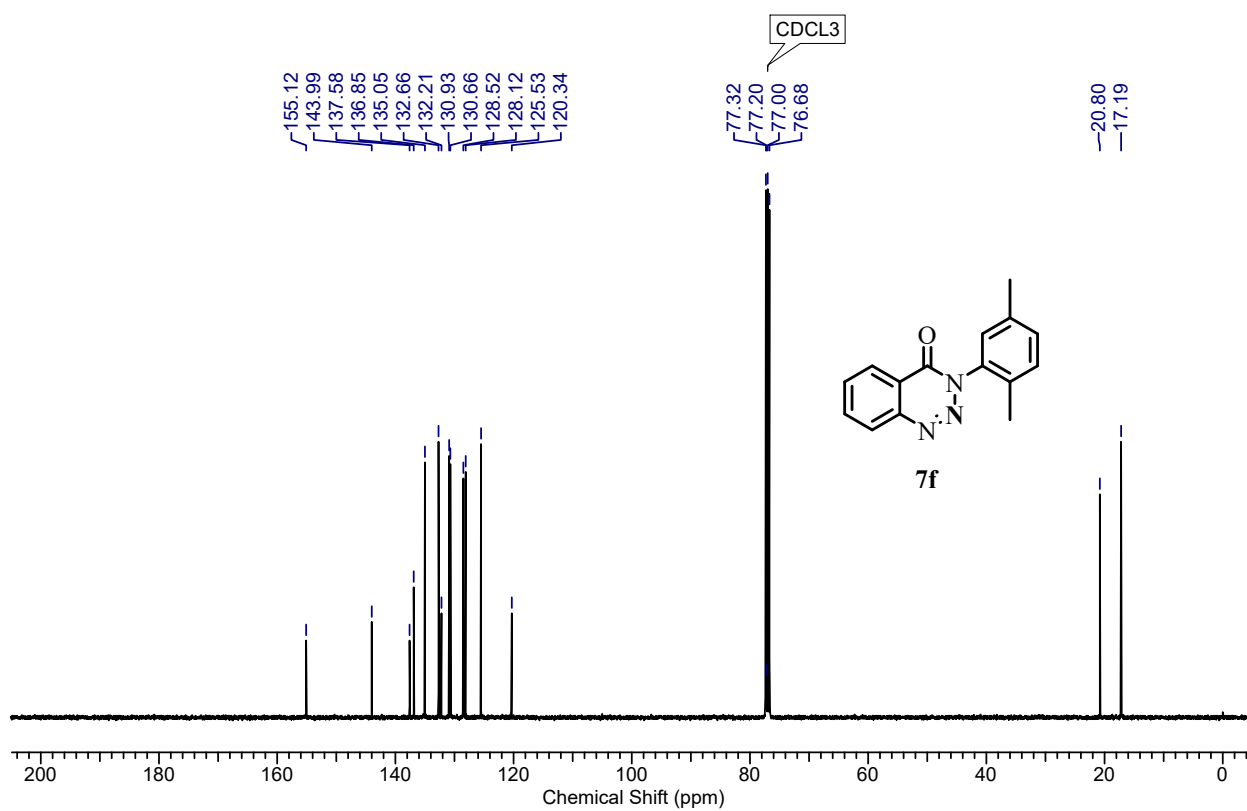

**$^{13}\text{C}$  NMR ( $\text{CDCl}_3$ , 100 MHz) of Compound 7f**

BAA-21 20250918033228 #386 RT: 2.19 AV: 1 NL: 2.35E9  
T: FTMS + p ESI Full ms [100.0000-1500.0000]

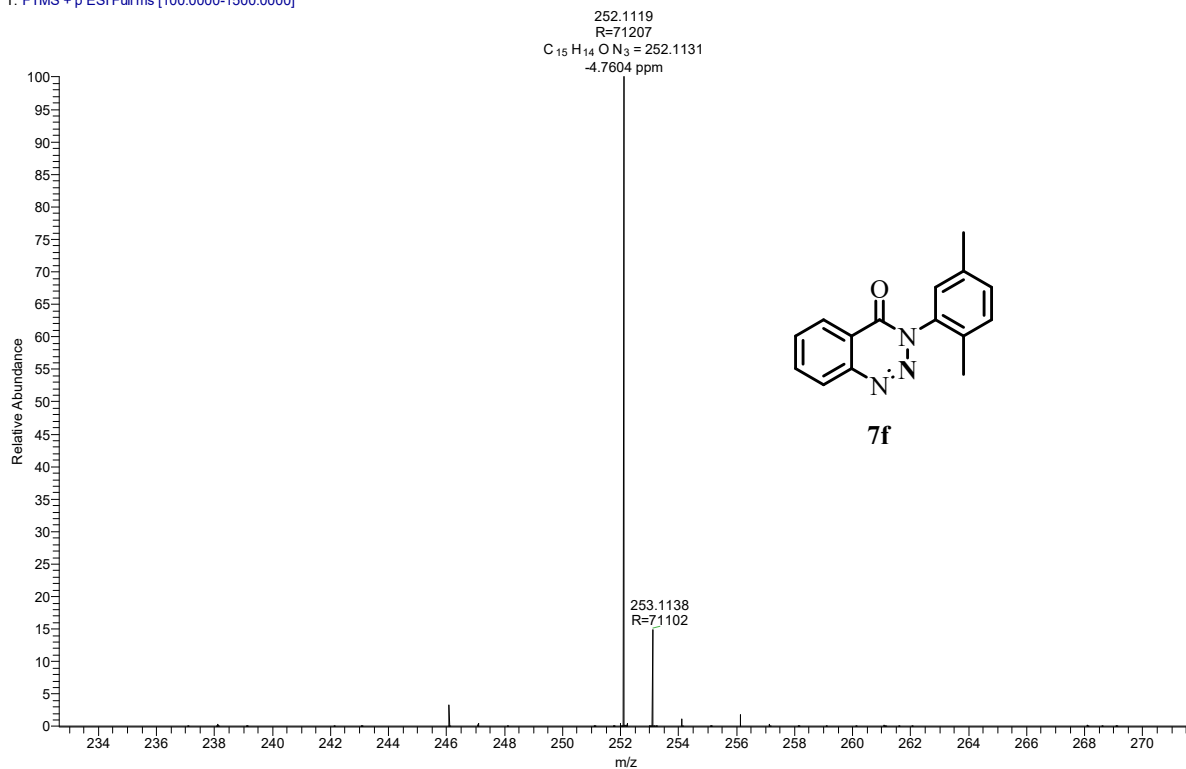

### HRMS of Compound 7f

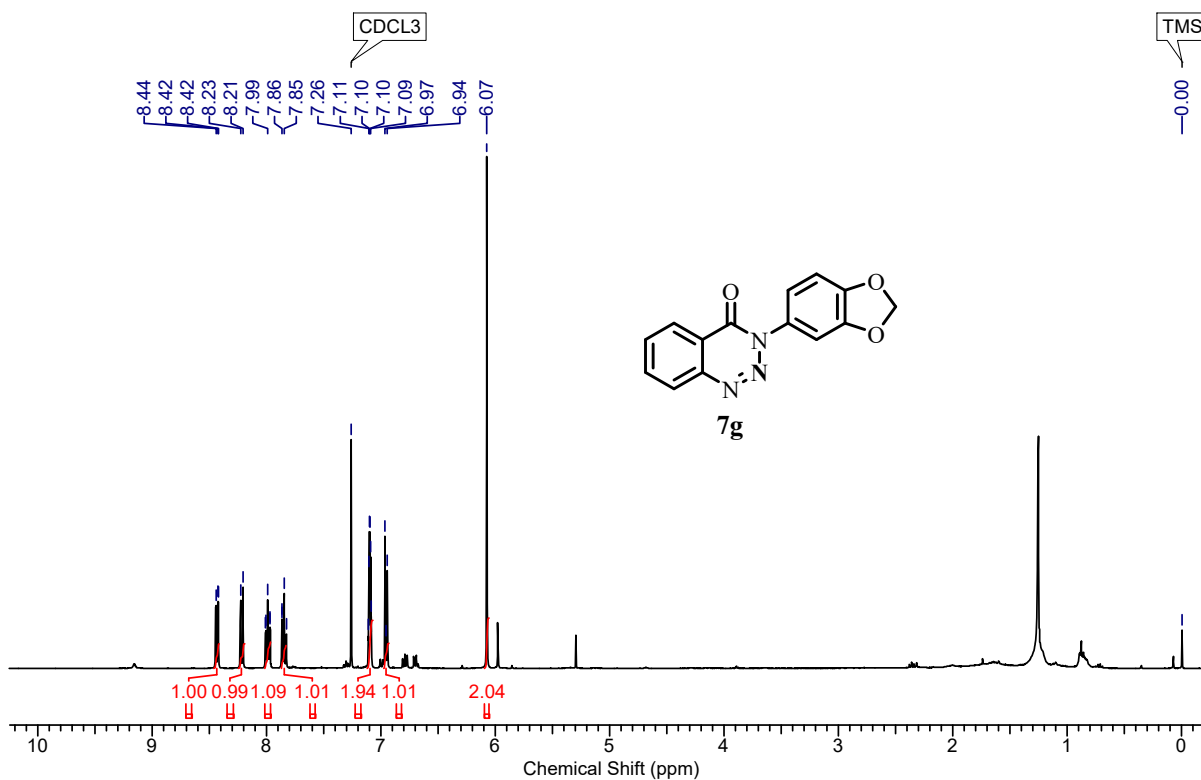

### <sup>1</sup>H NMR (CDCl<sub>3</sub>, 400 MHz) of Compound 7g

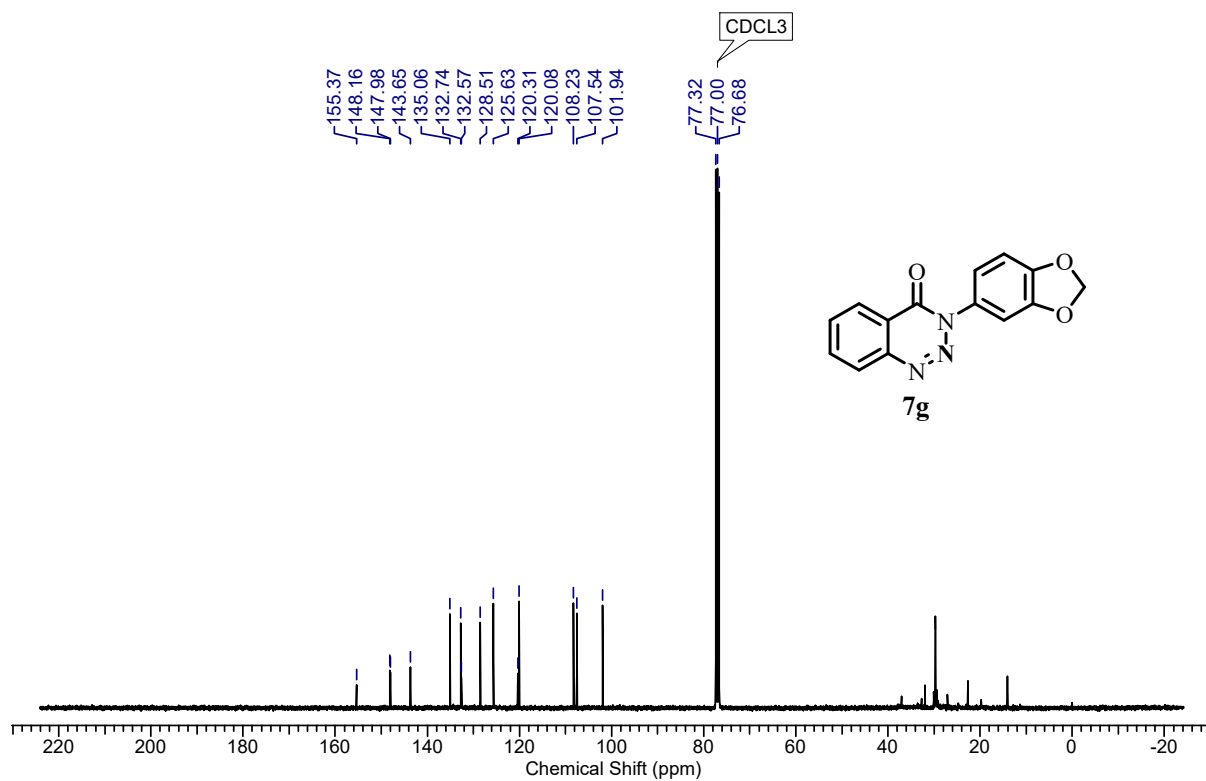

**<sup>13</sup>C NMR (CDCl<sub>3</sub>, 100 MHz) of Compound 7g**

BAA-22 #328 RT: 1.95 AV: 1 NL: 9.95E6  
T: FTMS + p ESI Full ms [100.0000-1500.0000]

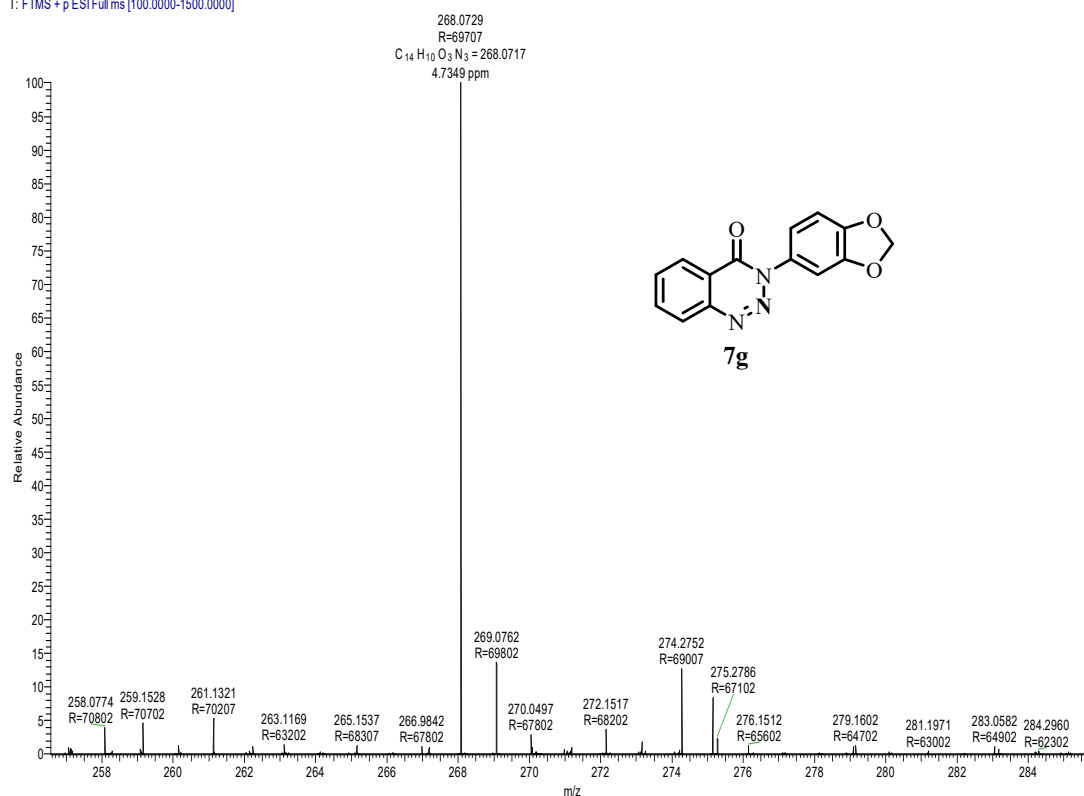

**HRMS of Compound 7g**

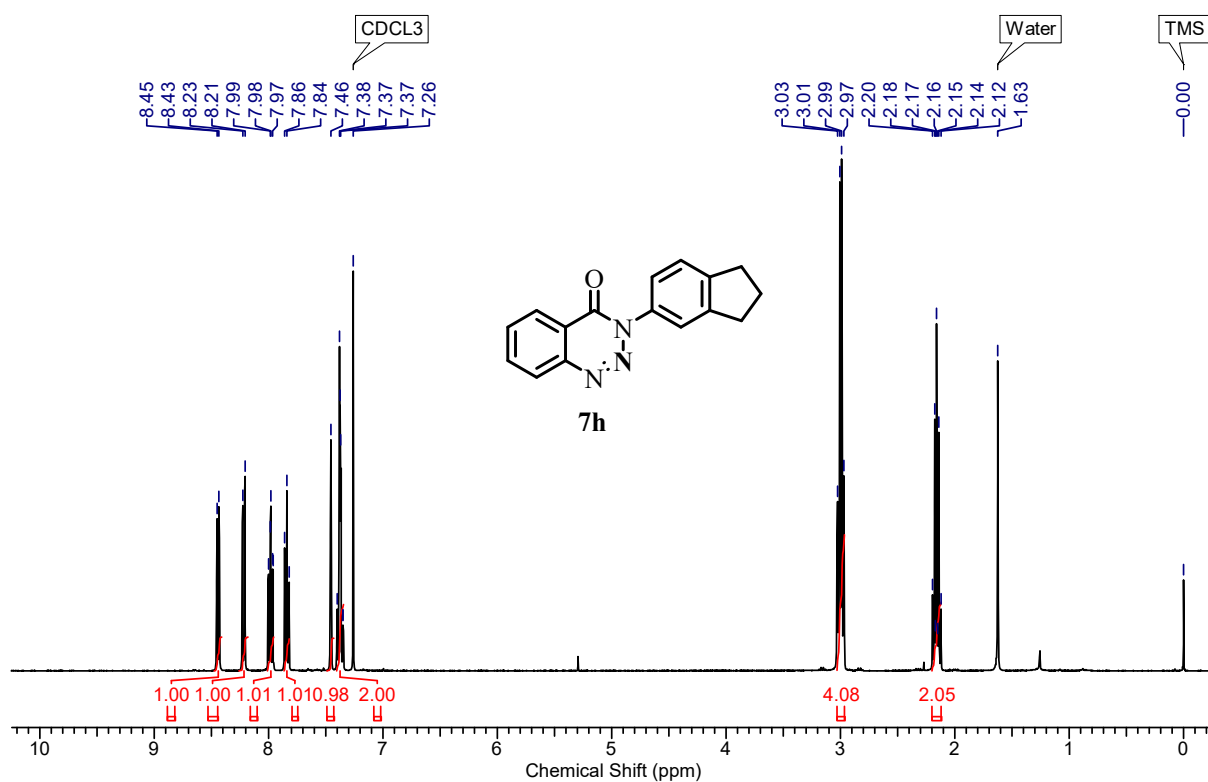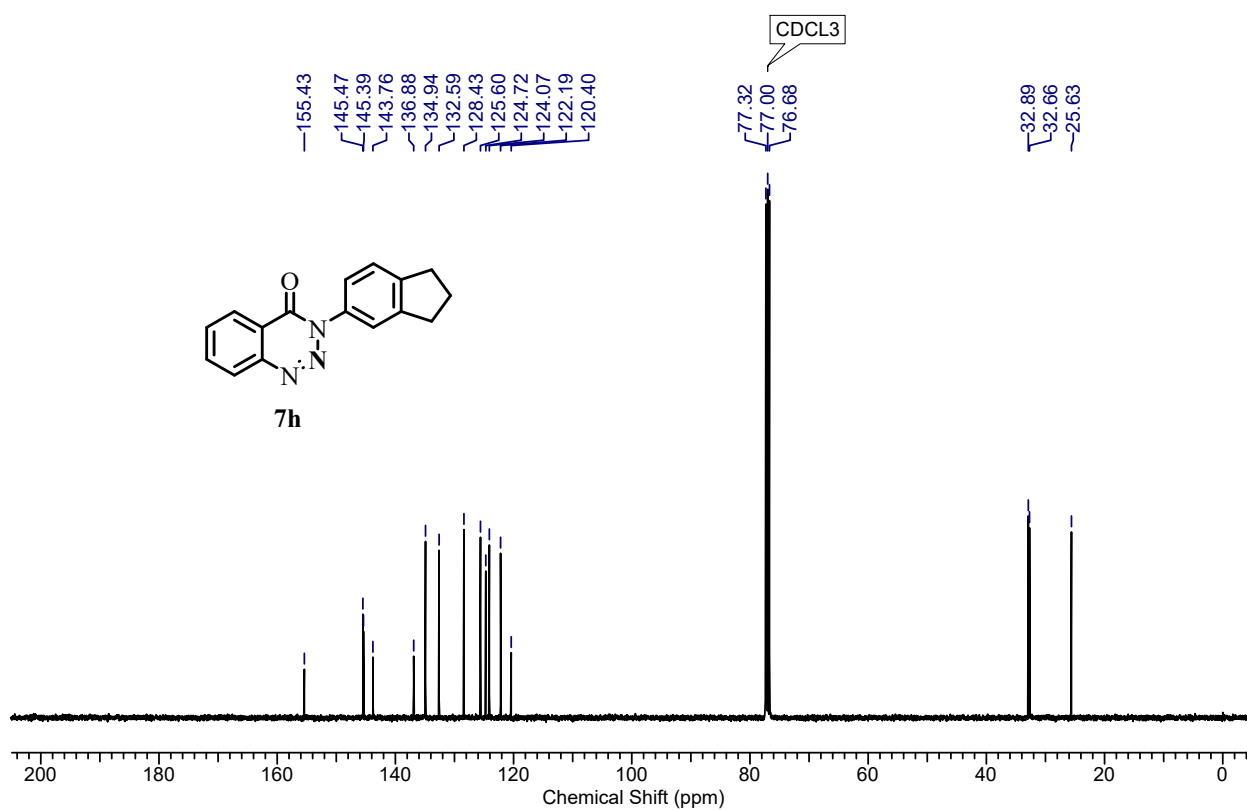

BAA-23\_20250918033822 #420 RT: 2.37 AV: 1 NL: 1.72E9  
T: FTMS + p ESI Full ms [100.0000-1500.0000]

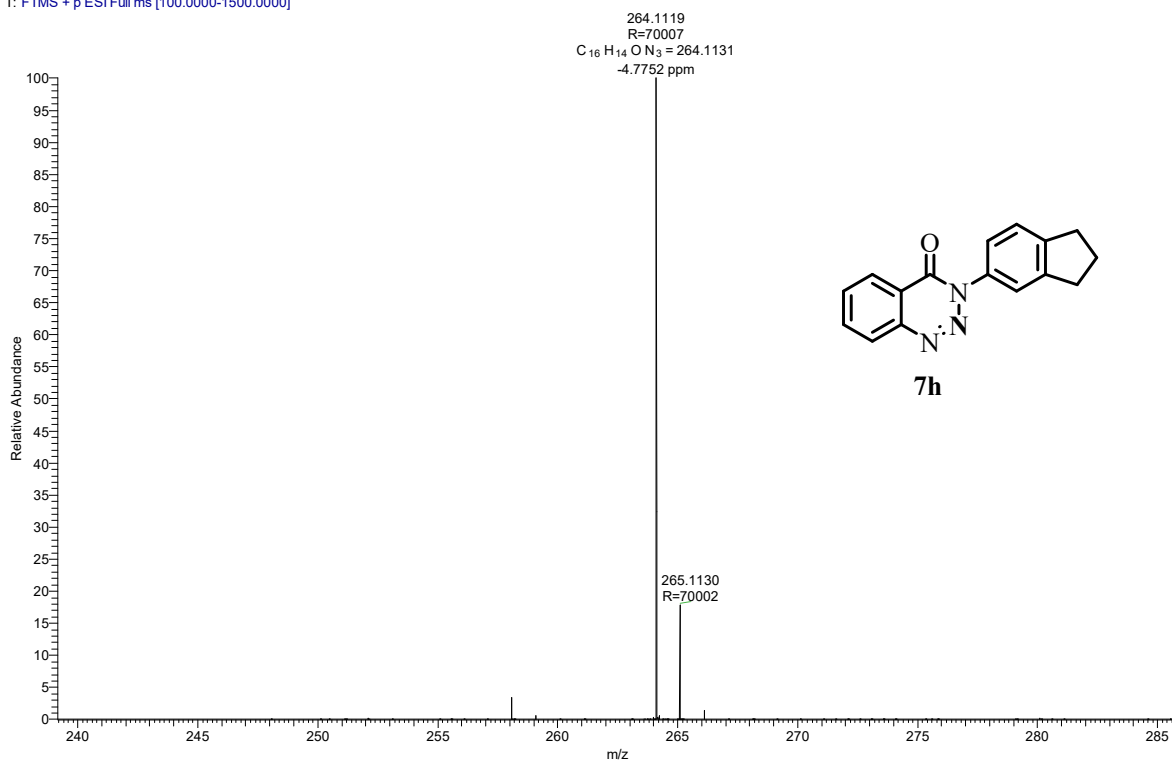

### HRMS of Compound 7h

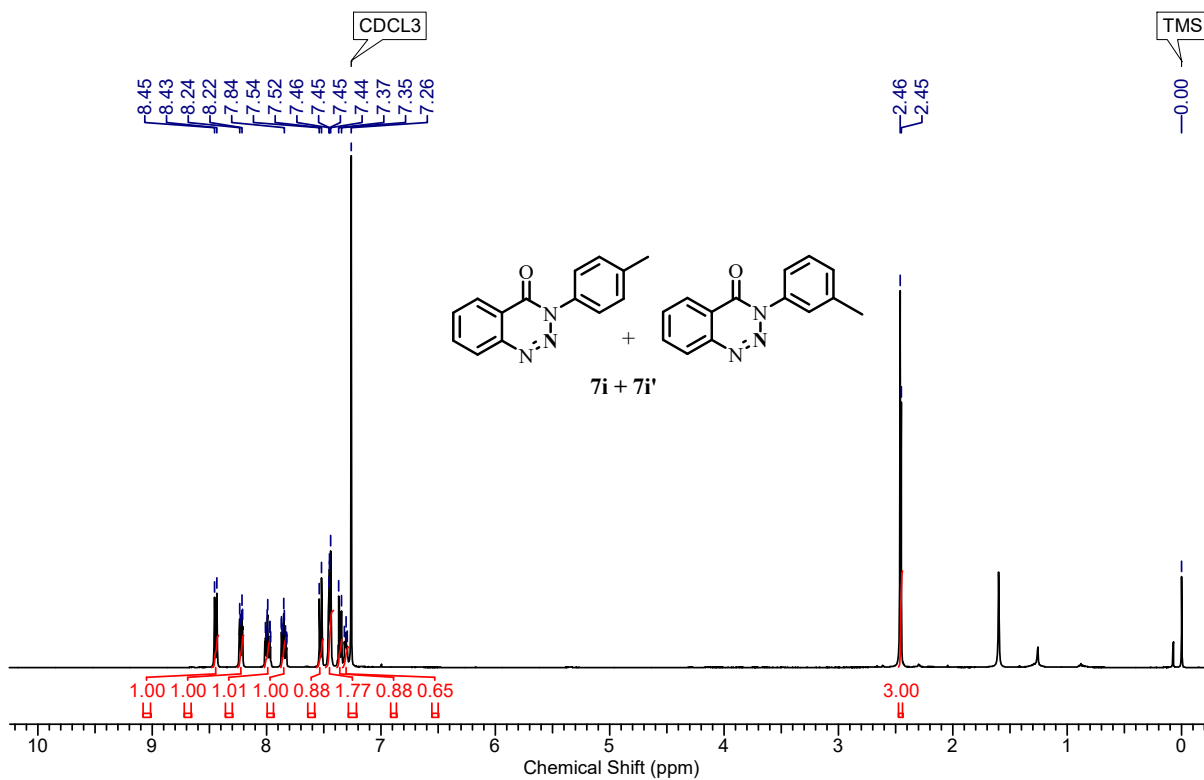

### <sup>1</sup>H NMR (CDCl<sub>3</sub>, 400 MHz) of Compound 7i + 7i'

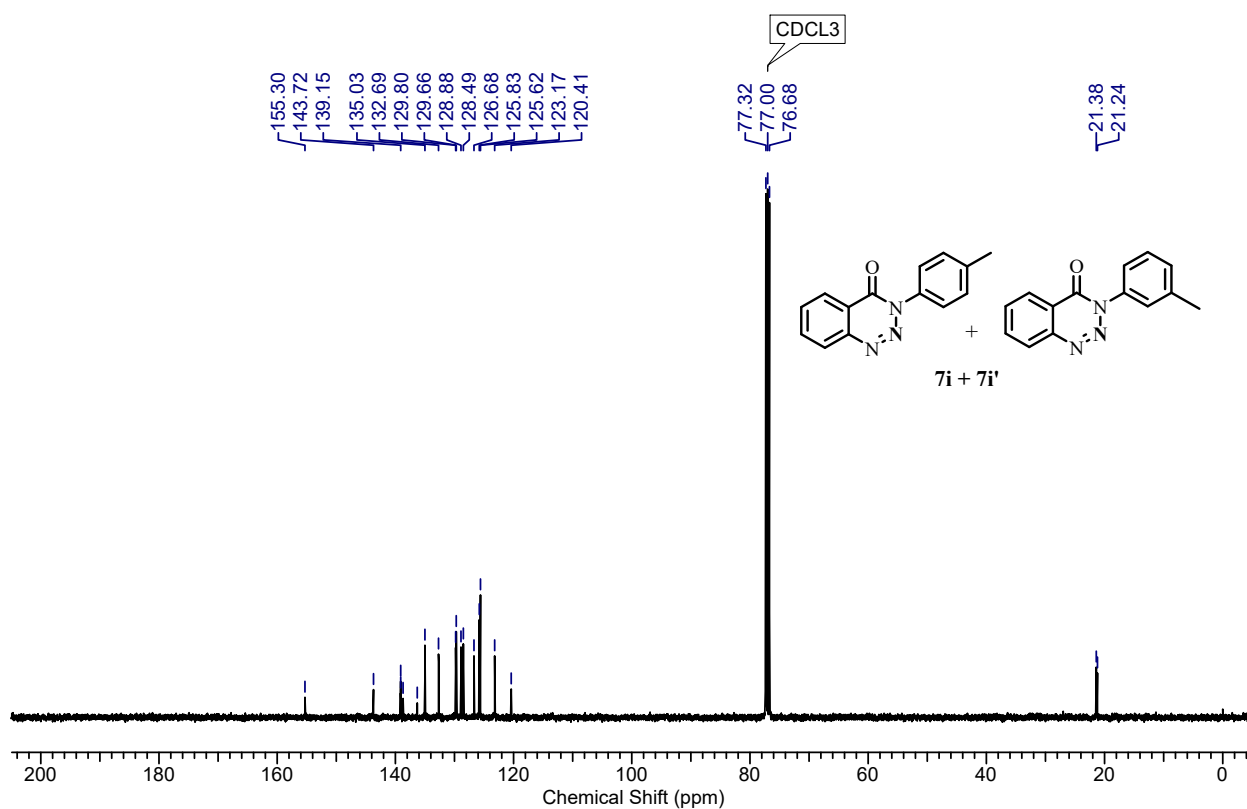

**<sup>13</sup>C NMR (CDCl<sub>3</sub>, 100 MHz) of Compound 7i + 7i'**

BAA-24 #343 RT: 1.99 AV: 1 NL: 7.44E8  
T: FTMS + p ESIFull.ms [100.0000-1500.0000]

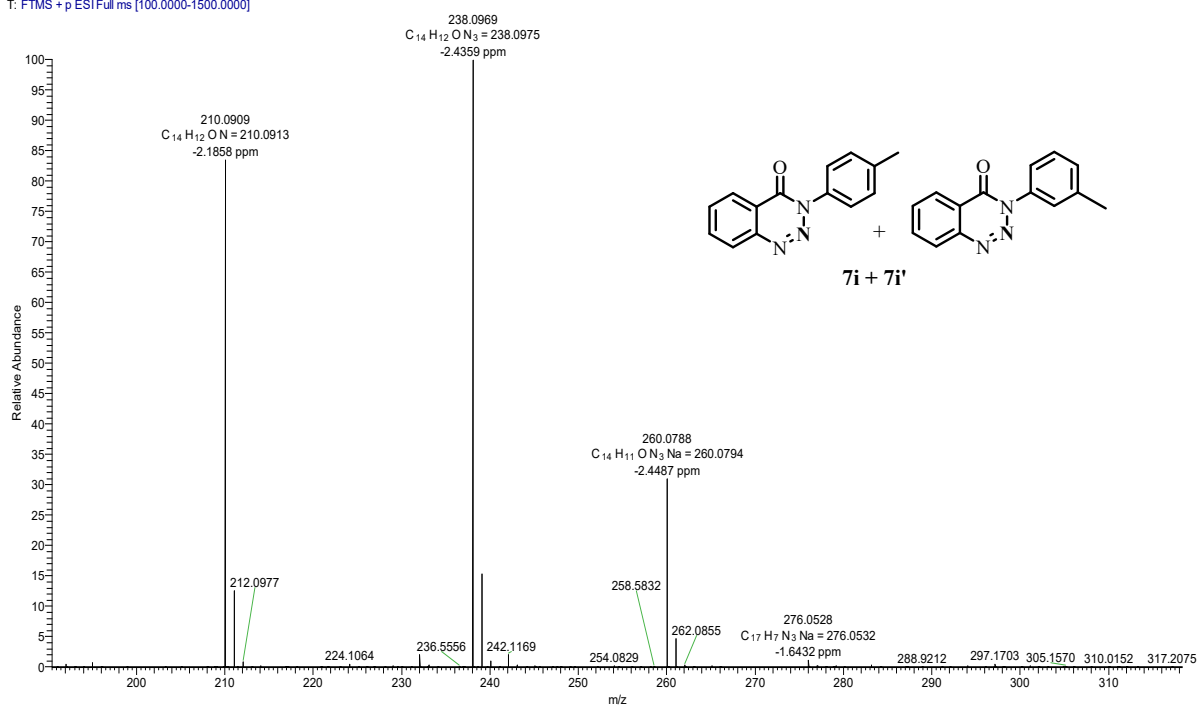

# HRMS of Compound 7i + 7i'

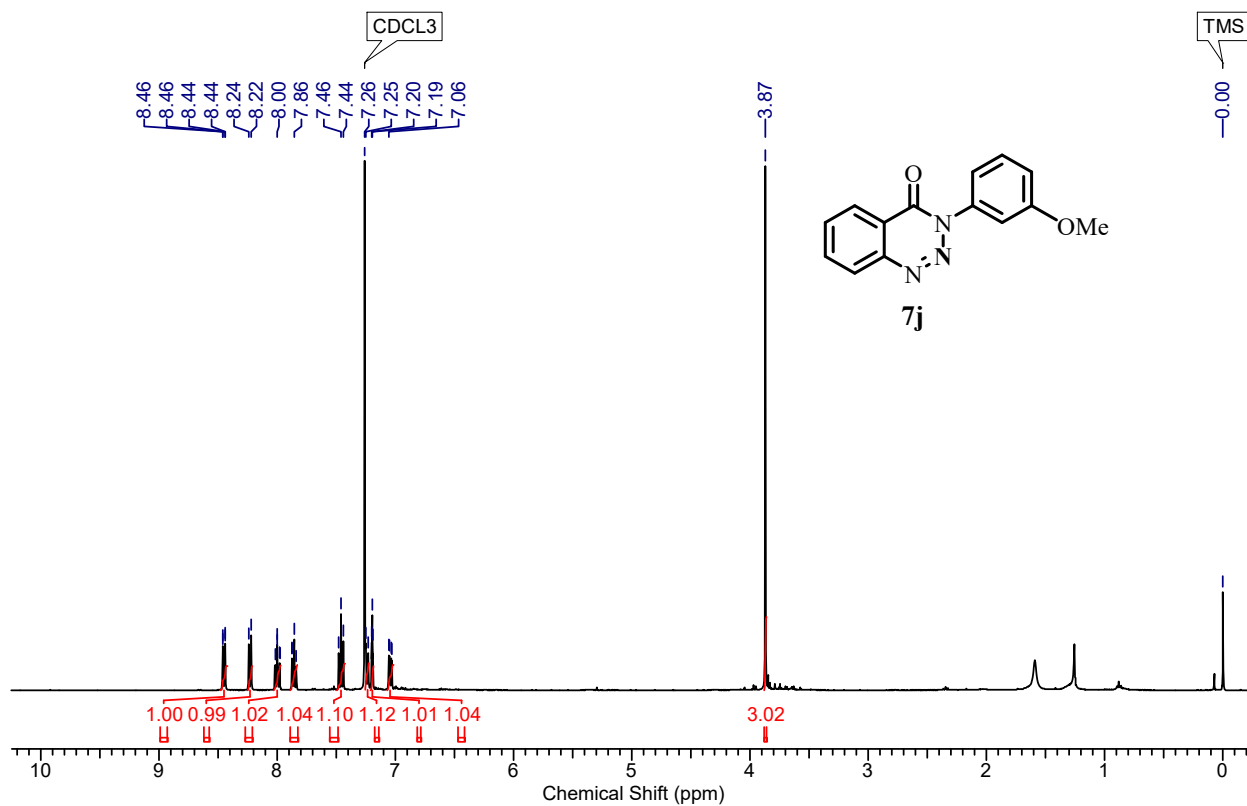

<sup>1</sup>H NMR (CDCl<sub>3</sub>, 400 MHz) of Compound 7j

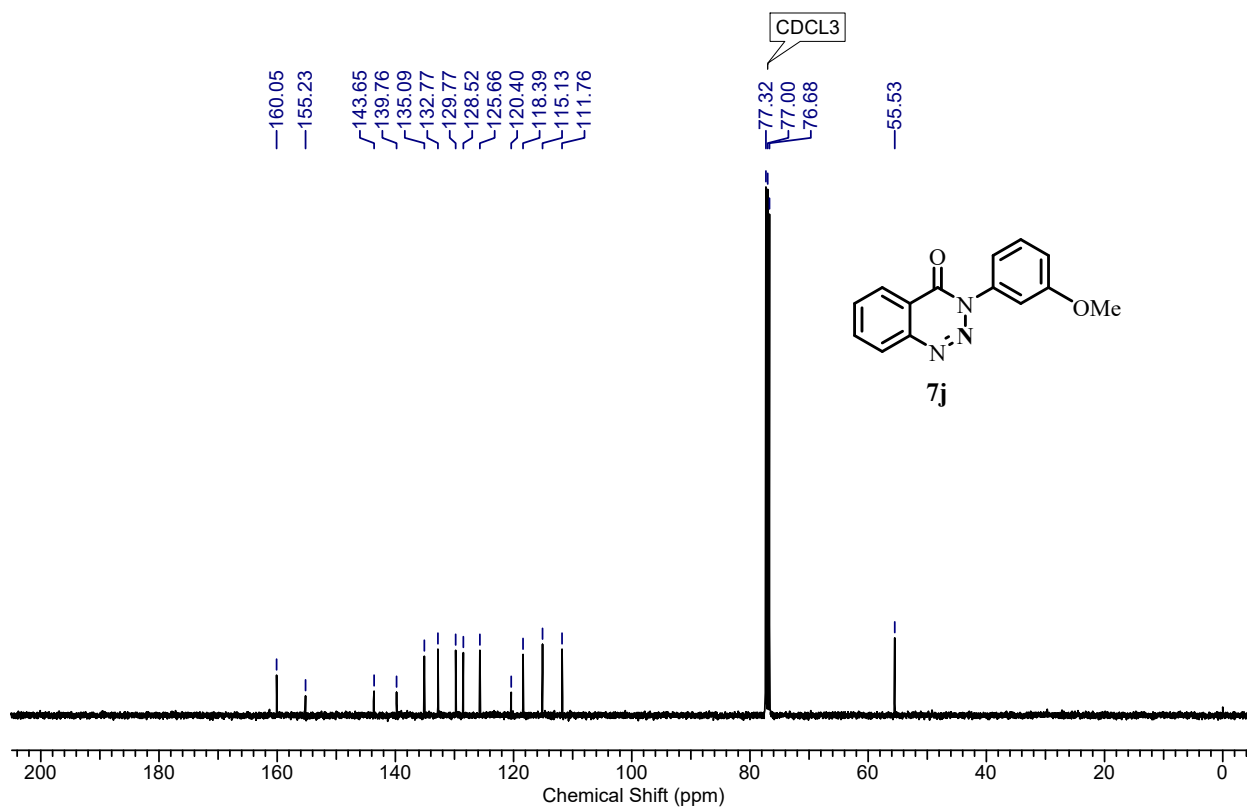

**<sup>13</sup>C NMR (CDCl<sub>3</sub>, 100 MHz) of Compound 7j**

BAA-25 #404 RT: 2.13 AV: 1 NL: 8.72E8  
T: FTMS + p ESI Full ms [100.0000-1500.0000]

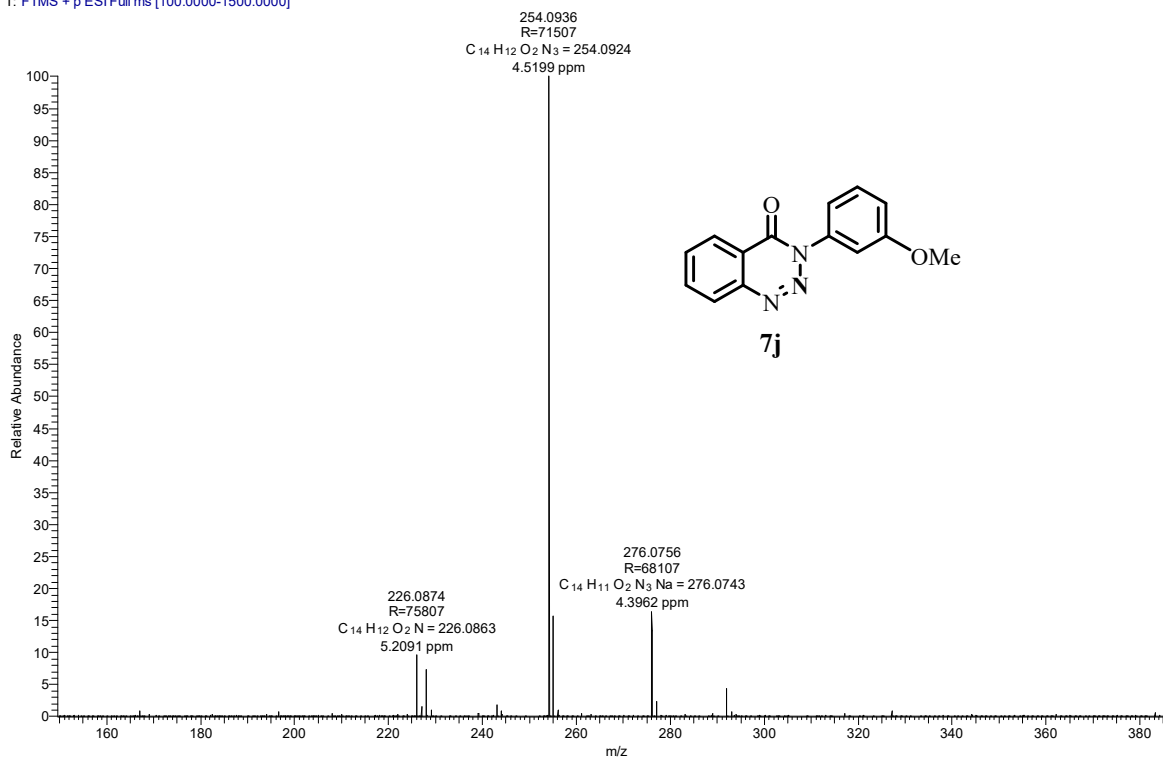

### HRMS of Compound 7j

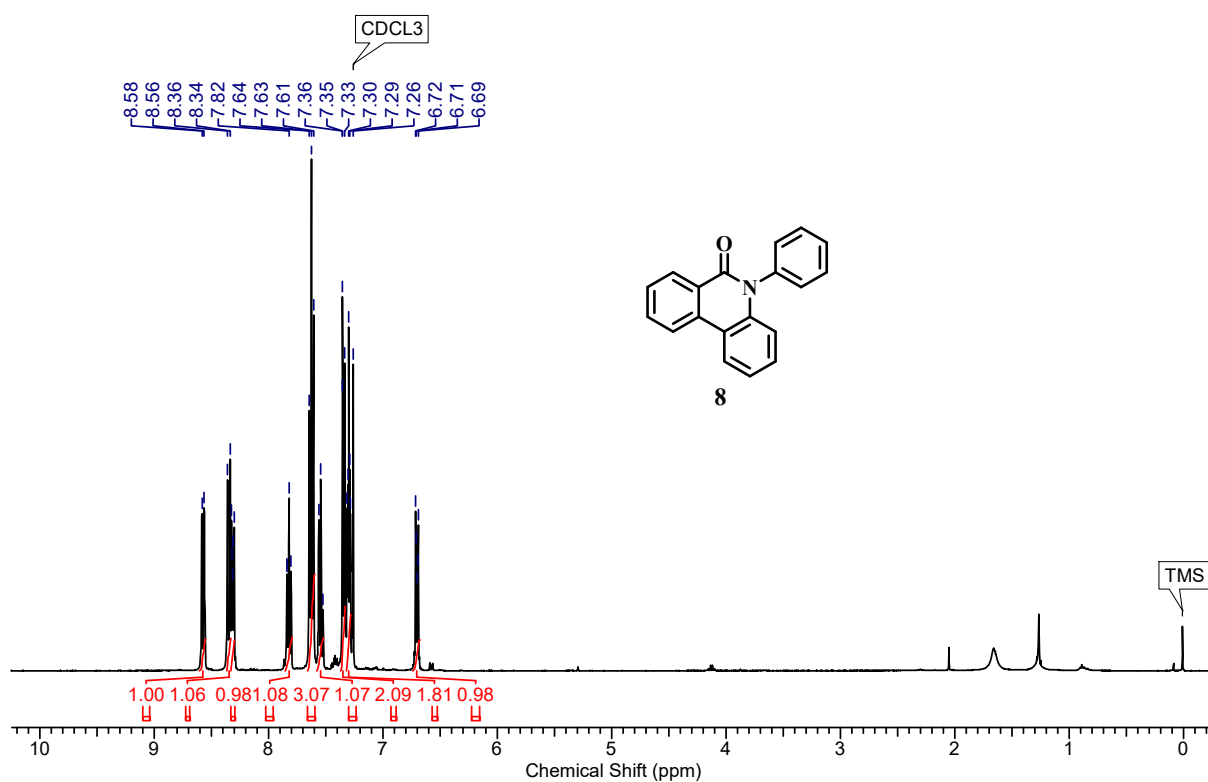

### <sup>1</sup>H NMR (CDCl<sub>3</sub>, 400 MHz) of Compound 8

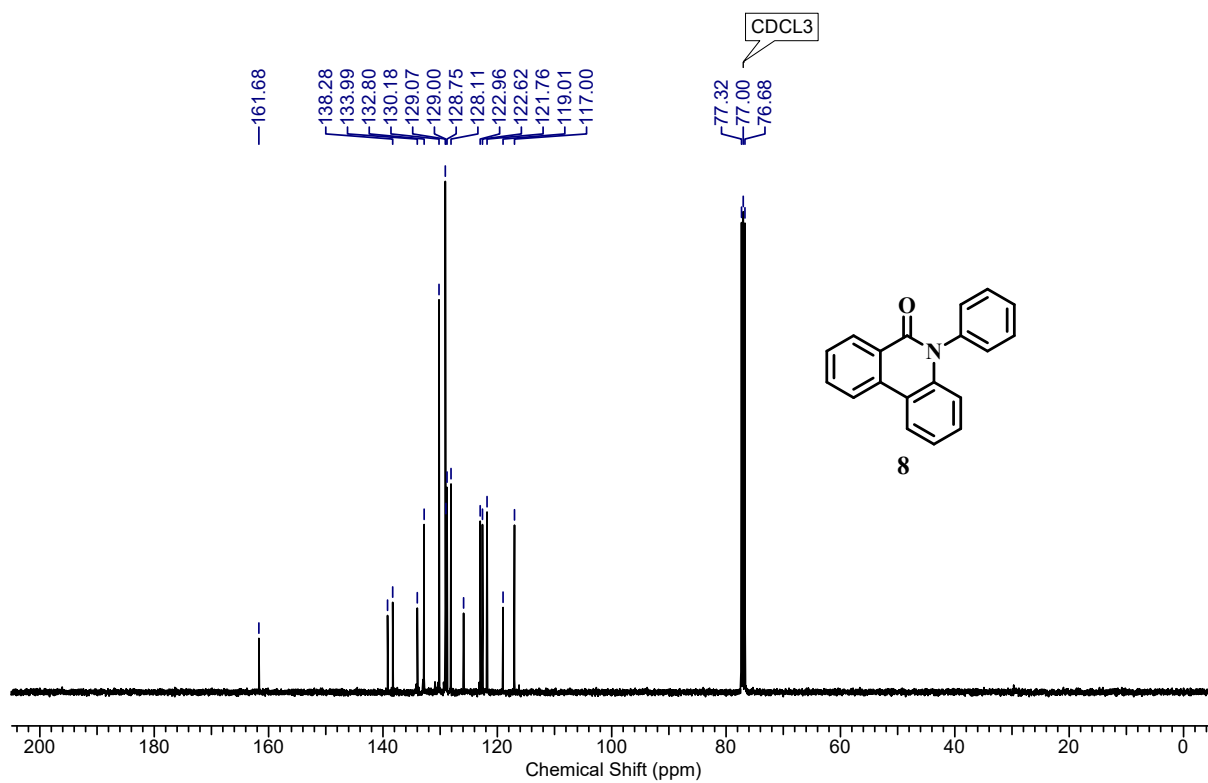

### <sup>13</sup>C NMR (CDCl<sub>3</sub>, 100 MHz) of Compound 8

BAA-8A #375 RT: 2.23 AV: 1 NL: 1.73E9  
T: FTMS + p ESI Full ms [100.0000-1500.0000]

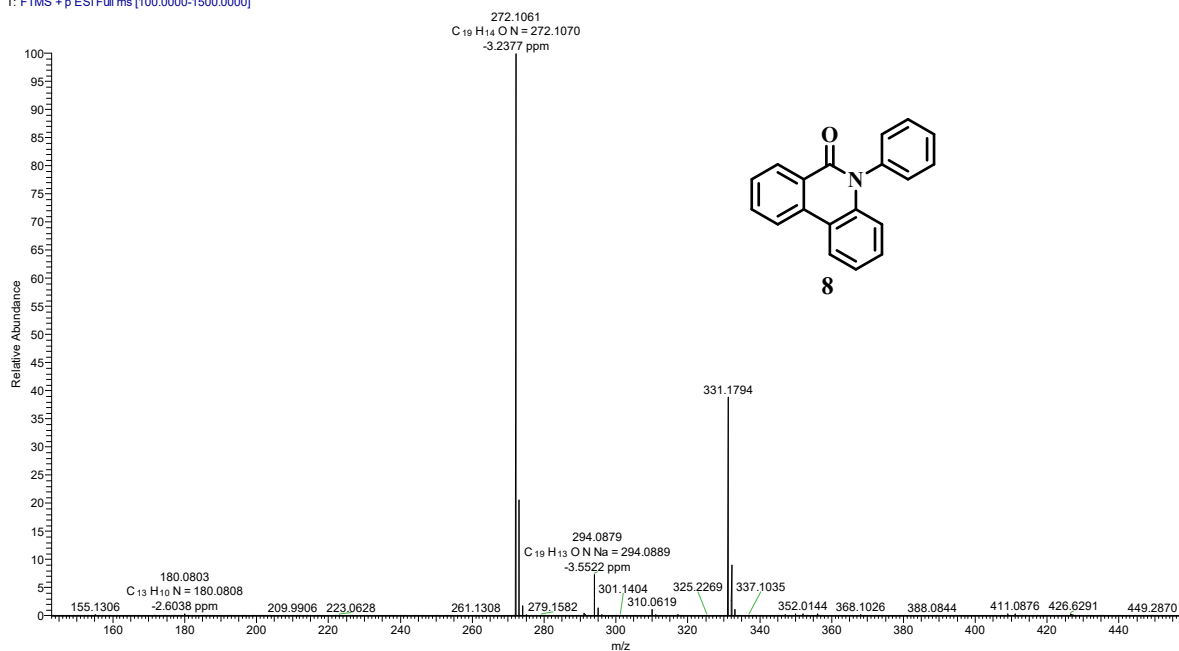

### HRMS of Compound 8

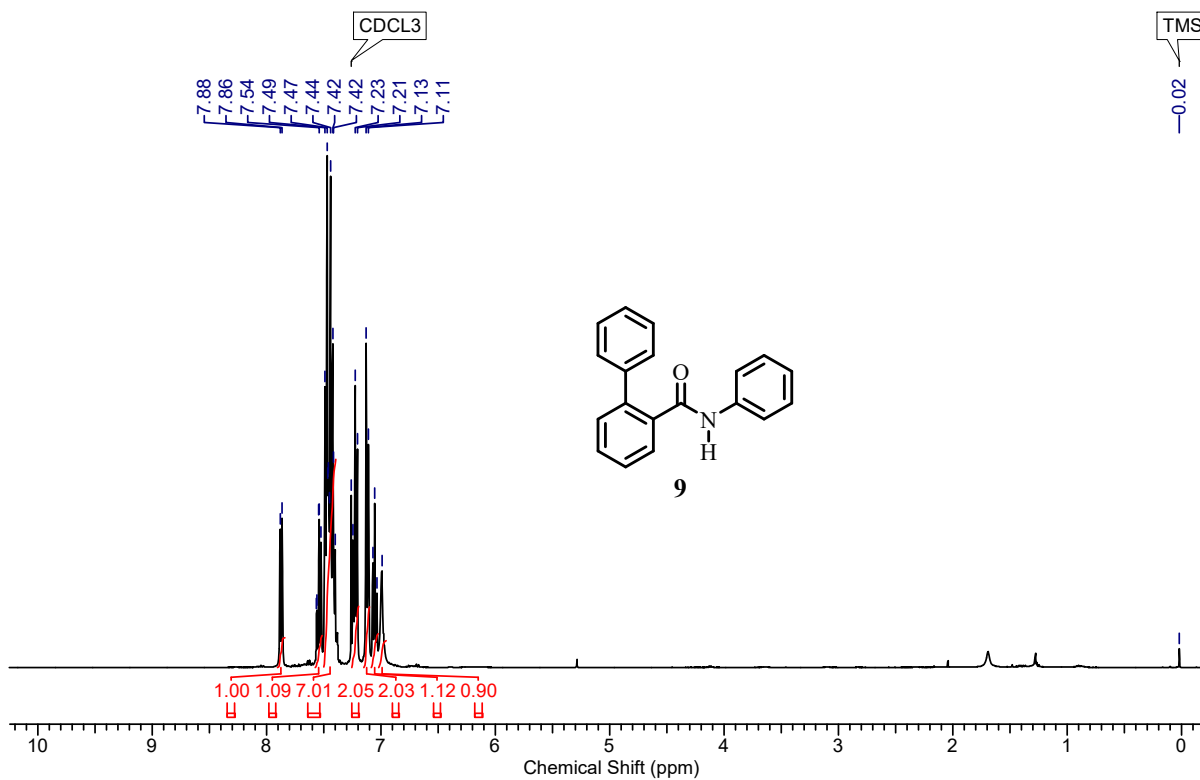

### <sup>1</sup>H NMR (CDCl<sub>3</sub>, 400 MHz) of Compound 9

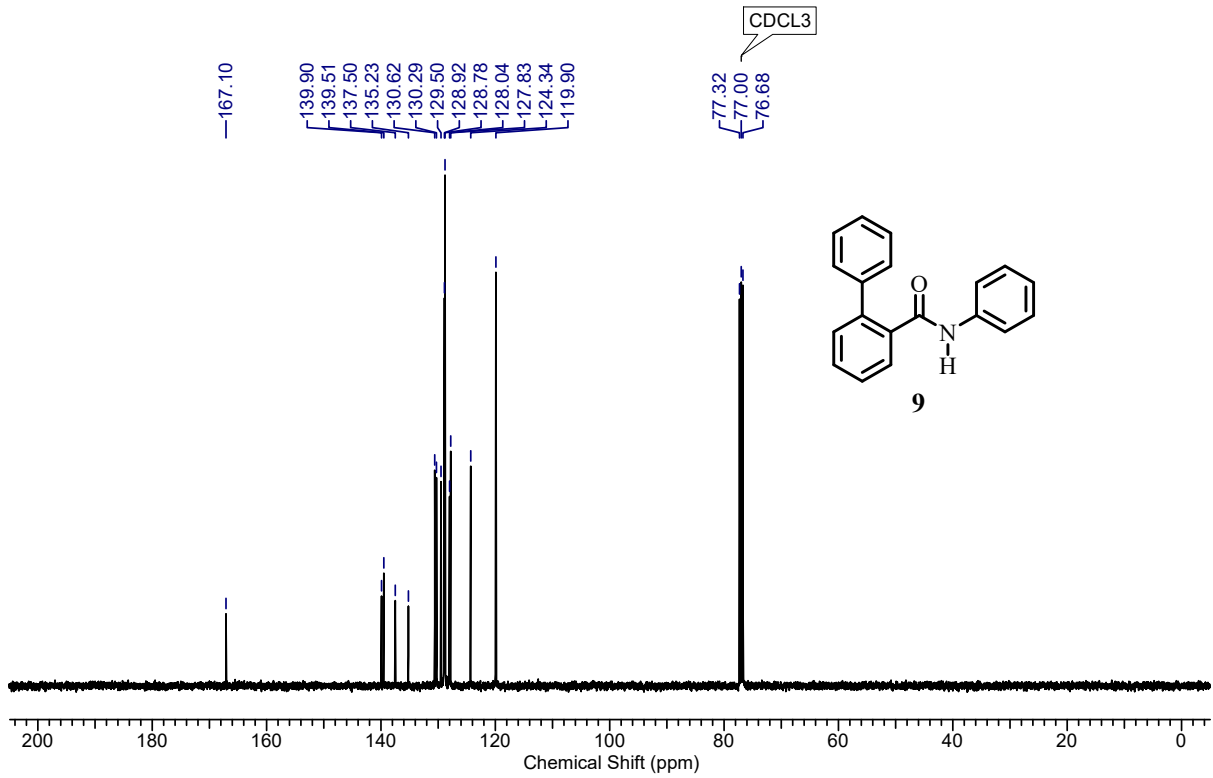

### <sup>13</sup>C NMR (CDCl<sub>3</sub>, 100 MHz) of Compound 9

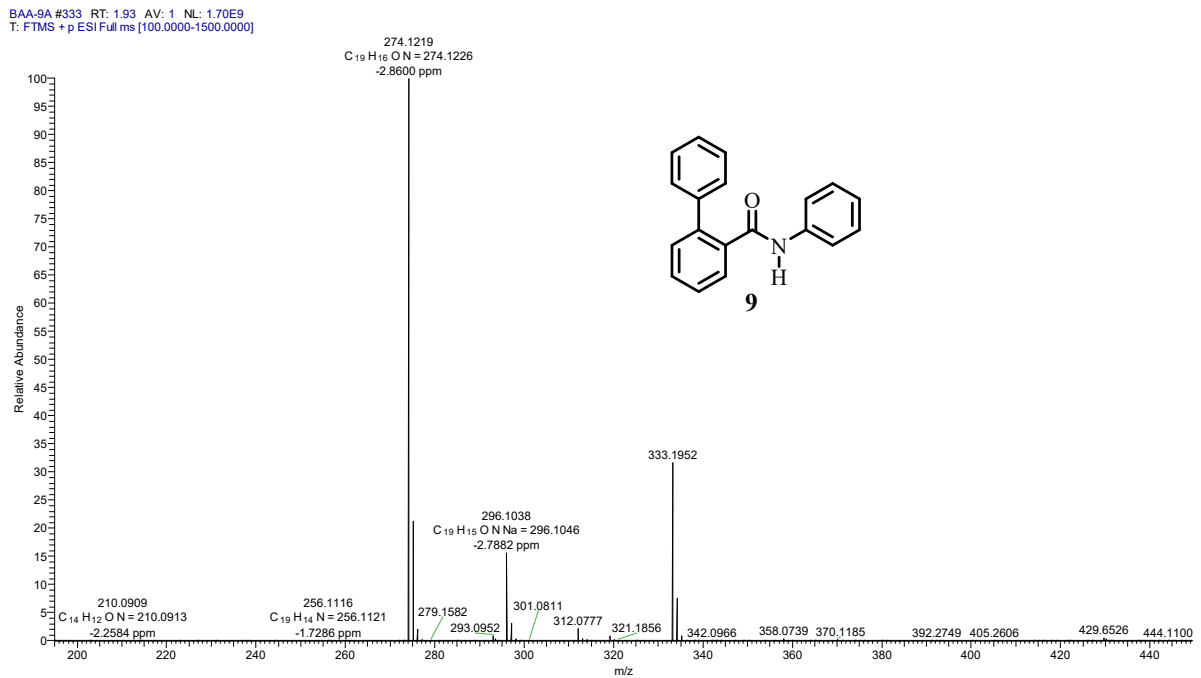

### HRMS of Compound 9

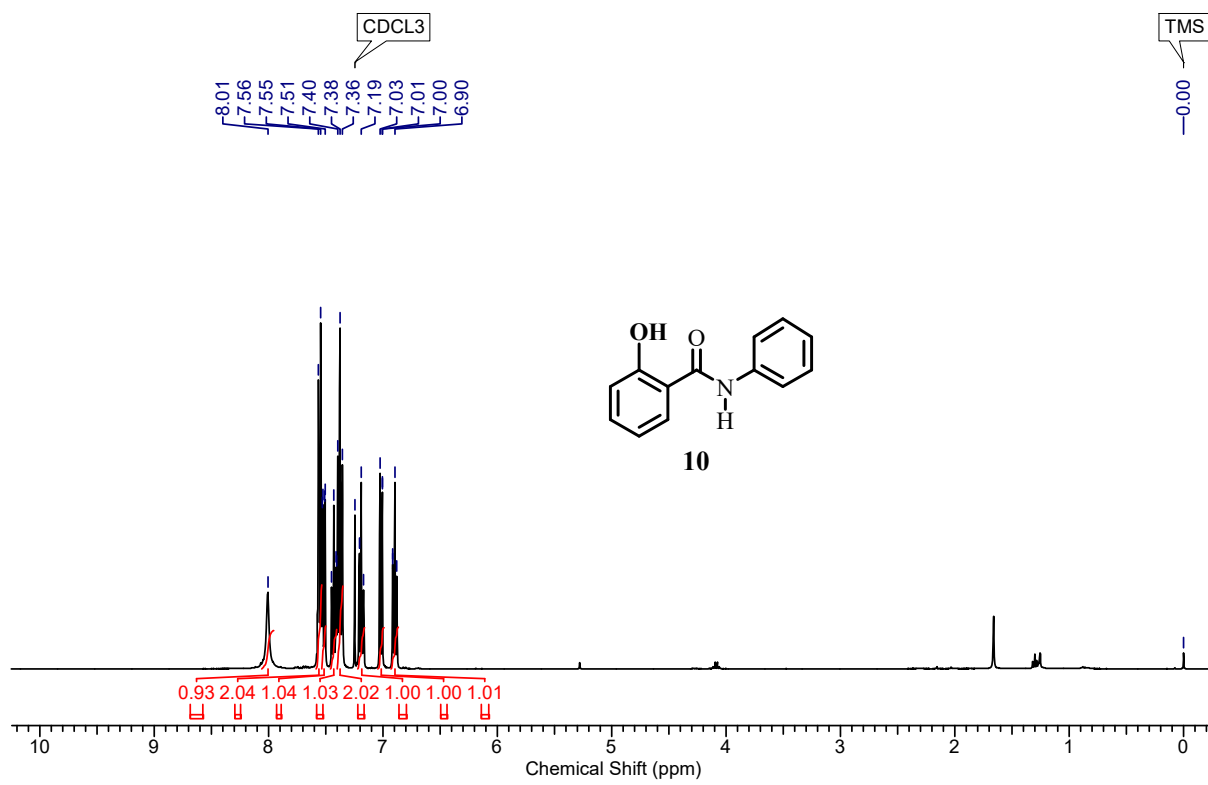

**<sup>1</sup>H NMR (CDCl<sub>3</sub>, 400 MHz) of Compound 10**

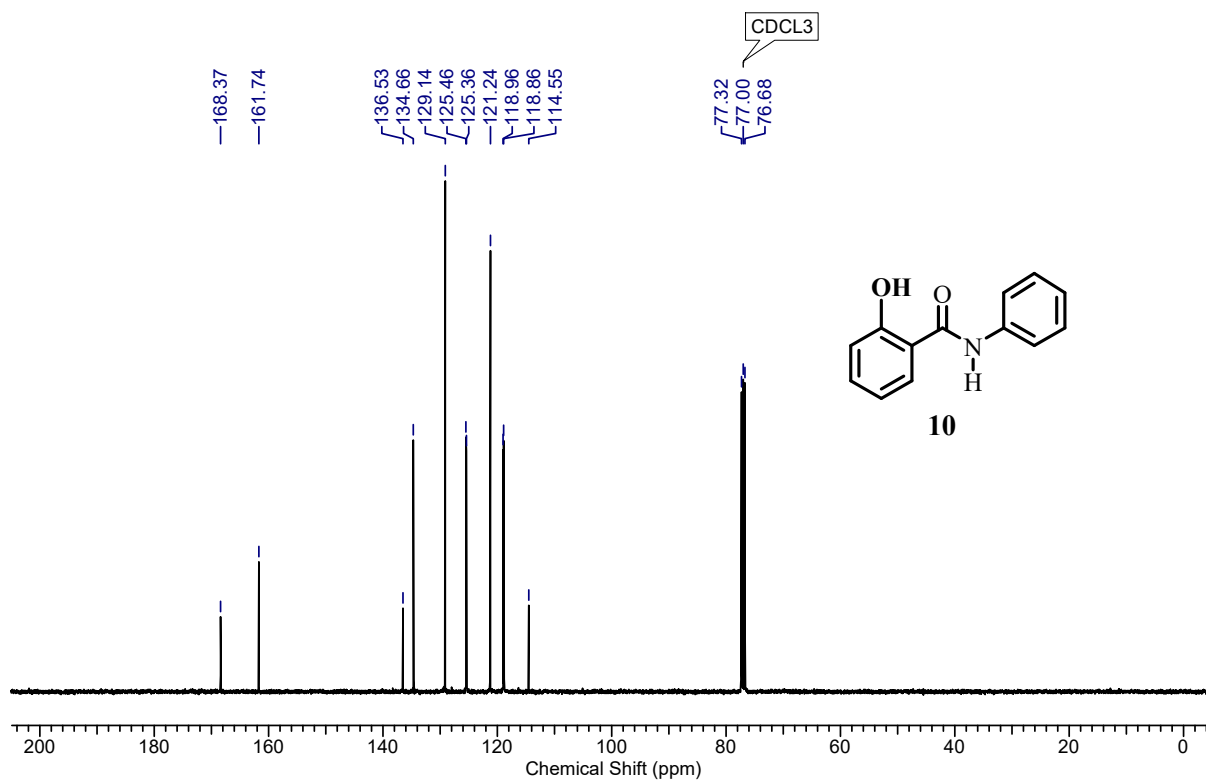

<sup>13</sup>C NMR (CDCl<sub>3</sub>, 100 MHz) of Compound 10

BAA-10A #213 RT: 1.76 AV: 1 NL: 1.55E7  
T: FTMS + p ESI Full ms [200.0000-2500.0000]

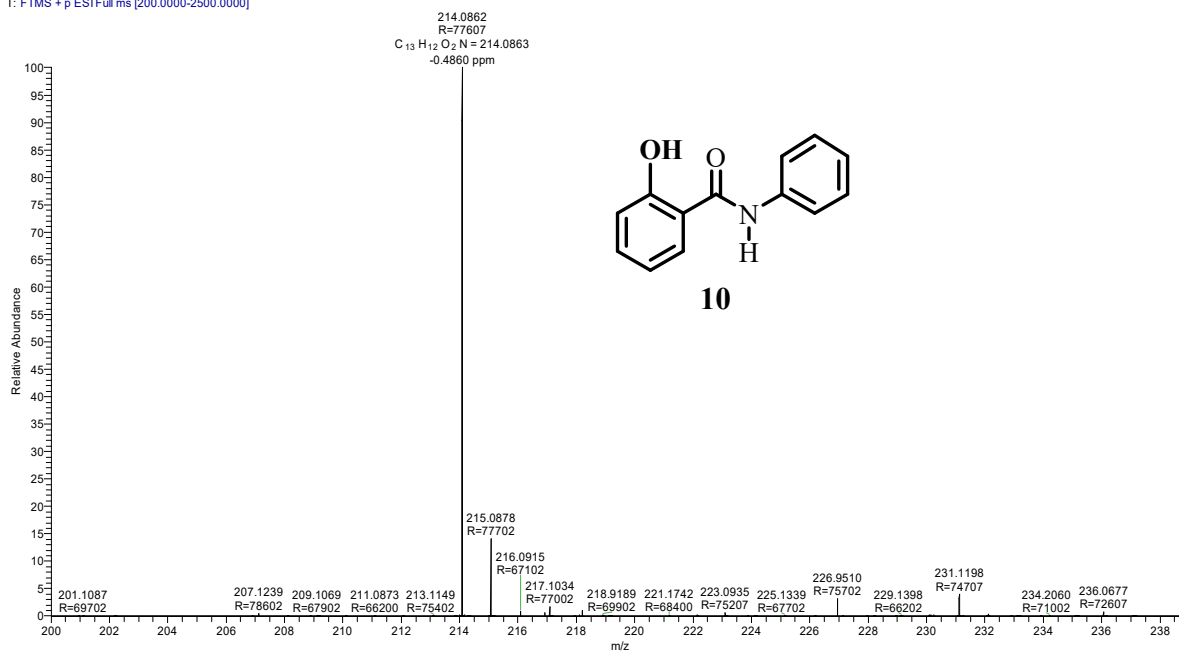

HRMS of Compound 10
